# 1    **Genomic and transcriptomic profiling of nematode parasites surviving** 2    **after vaccine exposure**

3

4    Guillaume Sallé<sup>1,2,\*</sup>, Roz Laing<sup>3</sup>, James A. Cotton<sup>2</sup>, Kirsty Maitland<sup>3</sup>, Axel Martinelli<sup>2#</sup>,  
5    Nancy Holroyd<sup>2</sup>, Alan Tracey<sup>2</sup>, Matthew Berriman<sup>2</sup>, W. David Smith<sup>4</sup>, George F. J.  
6    Newlands<sup>4</sup>, Eve Hanks<sup>3</sup>, Eileen Devaney<sup>3</sup>, Collette Britton<sup>3</sup>

7    <sup>1</sup>INRA - U. Tours, UMR 1282 ISP Infectiologie et Santé Publique, Centre de recherche Val  
8    de Loire, Nouzilly, France

9    <sup>2</sup>Wellcome Trust Sanger Institute, Wellcome Genome Campus, Hinxton, Cambridge, United-  
10    Kingdom

11    <sup>3</sup>Institute of Biodiversity, Animal Health and Comparative Medicine, College of Medical,  
12    Veterinary and Life Sciences, University of Glasgow, Bearsden Road, Glasgow, United-  
13    Kingdom

14    <sup>4</sup>Moredun Research Institute, Pentlands Science Park, Bush Loan, Penicuik, Midlothian,  
15    United-Kingdom

16    <sup>#</sup>Present address: Global Station for Zoonosis Control, Global Institution for Collaborative  
17    Research and Education (GI-CoRE), Hokkaido University, N20 W10 Kita-  
18    ku, Sapporo, Japan

19    \*Corresponding author

20    Email: [gs12@sanger.ac.uk](mailto:gs12@sanger.ac.uk)

21

## 22    **Abstract**

23    Nematodes are economically important parasites of many livestock species, while others are  
 24    important human pathogens causing neglected tropical diseases. In both humans and animals,  
 25    anthelmintic drug administration is the main control strategy, but the emergence of drug-  
 26    resistant worms, has stimulated the development of alternative control approaches. Among  
 27    these, vaccination is considered to be a sustainable and cost efficient strategy. Currently,  
 28    Barbervax<sup>®</sup> for the ruminant strongylid *Haemonchus contortus* is the only registered subunit  
 29    vaccine for a helminth parasite, although a vaccine for the human hookworm *Necator*  
 30    *americanus* is undergoing clinical trials (HOOKVAC consortium). As both these vaccines  
 31    comprise a relatively small number of proteins there is potential for selection of nematodes  
 32    with altered sequence or expression of these antigens. Here we compared the genome and  
 33    transcriptome of *H. contortus* populations surviving following vaccination with Barbervax<sup>®</sup>  
 34    with worms from control animals. Barbervax<sup>®</sup> antigens are native integral membrane proteins  
 35    isolated from the brush border of the intestinal cells of the adult parasite and many of them  
 36    are proteases. Our findings provided no evidence of selective pressure on the specific vaccine  
 37    antigens in the surviving parasite populations. However, surviving parasites showed  
 38    increased expression of other proteases and regulators of lysosome trafficking, and displayed  
 39    up-regulated lipid storage and defecation abilities that may have circumvented the vaccine  
 40    effect. Despite the minimal evolutionary time monitored within this experiment, genomic  
 41    data suggest that a hard selective sweep mediated by the vaccine is unlikely. Implications for  
 42    potential human hookworm vaccines are discussed.

## 43    **Author Summary**

44    Gastrointestinal nematodes are important parasites of humans and livestock species. Their  
 45    high adaptive potential allows them to develop resistance to the anthelmintic drugs used to

control them. Vaccines could also select for resistance ultimately leading to vaccination failure. Here, we provide the first characterization of the genetic and transcriptomic composition of a worm population that survived following vaccination and challenge infection in comparison to a control population. Noticeably, no selection pressure was found on the vaccine targets. Instead, surviving parasites demonstrated increased expression of other genes involved in blood meal digestion that could facilitate survival in response to the vaccine.

53

## 54 **Introduction**

Gastrointestinal nematodes (GIN) are clinically and economically important parasites of humans [1] and livestock species [2]. Human GIN (e.g. hookworm, roundworm and whipworm) infect over one billion people worldwide, resulting in the loss of over four million disability-adjusted life years (DALYs) in 2013 [1]. In ruminants, parasitic nematode infections cost the global livestock industry billions of dollars annually in production losses and treatments [2]. GIN therefore impede both human health and wealth and are an aggravating factor of poverty [3].

Control of veterinary parasites has relied primarily on strategic drug administration strategies [4]. However the increase in anthelmintic resistance, particularly multidrug resistance, threatens the viability of the livestock industry in many regions of the world [2]. Similarly, control of human helminthiasis involves large-scale community treatment, which has resulted in reductions in GIN prevalence over the last 30 years [1, 5], but there is also the potential for anthelmintic drug failure [1]. Indeed recent surveys indicated a low or variable cure rate of human hookworm infection after benzimidazole treatment, with no reduction in anaemia in some endemic regions [6, 7].

70 It is unlikely that novel anthelmintic compounds will be approved at an equivalent  
 71 pace to the emergence of anthelmintic resistance [8]. Greater research effort is therefore  
 72 being directed at vaccine development for more sustainable GIN control in both veterinary  
 73 and human settings [1, 9]. Vaccines may be used alone or combined with drug treatment to  
 74 reduce the emergence of drug resistance [10]. In comparison to antimicrobial or anthelmintic  
 75 drugs, there are few examples of the development of resistance to vaccination in eukaryotic  
 76 pathogens [11]. However, the antigenic complexity and immunoregulatory capacity of  
 77 nematode parasites makes vaccine development a difficult task [9]. Only two vaccines are  
 78 currently commercially available: Barbervax<sup>®</sup> licensed in Australia in 2014 and comprising  
 79 parasite gut membrane glycoproteins of the ovine GIN *Haemonchus contortus* [12, 13], and  
 80 Bovilis huskvac<sup>®</sup>, an irradiated larval vaccine for the cattle lungworm *Dictyocaulus viviparus*  
 81 [14]. For the human hookworm *Necator americanus*, a phase 1 clinical vaccine trial has been  
 82 carried out [15].

83 While L3 larvae of *H. contortus* and *N. americanus* mediate infection via different  
 84 routes, adult worms of both of these clade V parasites reside in the digestive tract, where they  
 85 blood feed. Digestion of haemoglobin in haematophagous nematodes requires activity of  
 86 different proteolytic enzymes, including aspartic, cysteine and metallo-proteases and  
 87 exopeptidases [16]. The large expansion of protease gene families identified within the  
 88 genomes of *H. contortus* [17, 18] and *N. americanus* [19] supports the importance of these  
 89 enzymes in parasite biology. These blood digesting proteases are therefore valid targets for  
 90 vaccine control. Barbervax<sup>®</sup> is prepared from gut membrane extracts from *H. contortus* adult  
 91 worms and contains two major protease fractions, H11 and H-gal-GP [20]. H11 is a family of  
 92 microsomal aminopeptidases for which five isoforms have been identified so far [21, 22]. H-  
 93 gal-GP is a 1,000 kDa complex of four zinc metallopeptidases (MEP1-4) and two  
 94 pepsinogen-like aspartyl proteases (PEP-1 and PEP-2) [23], together with additional

95 components thought unlikely to be protective (thrombospondin, galectins and cystatin [24]).  
 96 Vaccination of sheep with H11 or H-gal-GP individually reduced worm burden and faecal  
 97 egg count by 70% and 95%, respectively [21, 22, 24-26]. Cysteine proteases HmCP-1,4 and  
 98 6, enriched from adult *H. contortus* gut membrane provided a lower level of protection [27].  
 99 The *N. americanus* vaccine comprises the Na-APR-1 aspartic protease combined with  
 100 glutathione-S-transferase-1 (Na-GST-1) which is involved in heme detoxification [1, 28, 29].  
 101 Both Barbervax<sup>®</sup> and the *N. americanus* vaccine induce antibodies that are ingested during  
 102 parasite blood-feeding and are thought to inhibit enzymatic activity and interfere with gut  
 103 function [24, 28]. Because its gut-membrane antigens are not exposed to the host immune  
 104 system during natural infection, Barbervax<sup>®</sup> relies on the induction of antibodies to “hidden”  
 105 antigens [24]. Therefore, it is speculated that the Barbervax<sup>®</sup> proteins are not under purifying  
 106 selective pressure during natural infection, but whether vaccine-induced immunity exerts any  
 107 selection on parasite genetics or influences gene expression is currently unknown.

108       The high level of genetic diversity observed in genomic datasets of *H. contortus* [17]  
 109 and other helminths underpins their capacity for adaptation and contributes to the evolution  
 110 of drug resistance [30]. It is clear that pathogens can evolve in response to other  
 111 interventions, including vaccination, in some cases leading to vaccine escape and failure [11,  
 112 31]. Given the limited number of antigens composing the *N. americanus* and *H. contortus*  
 113 vaccines, strong selection may arise in the field. Here we compare the genomes and  
 114 transcriptomes of *Haemonchus* adults surviving in Barbervax<sup>®</sup> vaccinated animals with  
 115 worms recovered from control animals post challenge infection. Identifying any effects that  
 116 vaccines may have on the diversity of helminth populations may guide their optimal use in  
 117 both veterinary and human settings.

118

## 119 **Materials and methods**

## Experimental design and collection of parasite material

Twelve six month old worm-free Texel cross lambs were allocated into groups of six, balanced for sex and weight. One group was injected subcutaneously with two doses of Barbervax<sup>®</sup> four weeks apart, whilst the second, control group was not vaccinated. All sheep were given a challenge infection of 5,000 *H. contortus* MHco3(ISE) L3 administered *per os* on the same day as the second vaccination. Fecal egg counts (FEC) were monitored twice weekly between days 17 and 29 post-challenge by a McMaster technique with a sensitivity of 50 eggs/g. Adult worms were recovered from each sheep at post-mortem 31 days post-challenge and worm volumes recorded. Antibody titres were measured by ELISA, with plates coated with Barbervax<sup>®</sup> (50 µl per well at 2 µg/ml). Serum samples were serially diluted (from 1/100 to 1/51200) in PBS/0.5% Tween and binding detected using mouse anti-sheep IgG (Clone GT-34, Sigma G2904; 1:2500 dilution) and rabbit anti-mouse IgG-HRP conjugate (Dako P0260; 1:1000 dilution). Antibody titres are expressed as the reciprocal of the end-point dilution resulting in an OD of  $\geq 0.1$  above the average negative control value. All experimental procedures were approved by the Moredun Research Institute Experiments and Ethics committee and carried out in accordance with the Animals (Scientific Procedures) Act of 1986.

## Extraction protocol, library preparation and sequencing

DNA and RNA sequencing was carried out on two pools of surviving *H. contortus* adult male worms per sheep according to the available number of worms. Six to twelve male worms were sequenced from each sheep. To avoid any confounding factors from eggs in females or differences in sex ratio between samples, only male worms were used for sequencing. In total, 49 and 52 worms that survived following challenge infection of the Barbervax

vaccinated sheep (V group) were analysed while 63 and 60 were picked from control sheep (C group), for DNA and RNA preparations, respectively.

Total RNA was extracted from the worms using a standard Trizol (Thermo Fisher Scientific, 15596026) protocol and libraries made with the Illumina TruSeq RNA preparation kit. DNA was extracted using the Wizard Genomic DNA Purification kit (Promega, A1120), following the manufacturer's instructions, apart from digestion with proteinase K in TEN buffer with SDS, followed by RNase A (Promega, A7973) treatment. RNA and DNA were sequenced using a HiSeq 2500 platform with v3 chemistry, generating a total 45Gb of DNA sequence.

### **Real-time PCR**

Total RNA was extracted from five female worms from the same populations as the sequenced males. 3 µg total RNA was used per oligo(dT) cDNA synthesis (SuperScript® III First-Strand Synthesis System, ThermoFisher, 18080051) with no-reverse transcriptase controls included for each sample. cDNA was diluted 1:100 for RT-qPCR and 1ul added to each reaction. RT-qPCR was carried out following the Brilliant III Ultra Fast SYBR QPCR Master Mix protocol (Agilent Technologies, 600882) and results analysed using MxPro qPCR Software, Version 4.10. Gene expression was normalised to *ama* (HCOI01464300) and *gpd* (HCOI01760600) [32]. Primer sequences are listed in Table S1.

### **Improved *H. contortus* assembly and corresponding gene model**

The *H. contortus* MHco3.ISE reference genome assembly used for this study was a snapshot of the latest version as of 14/11/2014. This assembly consists of 6,668 scaffolds with a total assembly length of 332,877,166 bp; of which 22,769,937 bp are sequence gaps. The N50 scaffold length is 5,236,391 bp and N90 length is 30,845 bp. Specifically for this project, preliminary gene models were annotated on this assembly by transferring the gene models

from the published (v1.0) genome assembly [17] using RATT [33] with default parameters, and with a *de novo* approach using Augustus v2.6.1 [34] with exon boundary 'hints' from the RNAseq data described in [17], mapped against the new reference genome in the same way as in this previous paper.

## **RNAseq data handling and differential expression analysis**

RNAseq data were mapped onto the reference genome using a gene index built with Bowtie2 [35] and TopHat v2.1.0 [36] with maximal intron length of 50 Kbp and an inner mate distance of 30 bp that identified 48.8% of the reads being mapped unambiguously to a gene feature. Counts of reads spanning annotated gene features were subsequently determined with HTSeq v0.6.0 [37].

To ensure our biological conclusions are not sensitive to details of the statistical methods used, we implemented two different analysis frameworks for the RNA-seq count data, using the DESeq2 v1.12.4 framework [38] and the *voom* function as implemented in the LIMMA package v3.28.21 [39] in R v3.3.1 [40]. Genes found to be significantly differentially expressed (DE, adjusted p-value <5%) by both VOOM and DESeq2 analyses were retained. A gene ontology enrichment analysis was performed using the TopGO package v2.26.0 [41]. Gene identifiers of the vaccine core components, namely MEP-3 [42], MEP-1,2,4, PEP-1 [43] and PEP-2 [23] as well as H11, were retrieved via a BLAST search of their nucleotide sequence against the *H. contortus* MHco3.ISE reference assembly [17] in WormBase ParaSite [44]. The expression levels of candidate housekeeping genes [32] were also retrieved using the gene identifiers associated with their GenBank records (Table 2).

## **Genomic sequence data mapping and SNP calling procedures**



Reads were mapped onto the reference genome using SMALT v0.7.4 (<http://www.sanger.ac.uk/science/tools/smalt-0>) software with a minimum 90% identity cut-off (-y 0.9), a maximum insert size of 2000bp and a k-mer length of 13 with a step-size of 2 between adjacent k-mers. For computational efficiency and to avoid mapping to multiple scaffolds representing haplotypes of the same loci, only the 140 biggest contigs (those over 100 Kbp in length) were included in the analysis. These spanned 83.89% of the genome assembly (279.24 Mbp). Duplicated and bad quality reads (mapping quality below 20, unmapped reads and reads with an-mapped mate) were filtered out with Samtools v0.1.19 [45], yielding an average of  $3.2 \times 10^9$  reads (Table 2) for each pool. Local realignment around indels was performed with the GATK software v3.4 [46, 47]. A first set of SNPs was called using mpileup and computing allele counts for each site after filtering out indels with Popoolation2 [48]. The GATK HaplotypeCaller workflow was also implemented for calling variant sites in each pool after specifying a ploidy of 2 and implementing a hard filtering of raw variants ( $QD < 2$ ,  $DP > 468.33$ ,  $FS > 21.72$ ,  $MQ < 33.07$ ,  $MQRankSum < -1.76$ ,  $ReadPosRankSum < -2.16$ ). In addition, SNPs found in less than 11 out of the 12 pools were discarded. Applying this hard filtering framework to every scaffold resulted in a total of 5,291,725 SNPs, and subsequently only variants present in both the GATK and popoolation2 sets of variant calls were retained for analysis ( $n = 4,807,726$  SNPs in total). SNP calling was performed for all 12 available pools of worms, but given the lower amount of genomic data available (a single lane), one sample (V\_6) was discarded for further analyses to avoid biases in allele frequency estimates.

## **Estimation of allele frequencies and site frequency spectra**

Maximum-likelihood estimates for allele frequencies were derived following the framework of [49] using a python script available upon request. Only SNPs for which the null hypothesis

of a single allele being present was rejected (*i.e.* showing a p-value below 0.05, in every pool considered) were retained for subsequent analyses ( $n = 198,045$  SNPs). A principal components analysis was run on allele frequency estimates using the *prcomp()* function implemented in the R software.

### **Search for genomic selection footprints, gene ontology analysis and simulations**

Departures from neutrality were investigated by genome-wide estimation of Tajima's  $D$ ,  $\pi$ , and Watterson's  $\theta$  using the popoolation2 software [48] and 10kbp wide overlapping sliding windows. Pairwise- $F_{ST}$  statistics between pool of worms were estimated along the genome using the popoolation2 software [48] using a 10Kbp wide sliding window with a 1 Kbp overlap (44,668 tests), or using a gene-wise estimation (6,194 tests). The  $F_{ST}$  statistics is a measure of the similarity between allelic frequencies from different populations [50]. Outlier  $F_{ST}$  values are encountered when diversifying selection is acting on particular loci, in contrast to other regions submitted to random evolution, *i.e.* genetic drift. In our setting, pairwise  $F_{ST}$  between C samples (C-C) measures the genetic differentiation occurring when pools of worms are undergoing a bottleneck linked to the immune response in unvaccinated sheep, either by chance or because of some immune selection. High  $F_{ST}$  between C and V pools (C-V) should point at regions affected by vaccine response exposure. Finally, high  $F_{ST}$  between V samples (V-V) may originate from different genetic samplings associated with survival to the vaccine response, *e.g.* different genes at stake. Identification of the regions specifically put under selection by the sheep vaccine response relies on comparison of the observed  $F_{ST}$  values to a null distribution of  $F_{ST}$  under random drift or the application of empirical thresholds. This latter option was favoured as the former requires prior information on the selection coefficient and population genetic parameters that are unknown. Therefore, to identify the regions specifically put under selection by the sheep vaccine response, we

selected regions that showed an outlying C-V  $F_{ST}$  defined as being significantly higher than C-V estimates (at least two standard deviations of the average C-V  $F_{ST}$ ) and significantly higher than outlying C-C  $F_{ST}$  estimates (average C-C plus three standard deviations of the mean). In addition and because we were only interested in the regions specifically constrained by the host vaccinal response, these regions also had to exhibit low differentiation among C samples (less than two standard deviations of the mean).

Genes and their promoter regions (2000 bp up- and down-stream) overlapping windows fulfilling these conditions were retrieved to perform a gene ontology analysis with the GOWINDA software, running 100,000 simulations and reporting GO terms with a false discovery rate below 5% [51]. A neighbour-joining tree based on Reynold's distance [52] between pools was generated using the *nj()* function of the *ape* package.

To assess the impact of the experimental design on the observed  $F_{ST}$  values within and among experimental groups, forward simulations were implemented with the simuPOP software [53]. A population of 55,000 individuals was simulated and split into 11 populations of 5,000, 20 to 25% of which randomly surviving to adult stage in *H. contortus* [54]. A marker under selection conferring between 95 and 99% chance of dying to recessive homozygotes and 1% to other genotypes in the vaccinated populations was modelled. This marker also gave a 1% chance of dying to the recessive homozygotes and 0% to other genotypes in the unvaccinated population. A neutral marker was also modelled. Finally, 20 of the surviving individuals were randomly sampled to compute pair-wise  $F_{ST}$  estimates based on the virulence-associated and neutral markers. For each starting allele frequency, 10,000 simulations were run.

## Results

### Vaccination greatly reduces faecal egg counts in vaccinated sheep

Parasitological data confirmed a significant reduction in *H. contortus* infection following Barbervax vaccination. Over the course of the trial, vaccinated sheep (Group V) shed significantly fewer eggs (mean  $390 \pm 639$  eggs per gram faeces (epg), Fig 1A, Table S2) than the control group (Group C) given the same challenge infection dose without prior vaccination (mean  $5,914 \pm 2,628$  epg), representing a 15-fold decrease (Wilcoxon test,  $p = 0.002$ ). Vaccinated sheep contained fewer worms, indicated by the significantly lower worm volume collected at necropsy compared to control sheep ( $2.8 \text{ mL} \pm 1.9$  versus  $6.7 \text{ mL} \pm 3.5$ ; Table S2). Among the V group, V\_5 showed an outlying egg excretion over the course of the trial (1,647 epg at necropsy; upper 95% confidence interval limit of 861 epg estimated after 1,000 bootstraps), suggesting a relatively suboptimal vaccine response in this animal. This is supported by the lower antibody titre of this sheep, relative to the other Barbervax vaccinated animals, at day 28 post-challenge infection (Fig 1B).

## **Fig 1. Faecal egg counts, worm volume and anti-Barbervax IgG titer of individual animals**

Fig 1A Faecal egg counts from each of the 12 sheep in the trial were plotted for each available time point. The plot shows an 15-fold difference in egg excretion between vaccinated and control sheep on day 29 post challenge infection.

Fig 1B Faecal egg count measured at necropsy plotted against respective anti-Barbervax<sup>®</sup> vaccine IgG titer, showing a negative correlation between vaccine response and egg count.

## **Limited but unexpected genetic differentiation between worm populations in different hosts**

Whole genome sequencing was carried out on groups of male worms recovered from vaccinated or control animals post-challenge infection. Genome sequence data was examined

for any evidence that the vaccination-induced reduction in FEC, and in adult worm burden, had an impact on the genetics of the worm populations recovered. SNP calling and allele frequency based selection procedures yielded an average of 1,855,712 SNPs per pool of worms (Table 1), of which 198,045 sites spanning 130 contigs were polymorphic in every pool. Sample V\_6 whose coverage was lower was discarded for population genetic parameter inferences to avoid biases in allele frequency estimates (Table 1).

**Table 1. Available transcriptomic and genomic data for each pool of worms**

| Sample | RNAseq library size (M reads) | DNAseq library size (bp) | DNAseq mean coverage | % of bases with cov.>15 | No. SNPs identified | Tajima's <i>D</i> |
|--------|-------------------------------|--------------------------|----------------------|-------------------------|---------------------|-------------------|
| C_1    | 11,617,210                    | 3,710,647,378            | 14.44                | 45.2                    | 1,996,265           | -0.36             |
| C_2    | 11,983,512                    | 3,376,010,836            | 13.14                | 38.8                    | 1,855,906           | -0.34             |
| C_3    | 11,397,785                    | 3,675,872,370            | 14.3                 | 44                      | 2,013,325           | -0.3              |
| C_4    | 8,411,138                     | 3,624,001,304            | 14.1                 | 43.4                    | 1,958,571           | -0.35             |
| C_5    | 10,485,931                    | 3,782,001,835            | 14.72                | 45.5                    | 2,061,175           | -0.39             |
| C_6    | 11,627,840                    | 3,231,531,531            | 12.57                | 36.1                    | 1,832,316           | -0.31             |
| V_1    | 11,673,469                    | 2,876,605,295            | 11.19                | 29.1                    | 1,592,790           | -0.31             |
| V_2    | 11,147,222                    | 2,943,617,550            | 11.45                | 30                      | 1,683,880           | -0.35             |
| V_3    | 11,876,035                    | 2,833,188,035            | 11.02                | 27.9                    | 1,609,184           | -0.3              |
| V_4    | 12,298,240                    | 3,394,736,282            | 13.21                | 38.9                    | 1,888,056           | -0.35             |
| V_5    | 11,459,627                    | 3,580,556,572            | 13.93                | 42.4                    | 1,921,368           | -0.29             |
| V_6    | 6,122,970                     | 138,2085,315             | 5.38                 | 1.8                     | n/a                 | n/a               |

Tajima's *D* estimates, that measure departure from neutral evolution, were neither significantly different from 0 (expected under neutral mutation-drift equilibrium) nor differed between the two groups of sheep (Table 1). Principal component analysis (PCA) of the SNP data also showed little systematic difference between C and V samples (Figs 2A, 2B). This finding was also supported by estimated genome-wide  $F_{ST}$  statistics. We used the genome-wide average  $F_{ST}$  between pairs of worm pools to quantify the level of genetic differentiation observed between pools, comparing pairs surviving in vaccinates (V-V comparisons), pairs of control samples (C-C comparisons) and between pairs of vaccine and control pools (C-V comparisons). These statistics showed similar, moderate differentiation among (average C-V  $F_{ST}$   $0.059 \pm 0.013$ ) and within experimental groups (average C-C  $F_{ST}$   $0.054 \pm 0.016$ , average

V-V  $F_{ST}$   $0.062 \pm 0.017$ ) (Fig 2C). These values suggested some independent evolution within each sheep (Fig 2C), even in the absence of vaccine exposure. Indeed, some level of genetic differentiation occurred between C populations for neutral alleles, *i.e.* not controlling for the vaccine survival, whereas 90% of our simulated  $F_{ST}$  estimates in this case fell below 0.01 (Fig 3A). While all populations showed higher  $F_{ST}$  than expected from the simulations under pure genetic drift, the impact of the vaccine selection could not be differentiated from the selection occurring in control sheep.

## **Fig 2. Genomic structure of worm populations according to their experimental group**

Fig 2A. An overview of the folded site frequency spectra, *i.e.* the distribution of minor allele frequency values ranging from 0 to 0.5, within each pool of worms. Allele frequency estimates have been derived as reported in [49] and SNPs with significant allelic frequencies have been selected for each pool. This plot demonstrates an enrichment in intermediate allele frequencies in the V populations consistent with a stronger bottleneck.

Fig 2B. Principal components analysis of genotype data with their relative contributions showing individual pool coordinates and experimental group centres of gravity. Ellipses encompassing the variance of each experimental group largely overlap, favouring a lack of a common genomic divergence process operating between experimental groups.

Fig 2C. Neighbor-joining tree derived from mean pair-wise  $F_{ST}$  estimate between pools. The tree supports the lack of agreement between differentiation occurring among pools and the experimental groups. It also illustrates the independent evolution of pools recovered from the most extremely bottlenecked populations.

## **Fig 3. Results of the simulated pair-wise $F_{ST}$ estimates**

Fig 3A. The dispersion of the average pair-wise  $F_{ST}$  estimates within control (red), vaccinated (green) or among groups (blue) for a marker under neutral evolution with initial frequencies of 0.2 and 0.5 and across the various possible virulence-associated marker frequencies.

Fig 3B. The dispersion of the pair-wise  $F_{ST}$  estimates based on a marker controlling for survival to the vaccine response.

However, SNP data also provided indications of a stronger bottleneck occurring in the V samples. First, V populations exhibited significantly fewer segregating sites in agreement with a reduced genetic diversity ( $p=0.04$ , Table 2); these sites were enriched for variants segregating at intermediate allele frequencies in the V populations, also consistent with a loss of rare variants in these pools due to a bottleneck (Fig 2A). Second, V-V and C-V differentiation measured by  $F_{ST}$  statistics was significantly higher than between control samples (Student's t test,  $p < 2.2 \times 10^{-16}$ ). The slightly higher V-V differentiation could in principal either be a result of stronger drift in these populations or a wide-ranging selective response to vaccination, both of which agree with the stronger bottleneck observed from parasitological measures. Simulations confirmed that this pattern of higher V-V  $F_{ST}$  values, and similar  $F_{ST}$  for C-C and C-V comparisons is expected (Fig 3B) in the presence of selection due to the vaccine response.

The overall higher differentiation observed within worms surviving vaccination was mostly driven by differences between V\_5 (least protected) and a cluster of three samples (V\_1, 2 and 3), that all showed the strongest effect of vaccination, and so potentially the strongest genetic bottleneck (Fig 2C). This variation in allele frequency across sites among survivors suggests that the vaccine response did not exert its selection pressure on the same sites across all V samples, *i.e.* survival following vaccine exposure could be mediated by different genomic regions.

361

# 362 **Vaccination induces a slight genetic bottleneck but no detectable hard selective sweep**

363 Despite this evidence of different evolutionary pathways between V samples from different  
 364 hosts, we investigated whether any regions of the genome were consistently different  
 365 between C and V samples (Fig 4B). We identified 145 windows (Fig 4B, red dots) showing  
 366 high C-V differentiation (mean  $F_{ST}$   $0.096 \pm 0.007$ ) but little or no C-C differentiation (mean  
 367  $F_{ST}$   $0.04 \pm 0.006$ ). This pattern is compatible with differentiation mediated by the vaccine  
 368 response that would affect allelic variance of V in comparison to C. Overall, these windows  
 369 were on 11 contigs and defined 21 discrete regions putatively under selection following  
 370 vaccination. These windows tend to show high V-V differentiation (mean  $F_{ST}$   $0.088 \pm 0.019$ )  
 371 hence suggesting that any selection applied by the vaccine response may differ between  
 372 hosts.

373

## 374 **Fig 4. Distribution of average pair-wise $F_{ST}$ estimates and differentially expressed genes** 375 **along the genome**

376 A. Expression fold-change of the differentially expressed genes were plotted against their  
 377 genomic positions. Dot size correlates their fold-change magnitude and colour corresponds to  
 378 higher (red) or lower (green) expression in V compared to C worms.

379 B. Mean pair-wise  $F_{ST}$  estimates have been plotted against each site, ordered by contig and  
 380 position and for each possible pair-wise group comparison, *i.e.* within pools of worms  
 381 recovered from control sheep (C-C in green), within pools of worms recovered from  
 382 vaccinated sheep (V-V, in purple) or among groups (C-V, in blue). Bigger red dots represent  
 383 sites thought to have been differentiated as a result of the vaccine response. Similar  
 384 differentiation values are observed throughout the considered sites, indicative of a lack of  
 385 outstanding differentiation occurring on a particular set of loci.



386

387       Using our simulation results, we can estimate the probability of observing a 10kb  
388 window with  $F_{ST}$  values as extreme as these 145 (the false discovery rate; FDR) under a  
389 neutral model of random drift and no selection. The estimated FDR of between 0.0028 to  
390 0.0058 (depending on initial allele frequency) would imply between 125 and 259 false-  
391 positive windows in the 44,668 tested windows; although only between 12 and 26 false  
392 positive windows are expected when linkage disequilibrium between markers within 10 Kbp  
393 is taken into account (based on unpublished estimates of linkage in *H. contortus*). This  
394 suggests that most, but probably not all, of the observed C-V differentiation results from  
395 random processes.

396       The gene ontology analysis run on the full list of genes retrieved from differentiated  
397 windows highlighted a few GO terms independently associated with three unique genes  
398 (Table S3) involved in different biological processes, *i.e.* necrotic cell death in relation to  
399 dUTP metabolic process (HCOI02115600), structural integrity of muscle (HCOI00179400)  
400 or hormone activity (HCOI01942200). In addition, an astacin metallopeptidase M12A gene  
401 (HCOI01292600) was found among the 47 genes lying within the defined differentiated  
402 genomic windows.

403       Overall gene-wise  $F_{ST}$  estimates show the same trends as those observed for the  
404 genome-wide estimates, *i.e.* equivalent amount of differentiation between populations (mean  
405 pair-wise  $F_{ST}$  of 0.06; 0.054; 0.063 and standard deviation 0.019; 0.024; 0.026 for C-V, C-C,  
406 and V-V estimates, respectively Table S4). Applying the same framework, to select for  
407 putatively selected markers, highlighted 11 genes including a Beige/BEACH coding gene  
408 (HCOI02096300) orthologous to the LYSosomal Trafficking regulator protein (*lyst-1*) gene  
409 in *C.elegans* (Table S4).

410

## **Transcriptional response of worms to host vaccination is dominated by higher expression of proteases and protease inhibitors**

We next investigated any changes in *H. contortus* gene expression in worms surviving in vaccinated sheep relative to those surviving in controls. On average 11M (standard deviation of 1.79M) reads were available for each library (Table 2). In PCA of the normalized RNA-seq read counts, the first two axes explained 53% of the total variation, 37% of which was resolved along the 1<sup>st</sup> axis that separated the experimental groups (Fig S1). Two pools of worms sampled from control sheep, C\_4 and C\_6, showed atypical behaviour that was resolved along the 2<sup>nd</sup> PCA axis (Fig S1). These samples were discarded from the dataset for subsequent analyses, resulting in a comparison of 6 V samples and 4 C samples.

We found 52 genes significantly differentially expressed (DE; adjusted p-value < 0.05) between the two experimental groups, with six genes exhibiting a fold change >4 and 34 genes showing a fold change >2 (Figs 5, S2, Table S5). Adult worm survival following vaccination was associated with an increase in expression of most of the DE genes, *i.e.* 46 out of 52. Among the top six DE genes, the only down-regulated gene was a glycoside hydrolase domain-containing protein (HCOI00569100, Table 2, Fig 5A). Four of the most highly up-regulated genes encoded proteins containing peptidase domains (HCOI01945600, HCOI01283800, HCOI01736400 Table 2, Fig 5A), or a peptidase inhibitor I4 domain (HCOI01549900, Table 2, Fig 5A), while one gene was unannotated (HCOI01623600). Expression of the peptidases (HCOI01945600, HCOI01283800, HCOI01736400) was validated by quantitative RT-PCR in female worms from the same population as the sequenced males, and confirmed a two to three-fold over-expression of each mRNA in worms surviving in vaccinated sheep compared to controls (Fig 5B).

**Fig 5. Expression level of the top differentially expressed genes within each experimental group (5A) and associated correlation with faecal egg count in control populations (5B)**

A. A boxplot for every gene that exhibited an absolute log-transformed fold change of 2 between the experimental conditions.

B. Fold change in expression level of selected genes, by qRT-PCR, shown relative to C control population.

C. log<sub>10</sub>-transformed transcript counts measured in control samples plotted against faecal egg count (in eggs/g) at 29 days post-infection for each of the most differentially expressed genes. Regression lines with associated 95% confidence intervals are also provided.

To test whether the six most DE genes were associated with increased fitness under control conditions, we estimated the correlation between their normalised transcript counts and FEC in the control C worm populations. Spearman correlation ranged from -0.15 to 0.15 with p-value >0.6, rejecting this association. Furthermore these genes exhibited low transcript counts in control C populations (ranging from 1.5 to 8,476 counts for HCOI01623600 and HCOI01283800 respectively, Fig 5C, Table S5), suggesting that their higher expression in worms from group V may be triggered or selected for by the vaccine exposure.

453 **Table 2. Gene of interest expression levels, fold change and associated p-values**

|                              | Gene ID      | Base mean | logFC<br>DESeq2 | adj. P<br>DESeq2 | logFC<br>VOOM | adj. P<br>VOOM  | Correlation<br>with FEC31 | WormBase ParaSite Gene description                                                                                | <i>C. elegans</i><br>orthologue | Candidate<br>Gene Name | Genbank Acc.<br>Number |
|------------------------------|--------------|-----------|-----------------|------------------|---------------|-----------------|---------------------------|-------------------------------------------------------------------------------------------------------------------|---------------------------------|------------------------|------------------------|
| Top differentially expressed | HCOI00569100 | 24.21     | -2.39           | <b>2.40E-13</b>  | -5.16         | <b>4.55E-03</b> | 0.63 (0.05)               | Glycoside hydrolase domain containing protein [U6P060]                                                            | n/a                             | n/a                    | n/a                    |
|                              | HCOI01945600 | 2000.03   | 2.02            | <b>2.33E-16</b>  | 2.39          | <b>9.83E-04</b> | -0.64 (0.05)              | Peptidase A1 domain containing protein [U6PP66]                                                                   | pcl, Bace                       | n/a                    | n/a                    |
|                              | HCOI01623600 | 23.12     | 2.03            | <b>2.05E-09</b>  | 4.21          | <b>6.77E-03</b> | -0.79 (0.01)              | n/a                                                                                                               | n/a                             | n/a                    | n/a                    |
|                              | HCOI01283800 | 38840.11  | 2.15            | <b>3.58E-15</b>  | 2.79          | <b>1.28E-03</b> | -0.76 (0.01)              | Peptidase C1A domain containing protein [U6P6R9]                                                                  | CtsB1                           | n/a                    | n/a                    |
|                              | HCOI01549900 | 1104.78   | 2.20            | <b>6.42E-16</b>  | 2.86          | <b>1.31E-03</b> | -0.73 (0.02)              | Protease inhibitor I4 domain containing protein [U6PNP0]                                                          | srp-1,2,3,6,7,8                 | n/a                    | n/a                    |
|                              | HCOI01736400 | 2678.92   | 2.49            | <b>4.60E-31</b>  | 3.01          | <b>7.91E-05</b> | -0.81 (0.004)             | n/a                                                                                                               | CtsB1                           | n/a                    | n/a                    |
| Vaccine Antigen              | HCOI01993300 | 4049.71   | 0.30            | 3.09E-01         | 0.32          | 3.46E-01        | n/a                       | Propeptide domain containing protein [U6PXI5]                                                                     | n/a                             | pep-2                  | AJ577754.1             |
|                              | HCOI01993500 | 13499.65  | 0.34            | 2.65E-01         | 0.35          | 3.06E-01        | n/a                       | Propeptide and Peptidase A1 domain containing protein [U6PQD5]                                                    | n/a                             | pep-1                  | AF079402.1             |
|                              | HCOI00348800 | 8859.39   | 0.47            | <b>1.56E-02</b>  | 0.51          | 1.14E-01        | n/a                       | Peptidase M13 domain containing protein [U6NMI3]                                                                  | n/a                             | mep-2                  | AF080117.1             |
|                              | HCOI01333400 | 9325.90   | 0.59            | <b>3.88E-02</b>  | 0.62          | 1.64E-01        | n/a                       | Peptidase M13 domain containing protein [U6PHP6]                                                                  | nep-9, nep-20                   | mep-3                  | AF080172.1             |
|                              | HCOI02032800 | 2207.13   | 0.71            | <b>1.25E-02</b>  | 0.90          | 5.97E-02        | n/a                       | Peptidase M1 domain containing protein [U6PYE0]                                                                   | T07F10.1                        | h11                    | FJ481146.1             |
|                              | HCOI00308300 | 18250.90  | 0.73            | <b>4.82E-04</b>  | 0.78          | 5.85E-02        | n/a                       | Peptidase M13 domain containing protein [U6NME0]                                                                  |                                 | mep-1                  | AF102130.1             |
|                              | HCOI00631000 | 5690.45   | 0.77            | <b>2.40E-04</b>  | 0.81          | 5.97E-02        | n/a                       |                                                                                                                   |                                 | mep-4                  | AF132519.1             |
| Housekeeping genes           | HCOI00909100 | 5753.25   | -0.41           | 5.29E-01         | -0.60         | 3.93E-01        | n/a                       | Nematode fatty acid retinoid binding domain containing protein [U6NYW0]                                           | n/a                             | far                    | CDJ86885.1             |
|                              | HCOI00117100 | 1379.12   | 0.08            | 9.64E-01         | 0.07          | 7.96E-01        | n/a                       | Superoxide dismutase [Cu-Zn] [U6NGP5]                                                                             | n/a                             | sod                    | CDJ80830.1             |
|                              | HCOI01760600 | 24868.64  | 0.08            | 8.59E-01         | 0.08          | 7.92E-01        | n/a                       | Glyceraldehyde-3-phosphate dehydrogenase (inferred by orthology to a human protein) [Source:UniProtKB;Acc:P04406] | n/a                             | gpd                    | CDJ92718.1             |
|                              | HCOI01743600 | 194.02    | 0.13            | 9.13E-01         | 0.14          | 7.28E-01        | n/a                       | RNA recognition motif domain containing protein [U6NLP1]                                                          | n/a                             | ncbp                   | CDJ82645.1             |
|                              | HCOI01464300 | 974.31    | 0.32            | 3.24E-01         | 0.35          | 3.06E-01        | n/a                       | DNA-directed RNA polymerase [U6PFA6]                                                                              | n/a                             | ama                    | CDJ91461.1             |

Interestingly, 14 genes among the 52 DE gene set encoded peptidases or peptidase inhibitors exemplified by the significant enrichment for serine-type (6 out of 78 annotated genes,  $p=9.6 \times 10^{-8}$ ) and cysteine-type peptidase (8 out of 98 annotated genes,  $p=2.8 \times 10^{-10}$ ) GO terms (Table S5). This shift toward peptidase activity is also consistent with down-regulation of the gamma interferon-inducible lysosomal thiol reductase (*GILT*, HCOI02049600), which is known to catalyse the reduction of cysteine proteases (Table S5).

Higher expression of two genes involved in the anti-microbial response, the *Lys-8* coding gene (HCOI00041100) associated with lysozyme formation, and the anti-microbial peptide theromacin coding gene (HCOI00456500), was also found in worms surviving in vaccinated animals. A proteinase inhibitor (HCOI01591500) and a prolyl-carboxypeptidase coding gene (HCOI01624100) showing 99.6% similarity with contortin 2 (Genbank CAM84574.1, BLASTP, e-value=0) also showed significantly greater expression in the V group (Table S5).

#### **Some of the transcriptomic differences could result from the vaccine selection pressure**

To reconcile both transcriptomic and genomic data together, average  $F_{ST}$  across the coding sequence of the gene and neutrality test statistics were estimated for the set of differentially expressed genes. Most of the differentially expressed genes were not associated with high  $F_{ST}$  values (Fig S3A), although two protease coding genes, namely a peptidase C1A coding gene (HCOI00658500) and a cathepsin-like protease (HCOI01736400), were found among the 25% most differentiated genes (high C-V  $F_{ST}$ ) between C and V populations (Fig S3A). In addition, a gene encoding a peptidase A1 (aspartic protease, HCOI01945600) showed a significant contrast in Tajima's  $D$  estimate between the experimental groups with a pattern consistent with selection occurring in the vaccine survivors (Fig S3B, S3C;  $p=0.03$ ;  $D=0.21$  and  $-0.40$  in C and V groups, respectively).

## Vaccine antigen coding genes are not differentially expressed between experimental groups

Importantly we found that most of the genes encoding the core components of the Barbervax<sup>®</sup> vaccine (MEPs, PEPs, Aminopeptidases) were not significantly differentially expressed between V and C worms or where significant, showed slight over-expression in the V worm population (Table 2, Fig 6A). In addition, the SNPs located within or in the vicinity of the vaccine antigen coding-genes, *i.e.* for pep-1, hmCP-1, hmCP-4 and cystatin coding genes showed similar distribution within the two groups (Fig 6B) and thus showed neither evidence for genetic differentiation among groups (Fig 6C; gene-wise  $F_{ST}$  estimates available for mep-1 and hmCP-1 only, Table S3) nor for selection (Fig 6D).

## Fig 6. Expression level, allele frequencies, differentiation and neutrality test estimates for the vaccine antigen coding genes

Figure 6A shows the normalized transcript counts for every vaccine antigen coding gene.

Figure 6B displays allelic frequencies for every SNP found within vaccine antigen coding genes.

Figure 6C demonstrates the relationship between gene-wise  $F_{ST}$  estimates and fold change in expression between the two experimental groups. For the purpose of this plot and to unify the color scale across  $F_{ST}$  and fold change values, absolute fold change values have been scaled by 20. Figure 6D provides the dispersion of Tajima's D test for the set of vaccine antigen coding genes.

## Discussion

In comparison to the development of antimicrobial or anthelmintic resistance, vaccine resistance has rarely been reported [11]. These contrasting findings may relate both to the prophylactic use of vaccines, which prevent the spread of resistant mutants among hosts, and the multiplicity of pathways targeted by the host immune response following vaccination [11]. However, highly diverse populations, such as *H. contortus* likely encompass a wide range of genotypes that could be differentially selected, ultimately leading to vaccine resistance through replacement [55-57].

Resistance to all but the newest anthelmintic drugs is common and widespread amongst gastrointestinal nematode parasites of ruminants. Barbervax<sup>®</sup>, which is specific for *H. contortus*, is the only vaccine registered for a gut dwelling nematode of any host. While this vaccine provides a useful level of protection mediated mainly by reducing pasture contamination, a small proportion of worms do survive vaccination. Here, we investigated whether the genome and transcriptome of these survivors differed from control worms. Whilst this study focuses on a species of veterinary significance, our findings also have relevance to other species, such as the human hookworm *N. americanus*, as vaccines against both parasites target antigens involved in blood meal digestion [24, 29, 58].

Populations exposed to evolutionary forces, such as an effective vaccine, tend to differentiate from each other at the genomic level through changes in allele frequencies, either randomly (drift) or under the influence of environmental constraints favouring particular alleles (selection). The resulting variation in allele frequency among populations can be measured by  $F_{ST}$  statistics [50, 59], while departure from neutral mutation-drift equilibrium can be identified by positive or negative values of Tajima's  $D$  statistic. Our observations suggest that the sheep immune response did not impose a high level of selection pressure on the worm population, with differentiation largely driven by random genetic drift, as indicated by

Tajima's  $D$  estimates, which were not significantly different from 0. The low level of differentiation both amongst and within groups also support similar population histories between experimental groups. Analysis of the genes encoding the vaccine targets, against which one might have expected selection to operate, showed no departure from neutrality in either experimental group and the genetic differentiation measured for a H-Gal-GP fraction member that passed the quality filter of the analysis, *i.e.* MEP-3 (HCOI00308300), was both low and identical between groups. Several explanations can be proposed. Firstly, the sampling strategy associated with the experimental design may have induced extra drift in the control population therefore resulting in some levels of differentiation within control worm populations, as only ten to 20 individuals of the surviving worm populations per sheep were randomly sampled for sequencing. In addition, even if the overall population size of *H. contortus* is huge [30], it faces a high level of stochasticity at each step of its life cycle, *i.e.* sampling on pasture [60] and host-mediated bottleneck, as recent meta-analysis estimates suggested that 25% of ingested infective larvae ingested fail to establish [54]. However, simulation predictions that take into account both the life cycle and sampling design suggest that  $F_{ST}$  estimates based on neutral markers should be around 0, ruling out this hypothesis and perhaps indicating that control populations were actually under slight selection pressure mediated by the sheep immune system.

Furthermore, the short evolutionary time scale (a single generation of selection) may be insufficient to detect differential selection between control worms and those surviving the vaccine. Under this framework, our window filtering strategy should have resulted in 0.28 to 0.58 % of signals falsely declared differentiated, but a maximal power to detect true survival-associated markers of 2%. It is therefore difficult to disentangle drift from selection and the implementation of the “evolve and resequence” approach, in which vaccine selection is applied over multiple generations of evolution of a worm population, could favour the



identification of sites undergoing selection [61]. Controlled infection of sheep by *H. contortus* followed by vaccination is a reasonably tractable experiment that could offer additional insights and serve as a model for other host-nematode systems.

Predictions from the simulation results suggest that observed  $F_{ST}$  estimates would be compatible with survival-associated alleles segregating at intermediate frequencies, *i.e.* 0.3. If true, it would suggest that subsequent selection for these putative alleles with intermediate frequencies should be relatively easy in the field, especially because *H. contortus* populations are optimised for the spreading of beneficial alleles, *i.e.* high gene flow and genetic diversity [30]. In a different setting, such as human hookworm, characterized by both sporadic gene flow and fluctuating population size [62], evolution is expected to be mainly driven by random sampling of genetic variants, rendering selection less efficient [63]. Such a moderate allele frequency should however limit its random loss over time. This prediction still remains to be validated after at least one genomic candidate is found and a critical assessment of its genetic variability is performed across a wide range of field samples.

Notably, and perhaps counterintuitively, no evidence was found that increased expression of vaccine targets could mediate survival after vaccine exposure. Indeed, both experimental groups exhibited similar levels of vaccine antigen transcripts. In contrast one metallopeptidase and one exopeptidase, belonging to the same functional families [64] as the vaccine MEP (M13 peptidase) and H11 (M1 peptidase), were over-expressed in the vaccine survivors. However, we have no direct evidence that these can compensate for the function of the peptidases within the vaccine. Instead, survival following Barbervax<sup>®</sup> vaccination was associated with the higher expression of a limited subset of genes, enriched in those coding for peptidases, most of which were cysteine peptidases. Differential tuning of a GILT-like gene, *i.e.* down-regulated in worms surviving the vaccine response, would also support proteolytic function as an important feature for vaccine survival, as this pleiotropic gene is

known to modulate cysteine protease activity and stability [65]. In addition, there was an indication of higher selection pressure on a *lyst-1* orthologue, a regulator of endosomal trafficking in *C. elegans* polarized epithelial cells [66], that may share the same function in *H. contortus* and thus contribute to efficient processing of protein material from the intestinal lumen. This suggests that regulation of the proteolytic pathways in vaccine survivors results in improved survival. While the precise function of cysteine peptidases is hard to infer *in silico*, current knowledge from *in vitro* studies points to their role in the proteolytic cascade responsible for degrading haemoglobin or immunoglobulin G [16]. Perhaps worms that over-express these proteins may either better maintain blood coagulation and digestion, or they may degrade host IgG to evade the vaccine response, or some combination of both. Indeed the vaccine is proposed to disrupt digestion in the worm gut by inactivating the intestinal proteases it targets. Processing of ingested proteins by an alternative proteolytic pathway may improve the survival and/or fecundity of worms suffering dietary restriction. In addition, the over-expression of a myo-inositol-1 phosphate synthase in vaccine survivors may also support this theory as this gene is known to act on lipid storage [67] and in the defecation cycle [68], both critical in the digestion process, and hence impacting worm growth and lifespan.

Interestingly, the most highly differentially expressed genes show a low level of expression in worms from the control group, suggesting that the vaccine response induced their overexpression in the vaccine survivors or alternatively, that the vaccine selects for natural variation in expression of these genes. Additional transcriptomic evaluation of the offspring of each worm subpopulation, before and after vaccine exposure, would help confirm this observation and distinguish between a genetic effect on gene expression and a regulatory response to vaccine-induced immunity. It would also provide hints about the heritability of this trait.

While the differences in gene expression associated with worm survival in vaccinates indicate that the parasite population may have the potential to ameliorate the vaccine response, we were unable to identify significant genetic changes following a single round of immune selection. The human hookworm vaccine is composed of two antigens and it is probable that alternative pathways may help this species survive the vaccine response by similar mechanisms as described here. As the reported experimental vaccine challenges in dogs [28] resulted in lower reduction in worm burden (in the range of 30%), less selection pressure should be applied on these two targets. It would be interesting to determine whether the 46 orthologues identified in hookworms for our 52 differentially expressed candidates have any association with vaccine survival in this setting.

In conclusion, our data suggest that surviving parasite populations are able to optimize their proteolytic machinery, involving both peptidases and regulators of lysosome trafficking, and display better lipid storage or defecation abilities or both which may enhance survival in the face of a robust vaccine-induced immune response. However, genomic data indicate that the evolution of parasite populations is mostly driven by genetic drift rather than selection for vaccine resistance. Our findings provide encouragement for the future implementation of anti-helminth vaccines and could be extended to other nematode systems where vaccines are much needed. While our experiment, with a single generation of vaccine challenge, has limitations in power to detect selection due to the vaccine response, the absence of detectable selection in this setting is encouraging and suggests that vaccine survival will not evolve quickly. Further validation of these findings should be implemented in a more powerful experiment using an “evolve and resequencing” approach to contrast changes in allele frequencies in vaccinated and unvaccinated populations through time, across multiple generations of vaccine challenge.

## Acknowledgements

We thank Stephen Doyle for advice and comments on the manuscript and the biological services staff at MRI for their expert animal care.

## References

1. Hotez PJ, Strych U, Lustigman S, Bottazzi ME. Human anthelmintic vaccines: Rationale and challenges. *Vaccine*. 2016;34(30):3549-55. doi: 10.1016/j.vaccine.2016.03.112. PubMed PMID: 27171753.
2. Kaplan RM, Vidyashankar AN. An inconvenient truth: Global worming and anthelmintic resistance. *Veterinary Parasitology*. 2012;186(1-2):70-8. doi: 10.1016/j.vetpar.2011.11.048. PubMed PMID: WOS:000303183200010.
3. Rist CL, Garchitorena A, Ngonghala CN, Gillespie TR, Bonds MH. The Burden of Livestock Parasites on the Poor. *Trends Parasitol*. 2015;31(11):527-30. doi: 10.1016/j.pt.2015.09.005. PubMed PMID: 26604161.
4. McKellar QA, Jackson F. Veterinary anthelmintics: old and new. *Trends Parasitol*. 2004;20(10):456-61. doi: 10.1016/j.pt.2004.08.002. PubMed PMID: 15363438.
5. Clarke NE, Clements AC, Doi SA, Wang D, Campbell SJ, Gray D, et al. Differential effect of mass deworming and targeted deworming for soil-transmitted helminth control in children: a systematic review and meta-analysis. *Lancet*. 2017;389(10066):287-97. doi: 10.1016/S0140-6736(16)32123-7. PubMed PMID: 27979381.
6. Keiser J, Utzinger J. Efficacy of current drugs against soil-transmitted helminth infections: systematic review and meta-analysis. *JAMA*. 2008;299(16):1937-48. doi: 10.1001/jama.299.16.1937. PubMed PMID: 18430913.
7. Soukhathammavong PA, Sayasone S, Phongluxa K, Xayaseng V, Utzinger J, Vounatsou P, et al. Low efficacy of single-dose albendazole and mebendazole against hookworm and effect on concomitant helminth infection in Lao PDR. *PLoS Negl Trop Dis*. 2012;6(1):e1417. doi: 10.1371/journal.pntd.0001417. PubMed PMID: 22235353; PubMed Central PMCID: PMC3250499.
8. Geary TG, Conder GA, Bishop B. The changing landscape of antiparasitic drug discovery for veterinary medicine. *Trends Parasitol*. 2004;20(10):449-55. PubMed PMID: WOS:000224257600001.
9. Hewitson JP, Maizels RM. Vaccination against helminth parasite infections. *Expert Rev Vaccines*. 2014;13(4):473-87. doi: 10.1586/14760584.2014.893195. PubMed PMID: 24606541.
10. Lee BY, Bacon KM, Bailey R, Wiringa AE, Smith KJ. The potential economic value of a hookworm vaccine. *Vaccine*. 2011;29(6):1201-10. doi: 10.1016/j.vaccine.2010.12.004. PubMed PMID: 21167860; PubMed Central PMCID: PMC3038553.
11. Kennedy DA, Read AF. Why does drug resistance readily evolve but vaccine resistance does not? *Proc Biol Sci*. 2017;284(1851). doi: 10.1098/rspb.2016.2562. PubMed PMID: 28356449.
12. Bassetto CC, Amarante AF. Vaccination of sheep and cattle against haemonchosis. *J Helminthol*. 2015;89(5):517-25. doi: 10.1017/S0022149X15000279. PubMed PMID: 25891536.

- 665 13. Kearney PE, Murray PJ, Hoy JM, Hohenhaus M, Kotze A. The 'Toolbox' of strategies for  
666 managing *Haemonchus contortus* in goats: What's in and what's out. *Vet Parasitol.* 2016;220:93-107.  
667 doi: 10.1016/j.vetpar.2016.02.028. PubMed PMID: 26995728.
- 668 14. McKeand JB. Vaccine development and diagnostics of *Dictyocaulus viviparus*. *Parasitology.*  
669 2000;120 Suppl:S17-23. PubMed PMID: 10874707.
- 670 15. Brelsford JB, Plieskatt JL, Yakovleva A, Jariwala A, Keegan BP, Peng J, et al. Advances in  
671 neglected tropical disease vaccines: Developing relative potency and functional assays for the Na-  
672 GST-1/Alhydrogel hookworm vaccine. *PLoS Negl Trop Dis.* 2017;11(2):e0005385. doi:  
673 10.1371/journal.pntd.0005385. PubMed PMID: 28192438; PubMed Central PMCID:  
674 PMC5325600.
- 675 16. Williamson AL, Brindley PJ, Knox DP, Hotez PJ, Loukas A. Digestive proteases of blood-  
676 feeding nematodes. *Trends Parasitol.* 2003;19(9):417-23. PubMed PMID: 12957519.
- 677 17. Laing R, Kikuchi T, Martinelli A, Tsai IJ, Beech RN, Redman E, et al. The genome and  
678 transcriptome of *Haemonchus contortus*, a key model parasite for drug and vaccine discovery.  
679 *Genome Biol.* 2013;14(8):R88. doi: 10.1186/gb-2013-14-8-r88. PubMed PMID: 23985316; PubMed  
680 Central PMCID: PMC4054779.
- 681 18. Schwarz EM, Korhonen PK, Campbell BE, Young ND, Jex AR, Jabbar A, et al. The genome and  
682 developmental transcriptome of the strongylid nematode *Haemonchus contortus*. *Genome Biol.*  
683 2013;14(8):R89. doi: 10.1186/gb-2013-14-8-r89. PubMed PMID: 23985341; PubMed Central PMCID:  
684 PMC4053716.
- 685 19. Tang YT, Gao X, Rosa BA, Abubucker S, Hallsworth-Pepin K, Martin J, et al. Genome of the  
686 human hookworm *Necator americanus*. *Nat Genet.* 2014;46(3):261-9. doi: 10.1038/ng.2875.  
687 PubMed PMID: 24441737; PubMed Central PMCID: PMC3978129.
- 688 20. Smith WD, Pettit D, Smith SK. Cross-protection studies with gut membrane glycoprotein  
689 antigens from *Haemonchus contortus* and *Teladorsagia circumcincta*. *Parasite Immunology.*  
690 2001;23(4):203-11. doi: DOI 10.1046/j.1365-3024.2001.00375.x. PubMed PMID:  
691 WOS:000168049000005.
- 692 21. Munn EA, Smith TS, Smith H, James FM, Smith FC, Andrews SJ. Vaccination against  
693 *Haemonchus contortus* with denatured forms of the protective antigen H11. *Parasite Immunol.*  
694 1997;19(6):243-8. PubMed PMID: 9364553.
- 695 22. Roberts B, Antonopoulos A, Haslam SM, Dicker AJ, McNeilly TN, Johnston SL, et al. Novel  
696 expression of *Haemonchus contortus* vaccine candidate aminopeptidase H11 using the free-living  
697 nematode *Caenorhabditis elegans*. *Vet Res.* 2013;44:111. doi: 10.1186/1297-9716-44-111. PubMed  
698 PMID: 24289031; PubMed Central PMCID: PMC3978129.
- 699 23. Smith WD, Skuce PJ, Newlands GF, Smith SK, Pettit D. Aspartyl proteases from the intestinal  
700 brush border of *Haemonchus contortus* as protective antigens for sheep. *Parasite Immunol.*  
701 2003;25(11-12):521-30. doi: 10.1111/j.0141-9838.2004.00667.x. PubMed PMID: 15053773.
- 702 24. Knox DP, Redmond DL, Newlands GF, Skuce PJ, Pettit D, Smith WD. The nature and  
703 prospects for gut membrane proteins as vaccine candidates for *Haemonchus contortus* and other  
704 ruminant trichostrongyloids. *Int J Parasitol.* 2003;33(11):1129-37. PubMed PMID: 13678629.
- 705 25. Newton SE, Munn EA. The development of vaccines against gastrointestinal nematode  
706 parasites, particularly *Haemonchus contortus*. *Parasitol Today.* 1999;15(3):116-22. PubMed PMID:  
707 10322325.
- 708 26. LeJambre LF, Windon RG, Smith WD. Vaccination against *Haemonchus contortus*:  
709 performance of native parasite gut membrane glycoproteins in Merino lambs grazing contaminated  
710 pasture. *Vet Parasitol.* 2008;153(3-4):302-12. doi: 10.1016/j.vetpar.2008.01.032. PubMed PMID:  
711 18337013.
- 712 27. Knox DP, Smith SK, Redmond DL, Smith WD. Protection induced by vaccinating sheep with a  
713 thiol-binding extract of *Haemonchus contortus* membranes is associated with its protease  
714 components. *Parasite Immunol.* 2005;27(4):121-6. doi: 10.1111/j.1365-3024.2005.00750.x. PubMed  
715 PMID: 15910420.

28. Loukas A, Bethony JM, Mendez S, Fujiwara RT, Goud GN, Ranjit N, et al. Vaccination with recombinant aspartic hemoglobinase reduces parasite load and blood loss after hookworm infection in dogs. *PLoS Med.* 2005;2(10):e295. doi: 10.1371/journal.pmed.0020295. PubMed PMID: 16231975; PubMed Central PMCID: PMCPMC1240050.
29. Zhan B, Perally S, Brophy PM, Xue J, Goud G, Liu S, et al. Molecular cloning, biochemical characterization, and partial protective immunity of the heme-binding glutathione S-transferases from the human hookworm *Necator americanus*. *Infect Immun.* 2010;78(4):1552-63. doi: 10.1128/IAI.00848-09. PubMed PMID: 20145100; PubMed Central PMCID: PMCPMC2849424.
30. Gilleard JS, Redman E. Genetic Diversity and Population Structure of *Haemonchus contortus*. *Adv Parasitol.* 2016;93:31-68. doi: 10.1016/bs.apar.2016.02.009. PubMed PMID: 27238002.
31. Brueggemann AB, Pai R, Crook DW, Beall B. Vaccine escape recombinants emerge after pneumococcal vaccination in the United States. *PLoS Pathog.* 2007;3(11):e168. doi: 10.1371/journal.ppat.0030168. PubMed PMID: 18020702; PubMed Central PMCID: PMCPMC2077903.
32. Lecova L, Ruzickova M, Laing R, Vogel H, Szotakova B, Prchal L, et al. Reliable reference gene selection for quantitative real time PCR in *Haemonchus contortus*. *Mol Biochem Parasitol.* 2015;201(2):123-7. doi: 10.1016/j.molbiopara.2015.08.001. PubMed PMID: 26255779.
33. Otto TD, Dillon GP, Degraeve WS, Berriman M. RATT: Rapid Annotation Transfer Tool. *Nucleic Acids Res.* 2011;39(9):e57. doi: 10.1093/nar/gkq1268. PubMed PMID: 21306991; PubMed Central PMCID: PMCPMC3089447.
34. Stanke M, Steinkamp R, Waack S, Morgenstern B. AUGUSTUS: a web server for gene finding in eukaryotes. *Nucleic Acids Res.* 2004;32(Web Server issue):W309-12. doi: 10.1093/nar/gkh379. PubMed PMID: 15215400; PubMed Central PMCID: PMCPMC441517.
35. Langmead B, Salzberg SL. Fast gapped-read alignment with Bowtie 2. *Nat Methods.* 2012;9(4):357-9. doi: 10.1038/nmeth.1923. PubMed PMID: 22388286; PubMed Central PMCID: PMCPMC3322381.
36. Trapnell C, Pachter L, Salzberg SL. TopHat: discovering splice junctions with RNA-Seq. *Bioinformatics.* 2009;25(9):1105-11. doi: 10.1093/bioinformatics/btp120. PubMed PMID: 19289445; PubMed Central PMCID: PMCPMC2672628.
37. Anders S, Pyl PT, Huber W. HTSeq--a Python framework to work with high-throughput sequencing data. *Bioinformatics.* 2015;31(2):166-9. doi: 10.1093/bioinformatics/btu638. PubMed PMID: 25260700; PubMed Central PMCID: PMCPMC4287950.
38. Love MI, Huber W, Anders S. Moderated estimation of fold change and dispersion for RNA-seq data with DESeq2. *Genome Biol.* 2014;15(12):550. doi: 10.1186/s13059-014-0550-8. PubMed PMID: 25516281; PubMed Central PMCID: PMCPMC4302049.
39. Law CW, Chen Y, Shi W, Smyth GK. voom: Precision weights unlock linear model analysis tools for RNA-seq read counts. *Genome Biol.* 2014;15(2):R29. doi: 10.1186/gb-2014-15-2-r29. PubMed PMID: 24485249; PubMed Central PMCID: PMCPMC4053721.
40. R Core Team. R: A Language and Environment for Statistical Computing. Vienna: R Foundation for Statistical Computing; 2016.
41. Alexa A, Rahnenfuhrer J. topGO: Enrichment Analysis for Gene Ontology. 2016.
42. Smith WD, Smith SK, Pettit D, Newlands GF, Skuce PJ. Relative protective properties of three membrane glycoprotein fractions from *Haemonchus contortus*. *Parasite Immunol.* 2000;22(2):63-71. PubMed PMID: 10652118.
43. Britton C, Redmond DL, Knox DP, McKerrow JH, Barry JD. Identification of promoter elements of parasite nematode genes in transgenic *Caenorhabditis elegans*. *Mol Biochem Parasitol.* 1999;103(2):171-81. PubMed PMID: 10551361.
44. Howe KL, Bolt BJ, Shafie M, Kersey P, Berriman M. WormBase ParaSite - a comprehensive resource for helminth genomics. *Mol Biochem Parasitol.* 2016. doi: 10.1016/j.molbiopara.2016.11.005. PubMed PMID: 27899279.

766 45. Li H, Handsaker B, Wysoker A, Fennell T, Ruan J, Homer N, et al. The Sequence  
767 Alignment/Map format and SAMtools. *Bioinformatics*. 2009;25(16):2078-9. doi:  
768 10.1093/bioinformatics/btp352. PubMed PMID: 19505943; PubMed Central PMCID:  
769 PMCPMC2723002.

770 46. DePristo MA, Banks E, Poplin R, Garimella KV, Maguire JR, Hartl C, et al. A framework for  
771 variation discovery and genotyping using next-generation DNA sequencing data. *Nat Genet*.  
772 2011;43(5):491-8. doi: 10.1038/ng.806. PubMed PMID: 21478889; PubMed Central PMCID:  
773 PMCPMC3083463.

774 47. McKenna A, Hanna M, Banks E, Sivachenko A, Cibulskis K, Kernytsky A, et al. The Genome  
775 Analysis Toolkit: a MapReduce framework for analyzing next-generation DNA sequencing data.  
776 *Genome Res*. 2010;20(9):1297-303. doi: 10.1101/gr.107524.110. PubMed PMID: 20644199; PubMed  
777 Central PMCID: PMCPMC2928508.

778 48. Kofler R, Pandey RV, Schlotterer C. PoPoolation2: identifying differentiation between  
779 populations using sequencing of pooled DNA samples (Pool-Seq). *Bioinformatics*. 2011;27(24):3435-  
780 6. doi: 10.1093/bioinformatics/btr589. PubMed PMID: 22025480; PubMed Central PMCID:  
781 PMCPMC3232374.

782 49. Lynch M, Bost D, Wilson S, Maruki T, Harrison S. Population-genetic inference from pooled-  
783 sequencing data. *Genome Biol Evol*. 2014;6(5):1210-8. doi: 10.1093/gbe/evu085. PubMed PMID:  
784 24787620; PubMed Central PMCID: PMCPMC4040993.

785 50. Holsinger KE, Weir BS. Genetics in geographically structured populations: defining,  
786 estimating and interpreting  $F_{ST}$ . *Nat Rev Genet*. 2009;10(9):639-50. doi: 10.1038/nrg2611. PubMed  
787 PMID: 19687804; PubMed Central PMCID: PMCPMC4687486.

788 51. Kofler R, Schlotterer C. Gowinda: unbiased analysis of gene set enrichment for genome-wide  
789 association studies. *Bioinformatics*. 2012;28(15):2084-5. doi: 10.1093/bioinformatics/bts315.  
790 PubMed PMID: 22635606; PubMed Central PMCID: PMCPMC3400962.

791 52. Reynolds J, Weir BS, Cockerham CC. Estimation of the coancestry coefficient: basis for a  
792 short-term genetic distance. *Genetics*. 1983;105(3):767-79. PubMed PMID: 17246175; PubMed  
793 Central PMCID: PMCPMC1202185.

794 53. Peng B, Kimmel M. simuPOP: a forward-time population genetics simulation environment.  
795 *Bioinformatics*. 2005;21(18):3686-7. doi: 10.1093/bioinformatics/bti584. PubMed PMID: 16020469.

796 54. Saccareau M, Sallé G., Robert-Granié C., Duchemin, T., Jacquet P., Blanchard, A., Cabaret, J.,  
797 Moreno, C.R. Meta-analysis of the parasitic phase traits of *Haemonchus contortus* infection in sheep.  
798 *Parasites & Vectors*. 2017;In press.

799 55. Barnett TC, Lim JY, Soderholm AT, Rivera-Hernandez T, West NP, Walker MJ. Host-pathogen  
800 interaction during bacterial vaccination. *Curr Opin Immunol*. 2015;36:1-7. doi:  
801 10.1016/j.coi.2015.04.002. PubMed PMID: 25966310.

802 56. Martcheva M, Bolker BM, Holt RD. Vaccine-induced pathogen strain replacement: what are  
803 the mechanisms? *J R Soc Interface*. 2008;5(18):3-13. doi: 10.1098/rsif.2007.0236. PubMed PMID:  
804 17459810; PubMed Central PMCID: PMCPMC2405901.

805 57. Weinberger DM, Malley R, Lipsitch M. Serotype replacement in disease after pneumococcal  
806 vaccination. *Lancet*. 2011;378(9807):1962-73. doi: 10.1016/S0140-6736(10)62225-8. PubMed PMID:  
807 21492929; PubMed Central PMCID: PMCPMC3256741.

808 58. Ranjit N, Zhan B, Hamilton B, Stenzel D, Lowther J, Pearson M, et al. Proteolytic degradation  
809 of hemoglobin in the intestine of the human hookworm *Necator americanus*. *J Infect Dis*.  
810 2009;199(6):904-12. PubMed PMID: 19434933.

811 59. Wright S. The genetical structure of populations. *Ann Eugen*. 1951;15(4):323-54. PubMed  
812 PMID: 24540312.

813 60. Cabaret J, Mangeon N, Gruner L. Estimation of uptake of digestive tract strongyle larvae  
814 from pasture, using oesophagus fistulated sheep. *Vet Parasitol*. 1986;19(3-4):315-20. PubMed PMID:  
815 3705424.

61. Turner TL, Miller PM. Investigating natural variation in *Drosophila* courtship song by the evolve and resequence approach. *Genetics*. 2012;191(2):633-42. doi: 10.1534/genetics.112.139337. PubMed PMID: 22466043; PubMed Central PMCID: PMC3374323.
62. Hawdon JM, Li T, Zhan B, Blouin MS. Genetic structure of populations of the human hookworm, *Necator americanus*, in China. *Mol Ecol*. 2001;10(6):1433-7. PubMed PMID: 11412366.
63. Charlesworth B. Fundamental concepts in genetics: effective population size and patterns of molecular evolution and variation. *Nat Rev Genet*. 2009;10(3):195-205. doi: 10.1038/nrg2526. PubMed PMID: 19204717.
64. Rawlings ND, Barrett AJ, Bateman A. MEROPS: the peptidase database. *Nucleic Acids Res*. 2010;38(Database issue):D227-33. doi: 10.1093/nar/gkp971. PubMed PMID: 19892822; PubMed Central PMCID: PMC2808883.
65. Rausch MP, Hastings KT. Diverse cellular and organismal functions of the lysosomal thiol reductase GILT. *Mol Immunol*. 2015;68(2 Pt A):124-8. doi: 10.1016/j.molimm.2015.06.008. PubMed PMID: 26116226; PubMed Central PMCID: PMC4623965.
66. de Souza N, Vallier LG, Fares H, Greenwald I. SEL-2, the *C. elegans* neurobeachin/LRBA homolog, is a negative regulator of lin-12/Notch activity and affects endosomal traffic in polarized epithelial cells. *Development*. 2007;134(4):691-702. doi: 10.1242/dev.02767. PubMed PMID: 17215302.
67. Ashrafi K, Chang FY, Watts JL, Fraser AG, Kamath RS, Ahringer J, et al. Genome-wide RNAi analysis of *Caenorhabditis elegans* fat regulatory genes. *Nature*. 2003;421(6920):268-72. doi: 10.1038/nature01279. PubMed PMID: 12529643.
68. Tokuoka SM, Saiardi A, Nurrish SJ. The mood stabilizer valproate inhibits both inositol- and diacylglycerol-signaling pathways in *Caenorhabditis elegans*. *Mol Biol Cell*. 2008;19(5):2241-50. doi: 10.1091/mbc.E07-09-0982. PubMed PMID: 18287529; PubMed Central PMCID: PMC2366867.

## Supporting information

### S1 Fig. Principal component analysis (PCA) of transcript counts

Pools of worm (worm?) coordinates were plotted against first two components of transcript counts variance. First PCA axis explains 36% of total variance and relates to differences between the two considered experimental groups, *i.e.* worms exposed to the vaccine response (V) or the control group (C).

### Fig S2. Number of differentially expressed genes found by each of the two implemented methods

Total number of significantly differentially expressed genes found by at least one of the two methods (DESeq2, VOOM, or both) are plotted according to their regulation pattern, *i.e.* up or



down-regulated in the vaccine survivors, to their estimated fold change, i.e.  $\log_2FC > 2$ , 1 or 0.

### **Fig S3. Differentiation and neutrality test estimates for the differentially expressed genes**

Figure S3A shows the relationship between gene-wise  $F_{ST}$  estimates and fold change in expression between the two experimental groups. For the purpose of this plot and to unify the color scale across  $F_{ST}$  and fold change values, absolute fold change values have been scaled by 20. Figure S3B provides the dispersion of neutrality test statistics, namely  $\pi$ ,  $\theta$  and Tajima's  $D$  for the set of differentially expressed genes. Fold change absolute value correlated with the dot size while its magnitude is indicated by colors ranging from green (down-regulated in vaccine survivors) to red (over-expressed in vaccine survivors).

### **S1 Table. List of primer sequences used for qPCR validation**

### **S2 Table. Faecal egg count and worm volumes recovered at necropsy**

### **S3 Table. Significantly enriched GO terms associated with the 145 differentiated windows**

### **S4 Table. Gene-wise average pair-wise $F_{ST}$ estimates**

### **S5 Table. Complete list of differentially expressed genes**

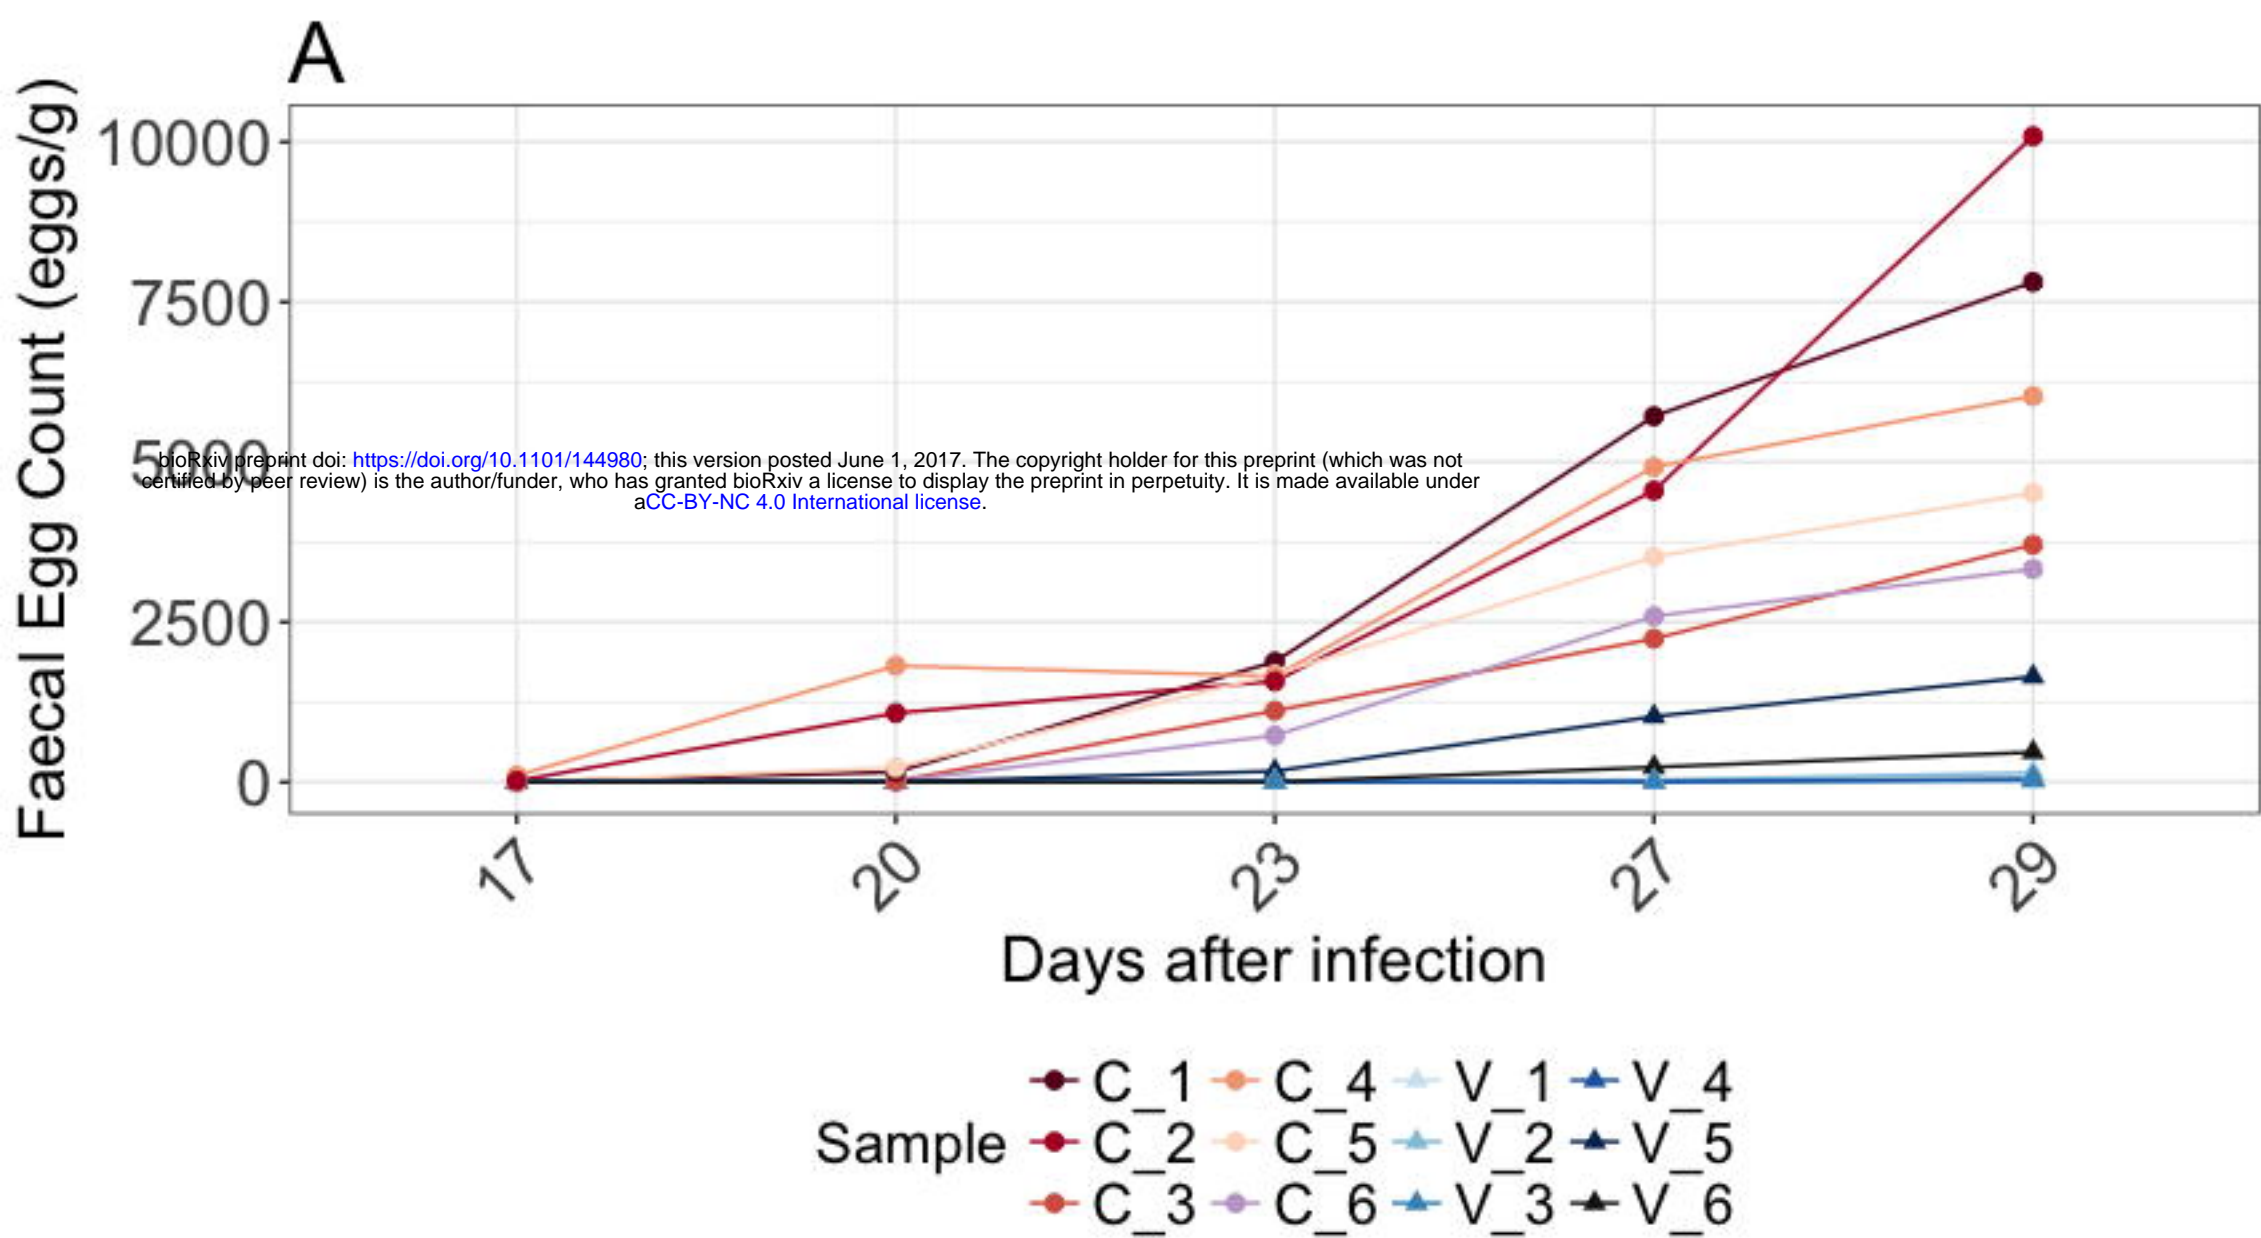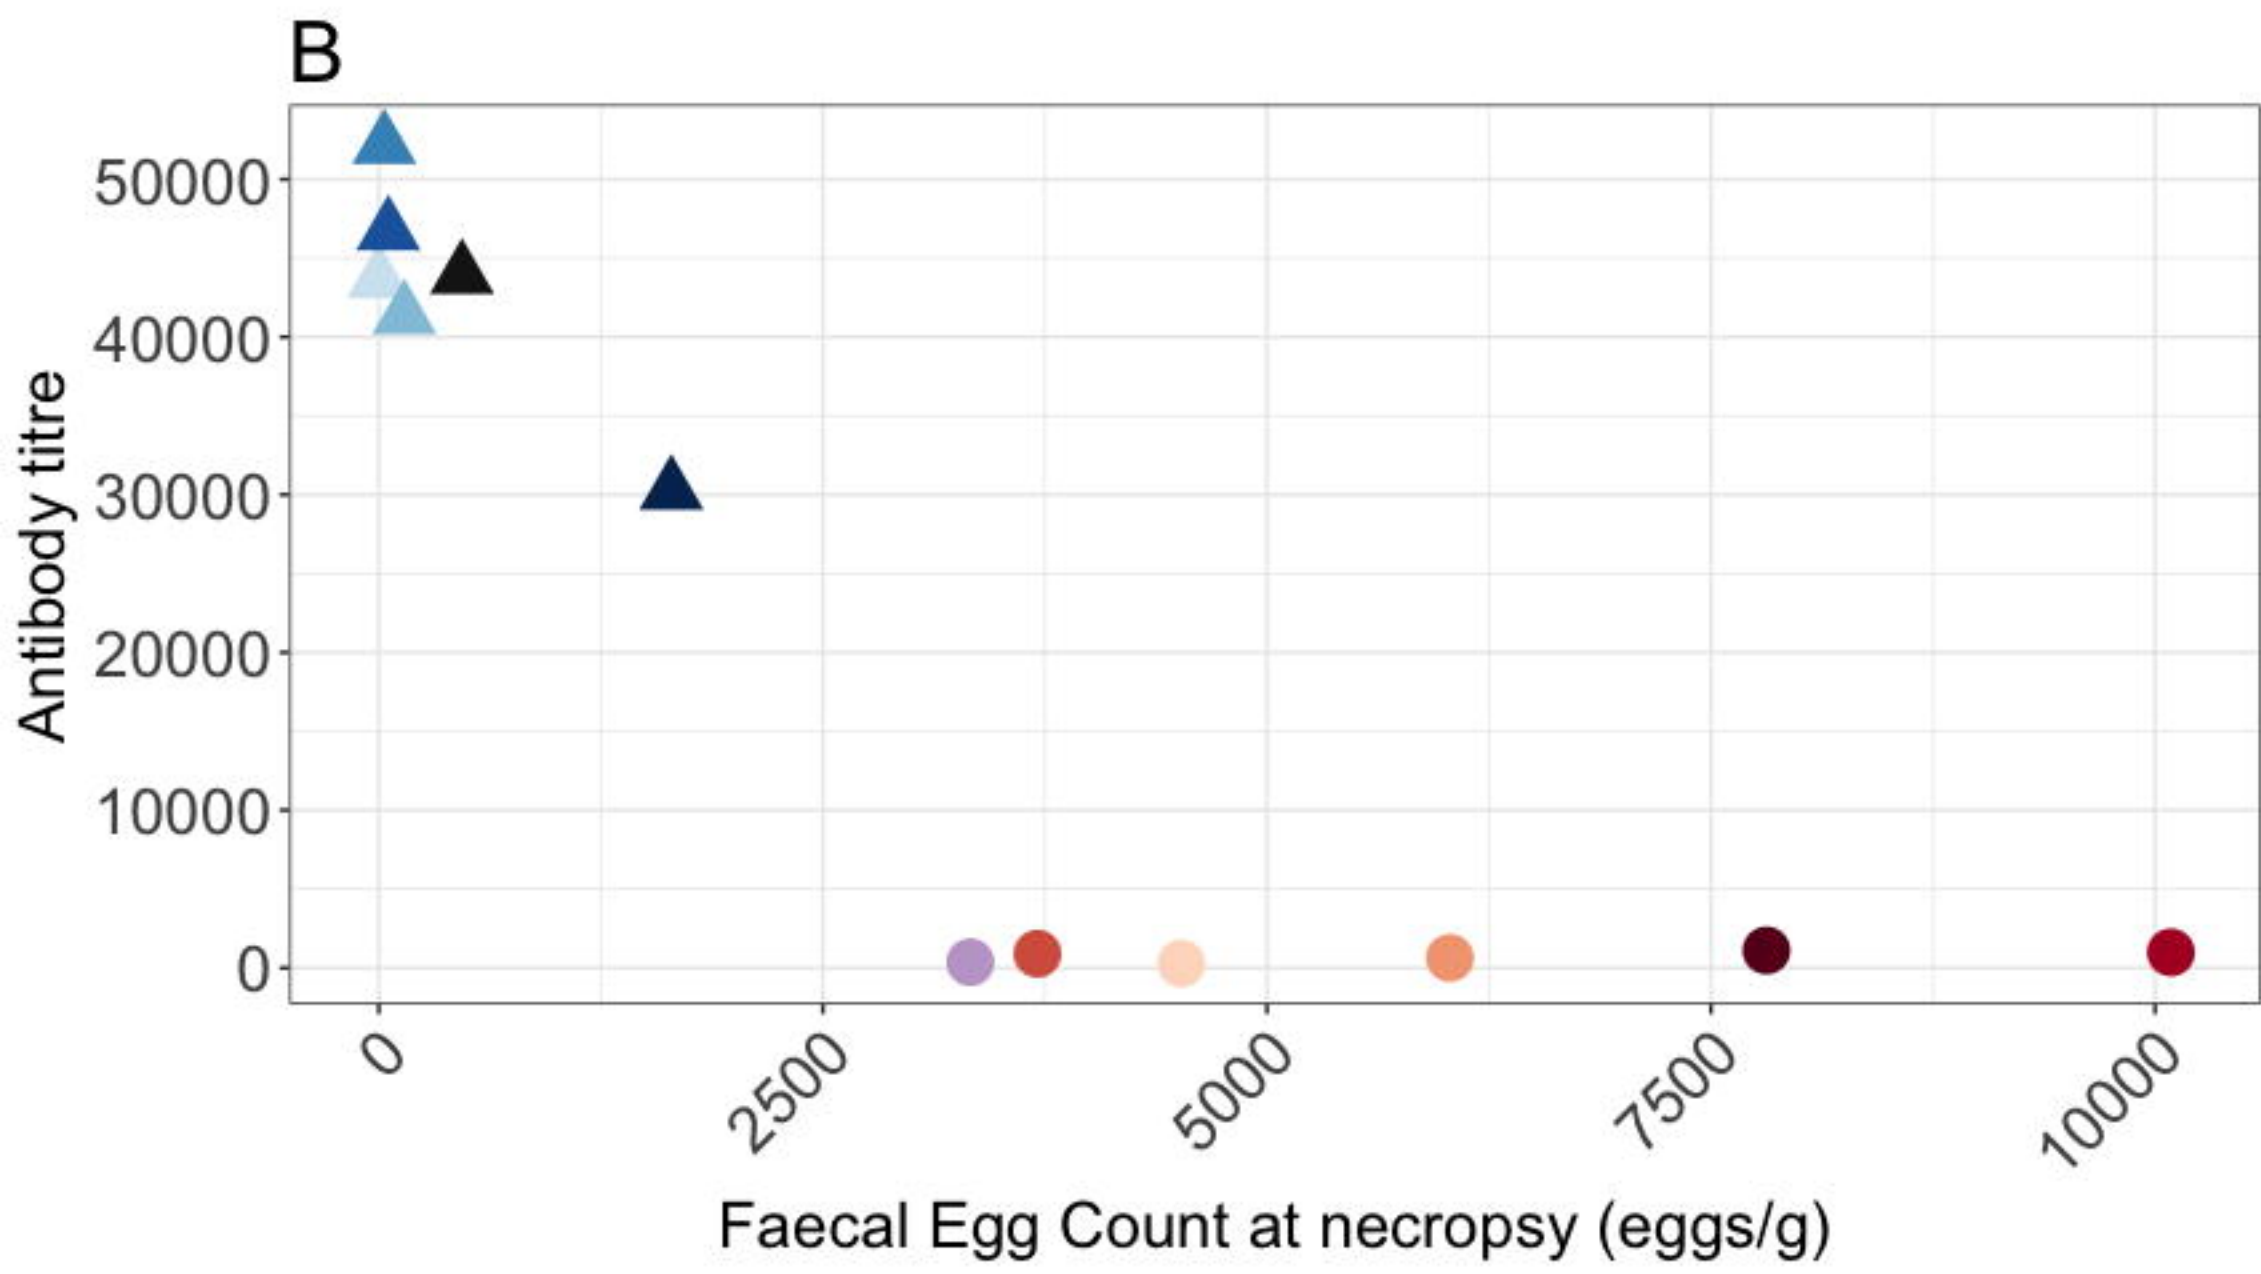

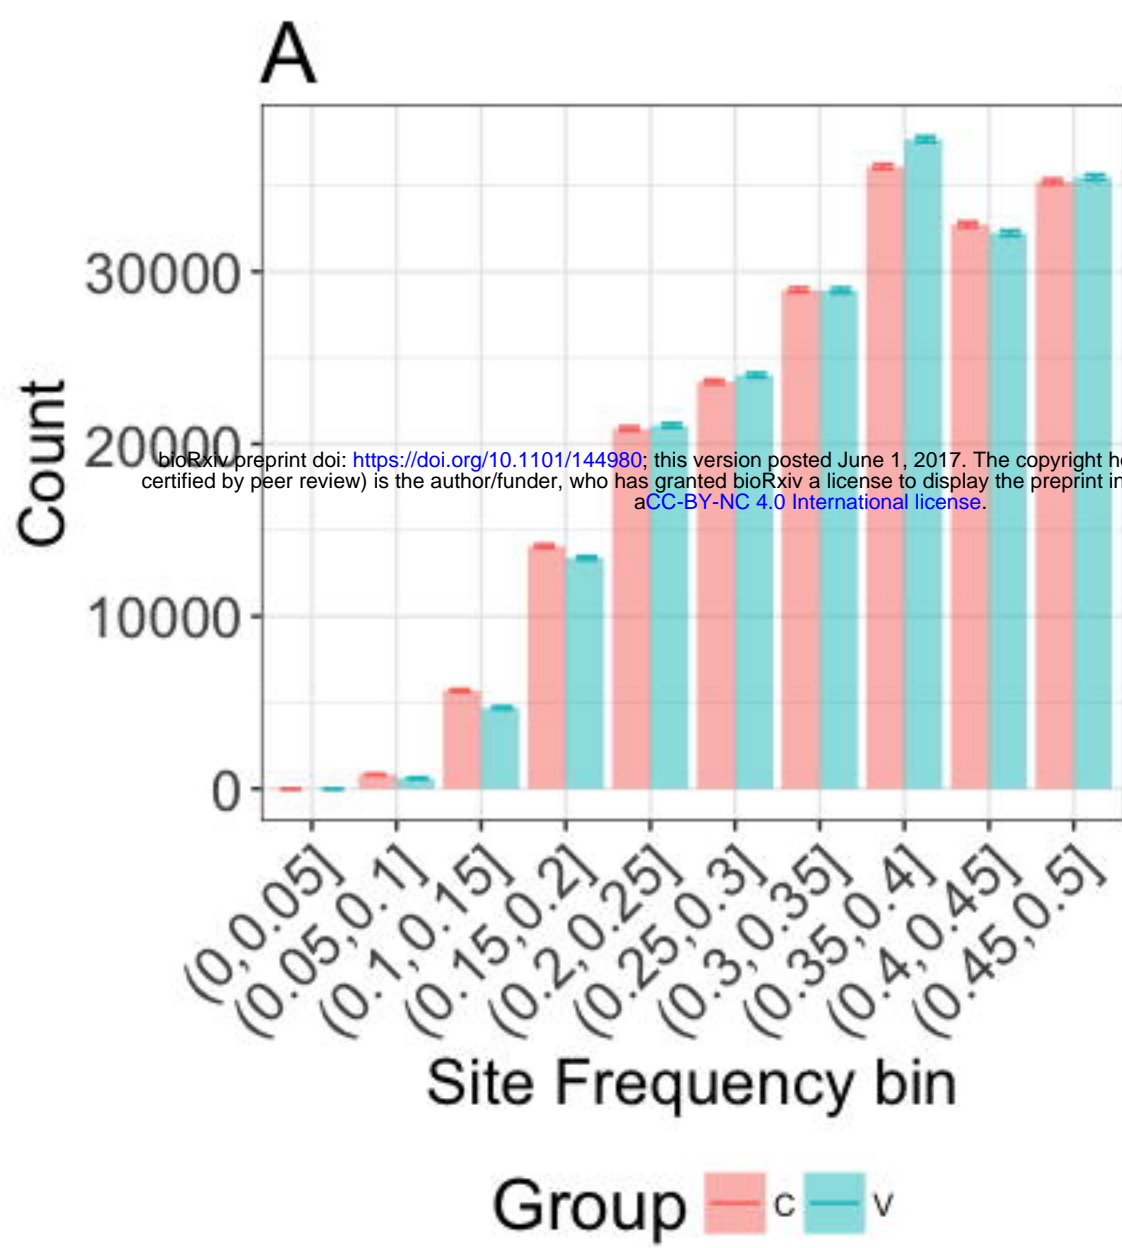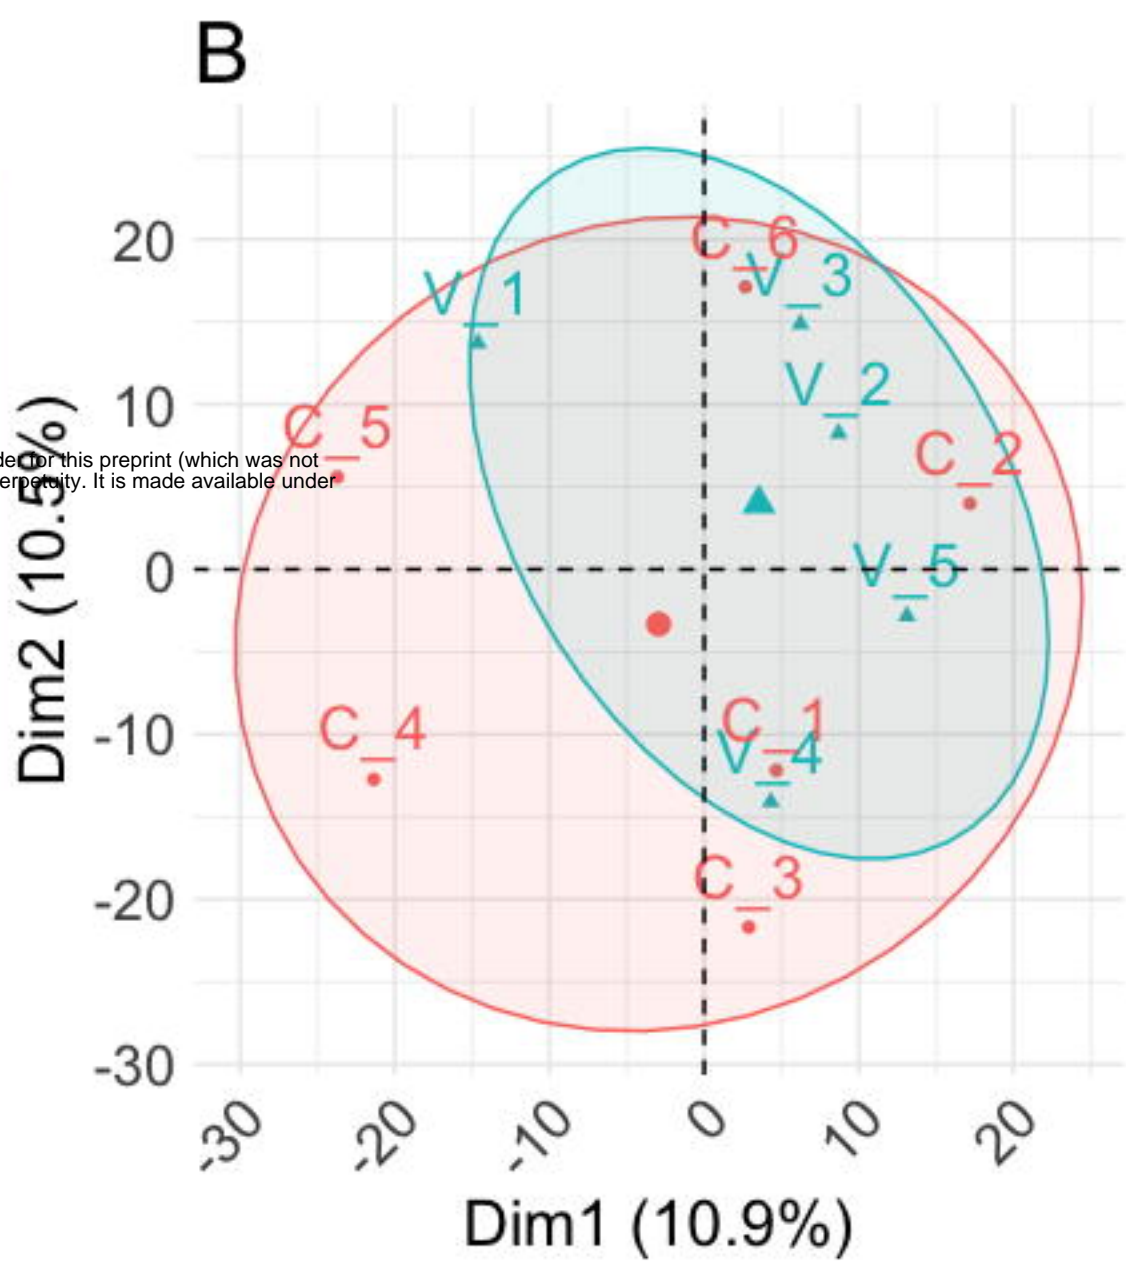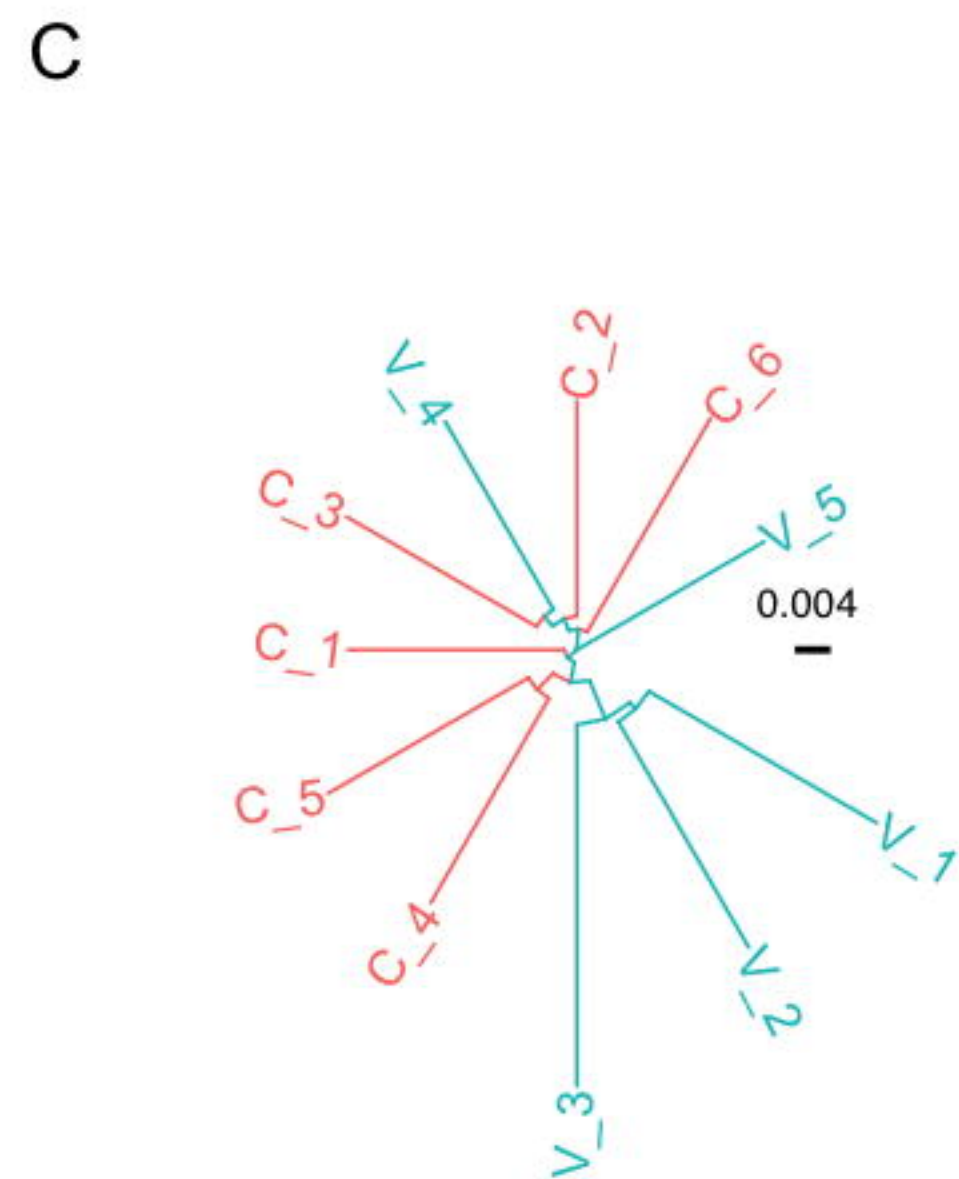

A

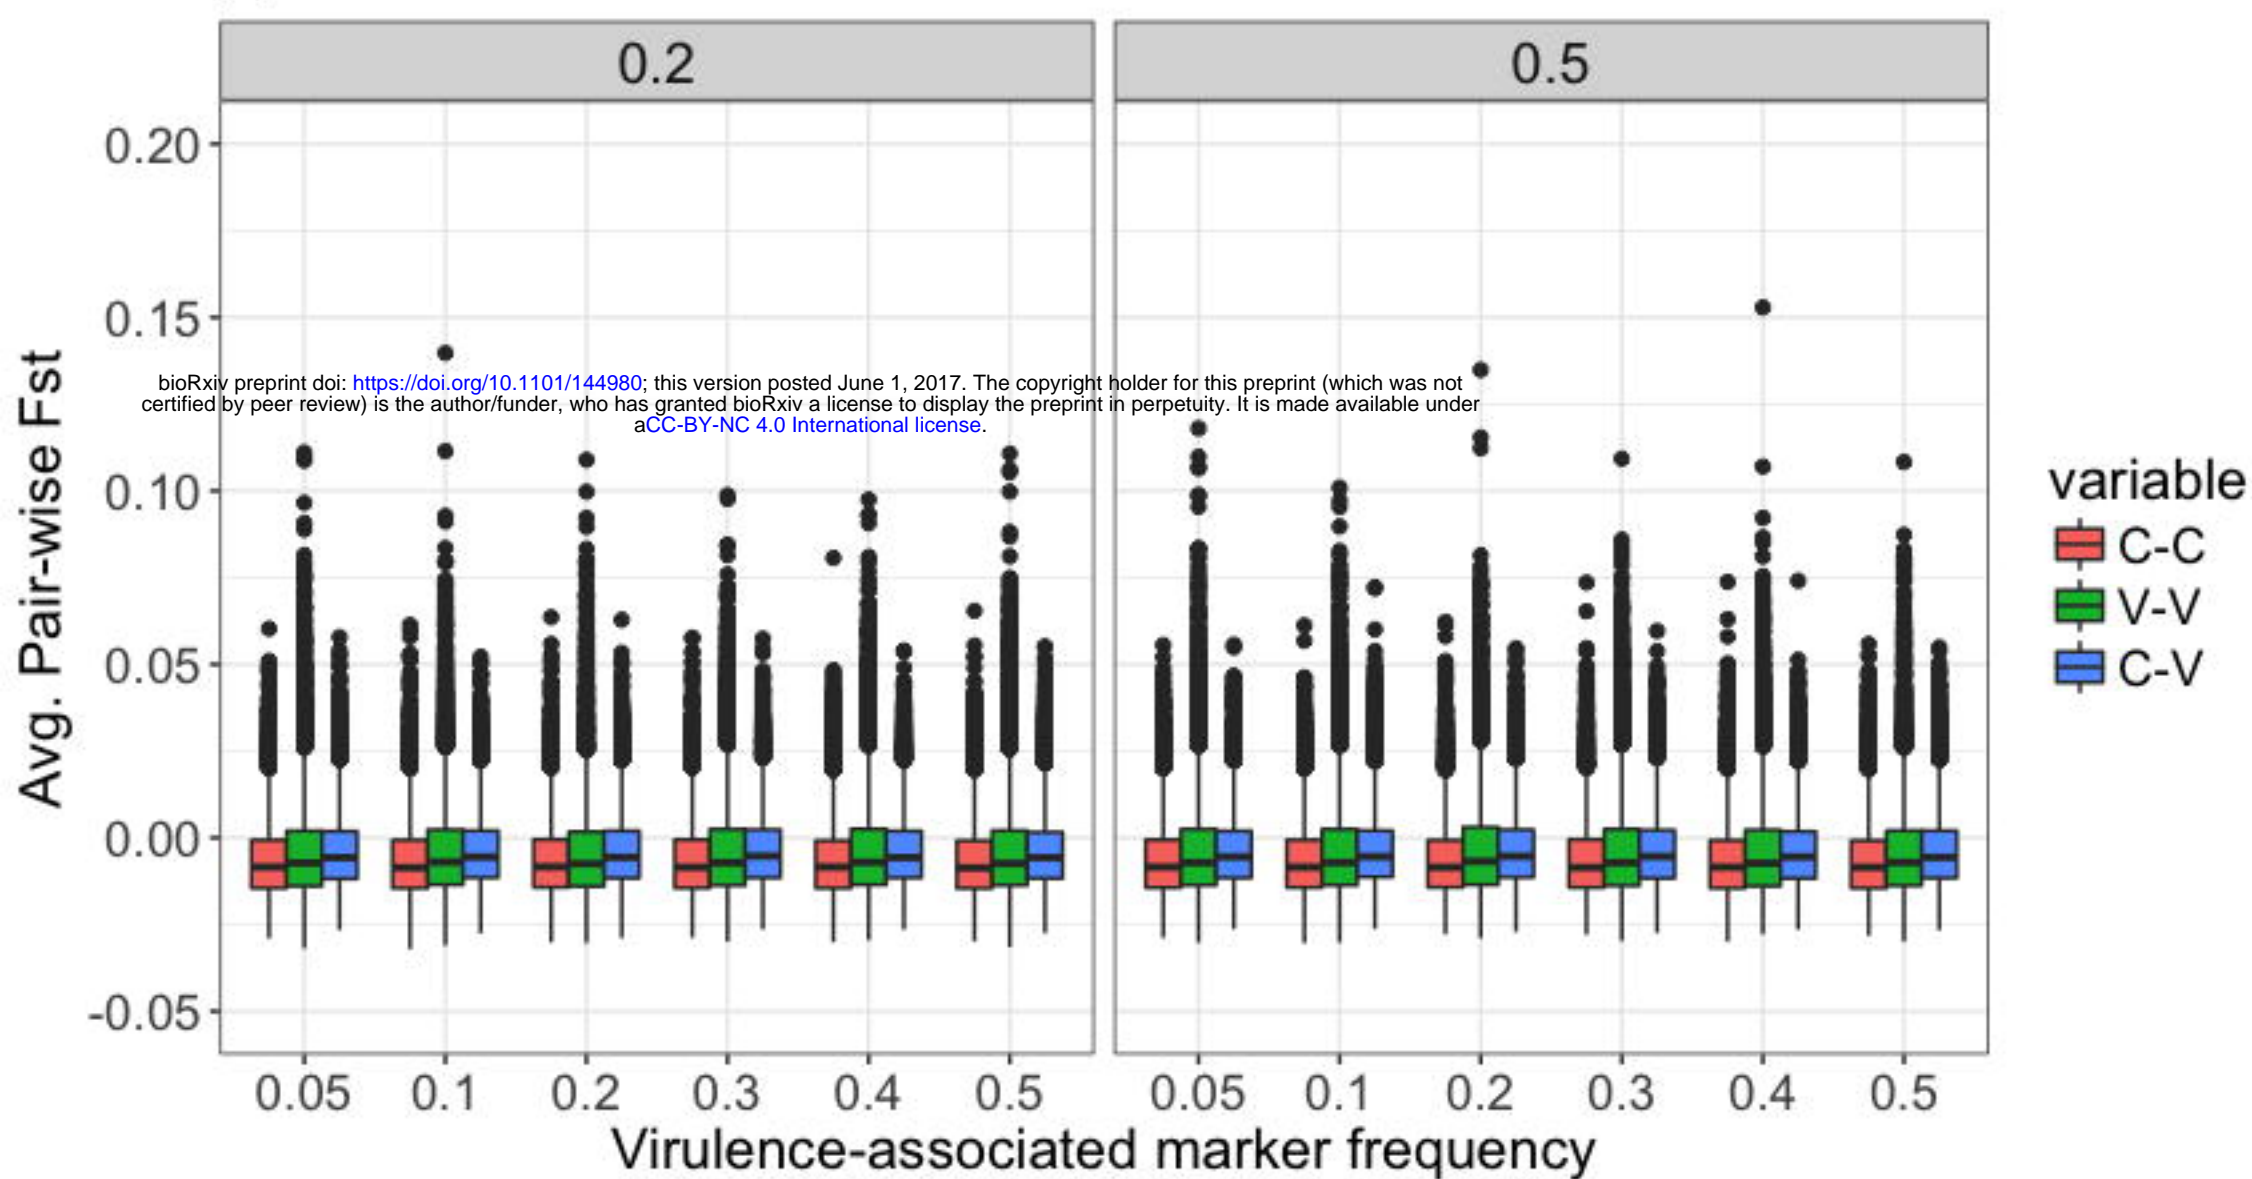

B

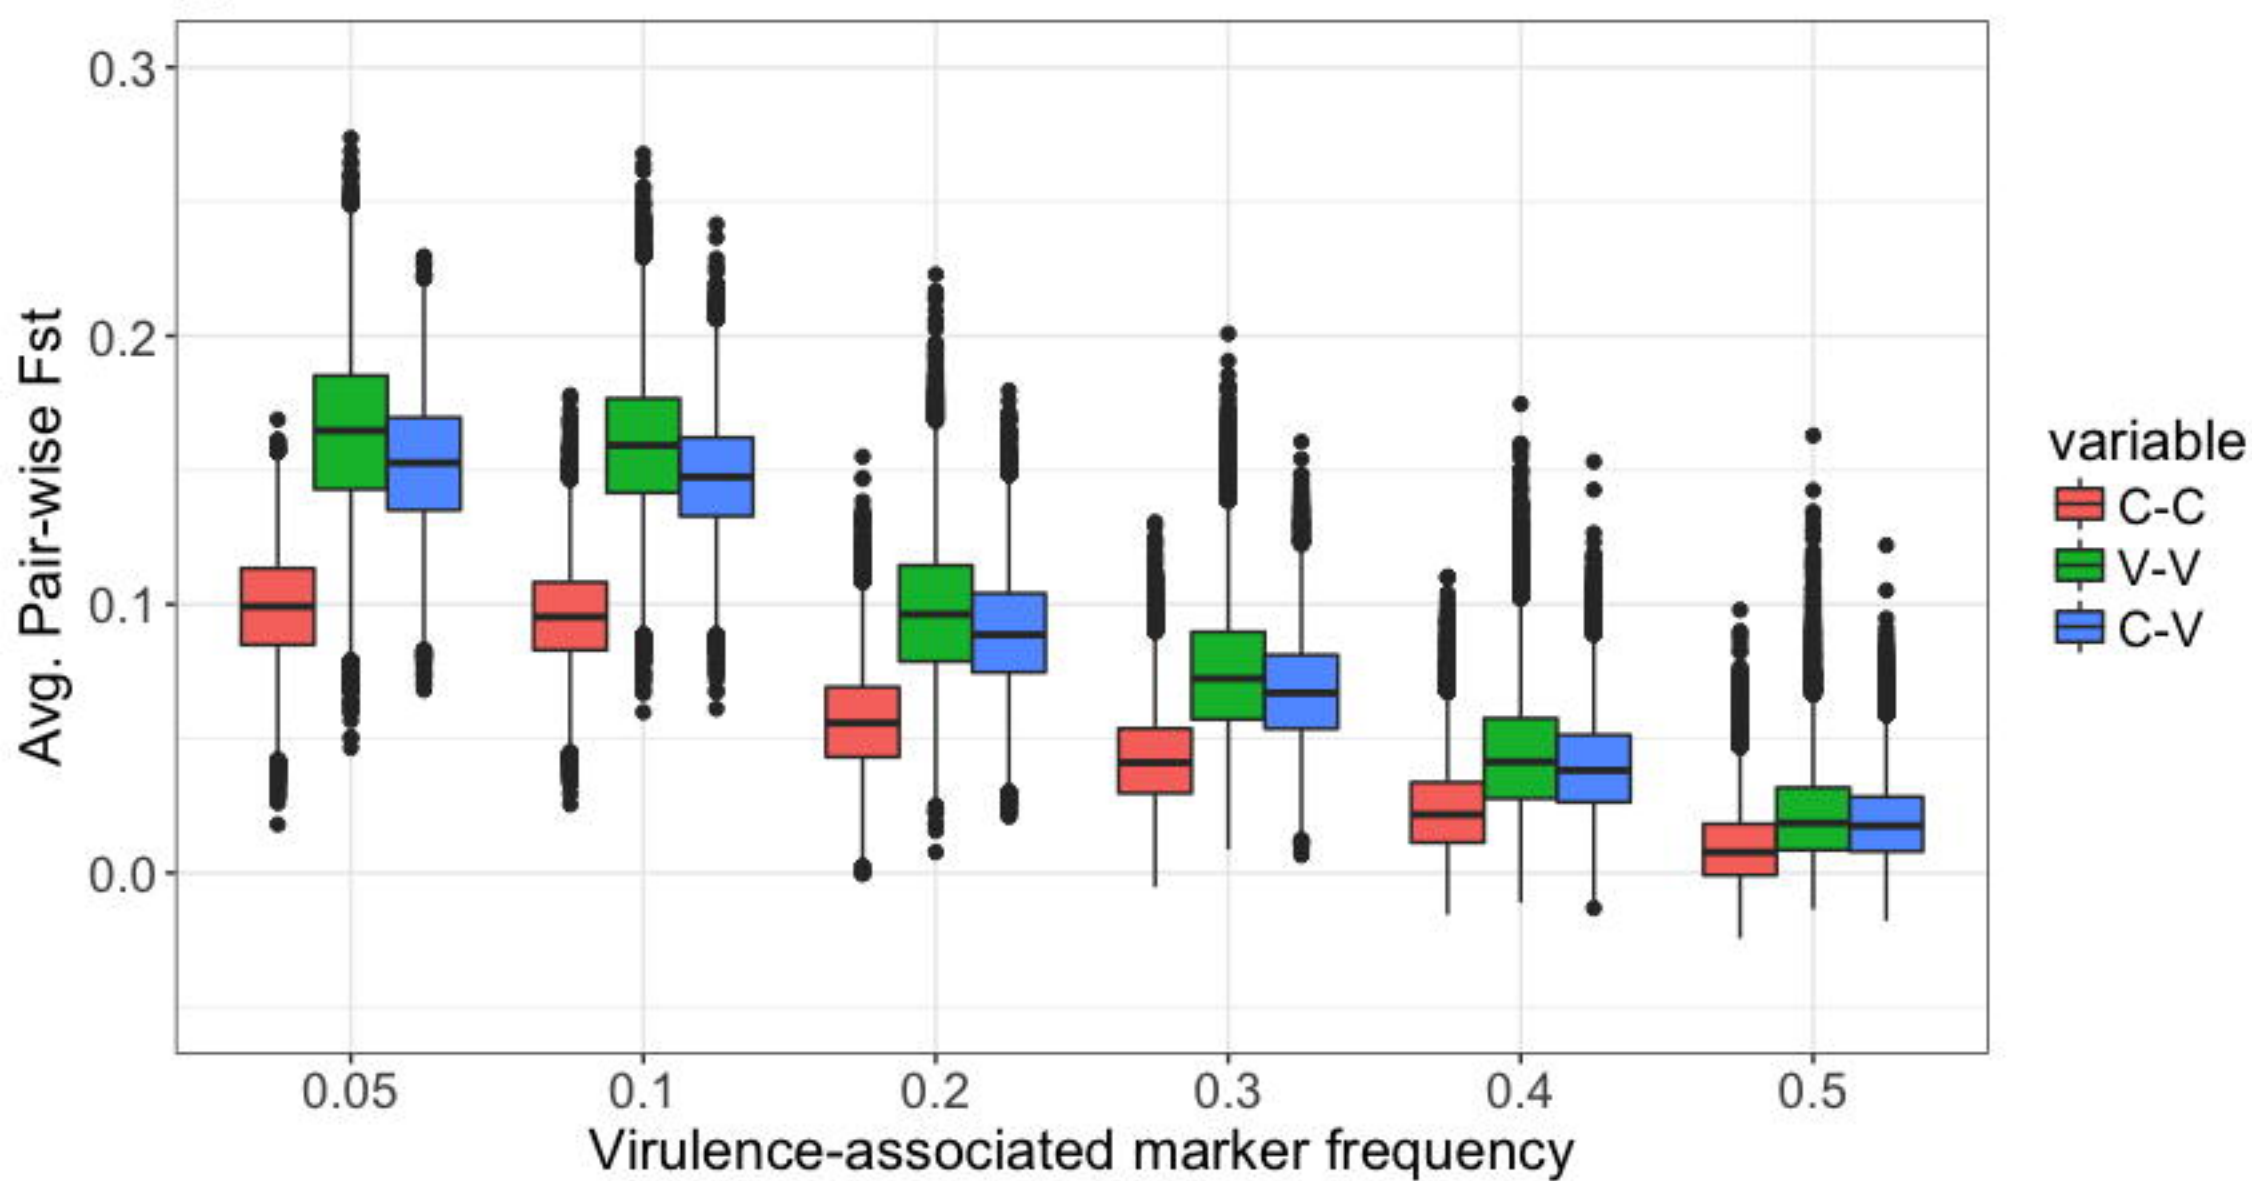



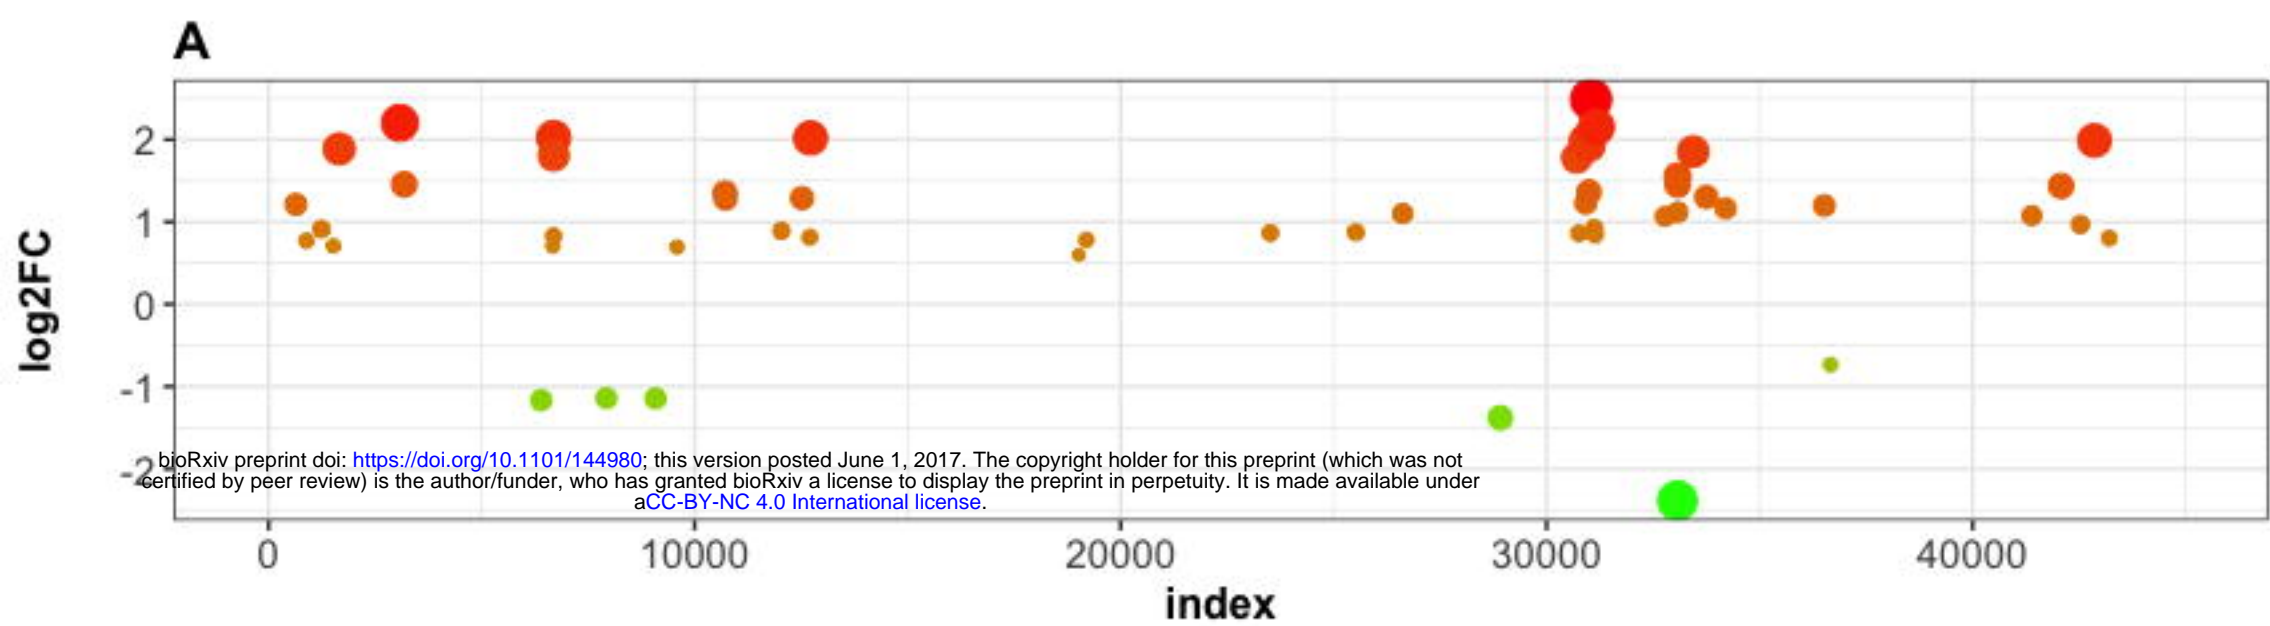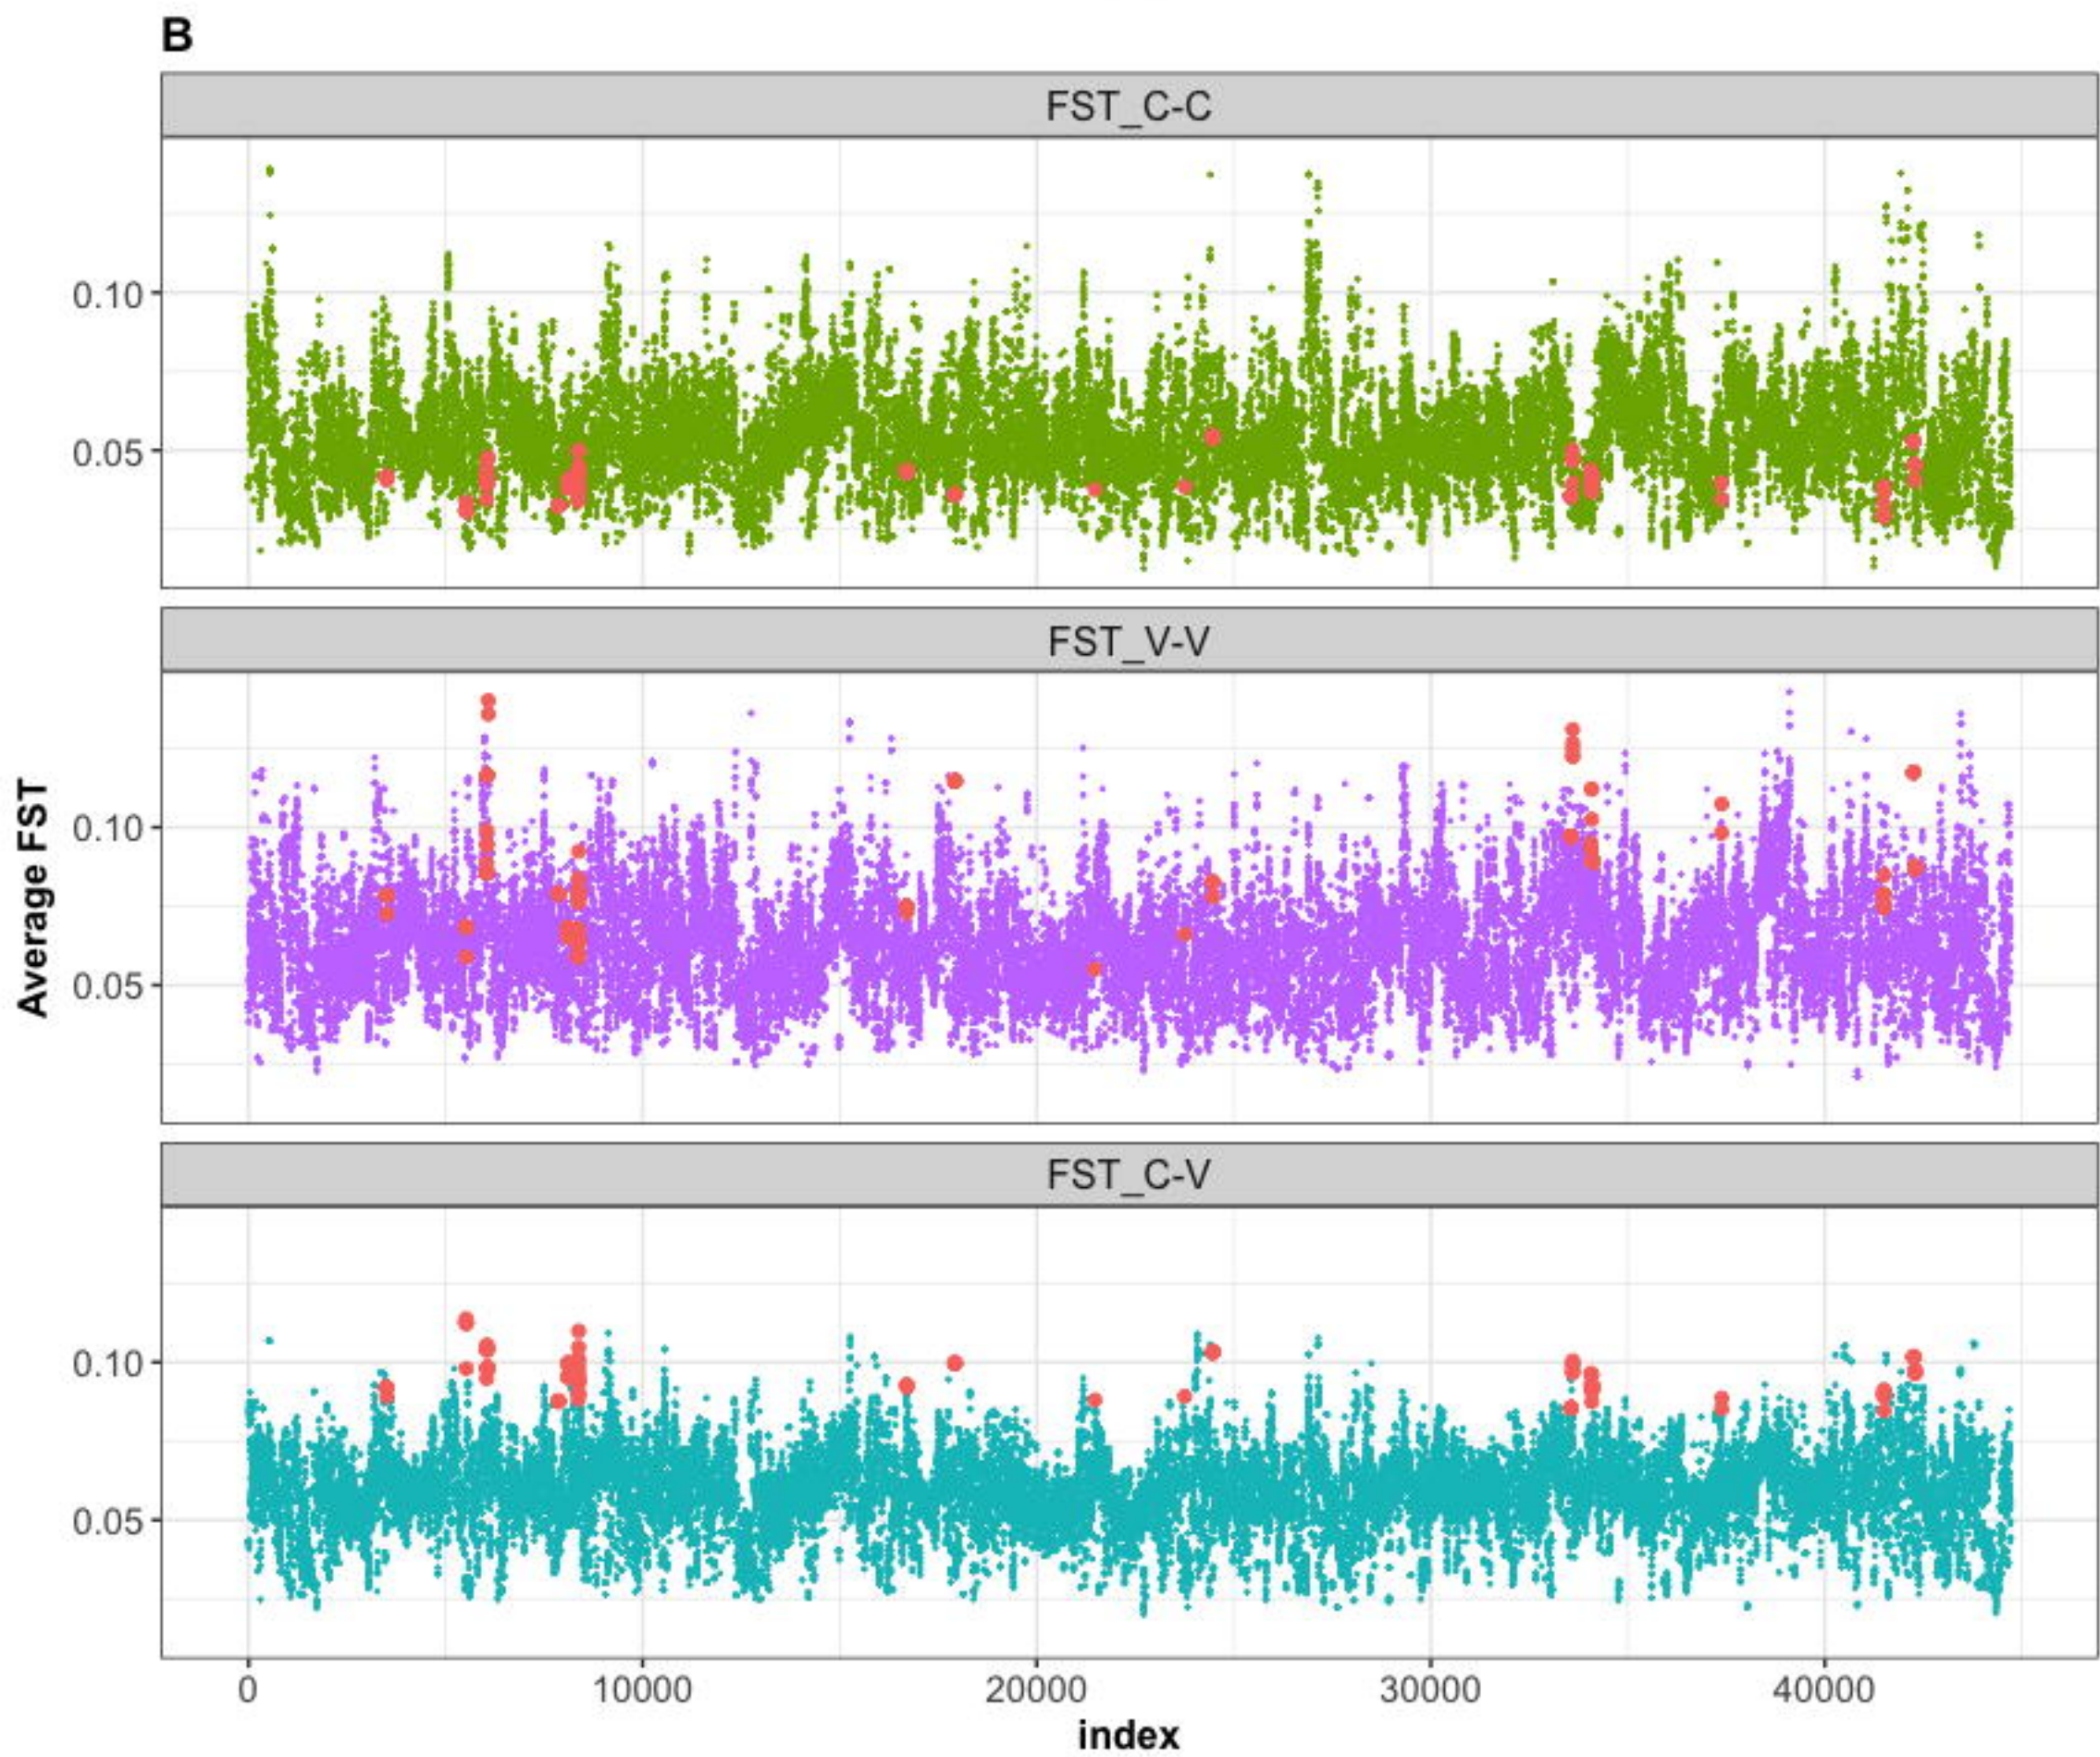



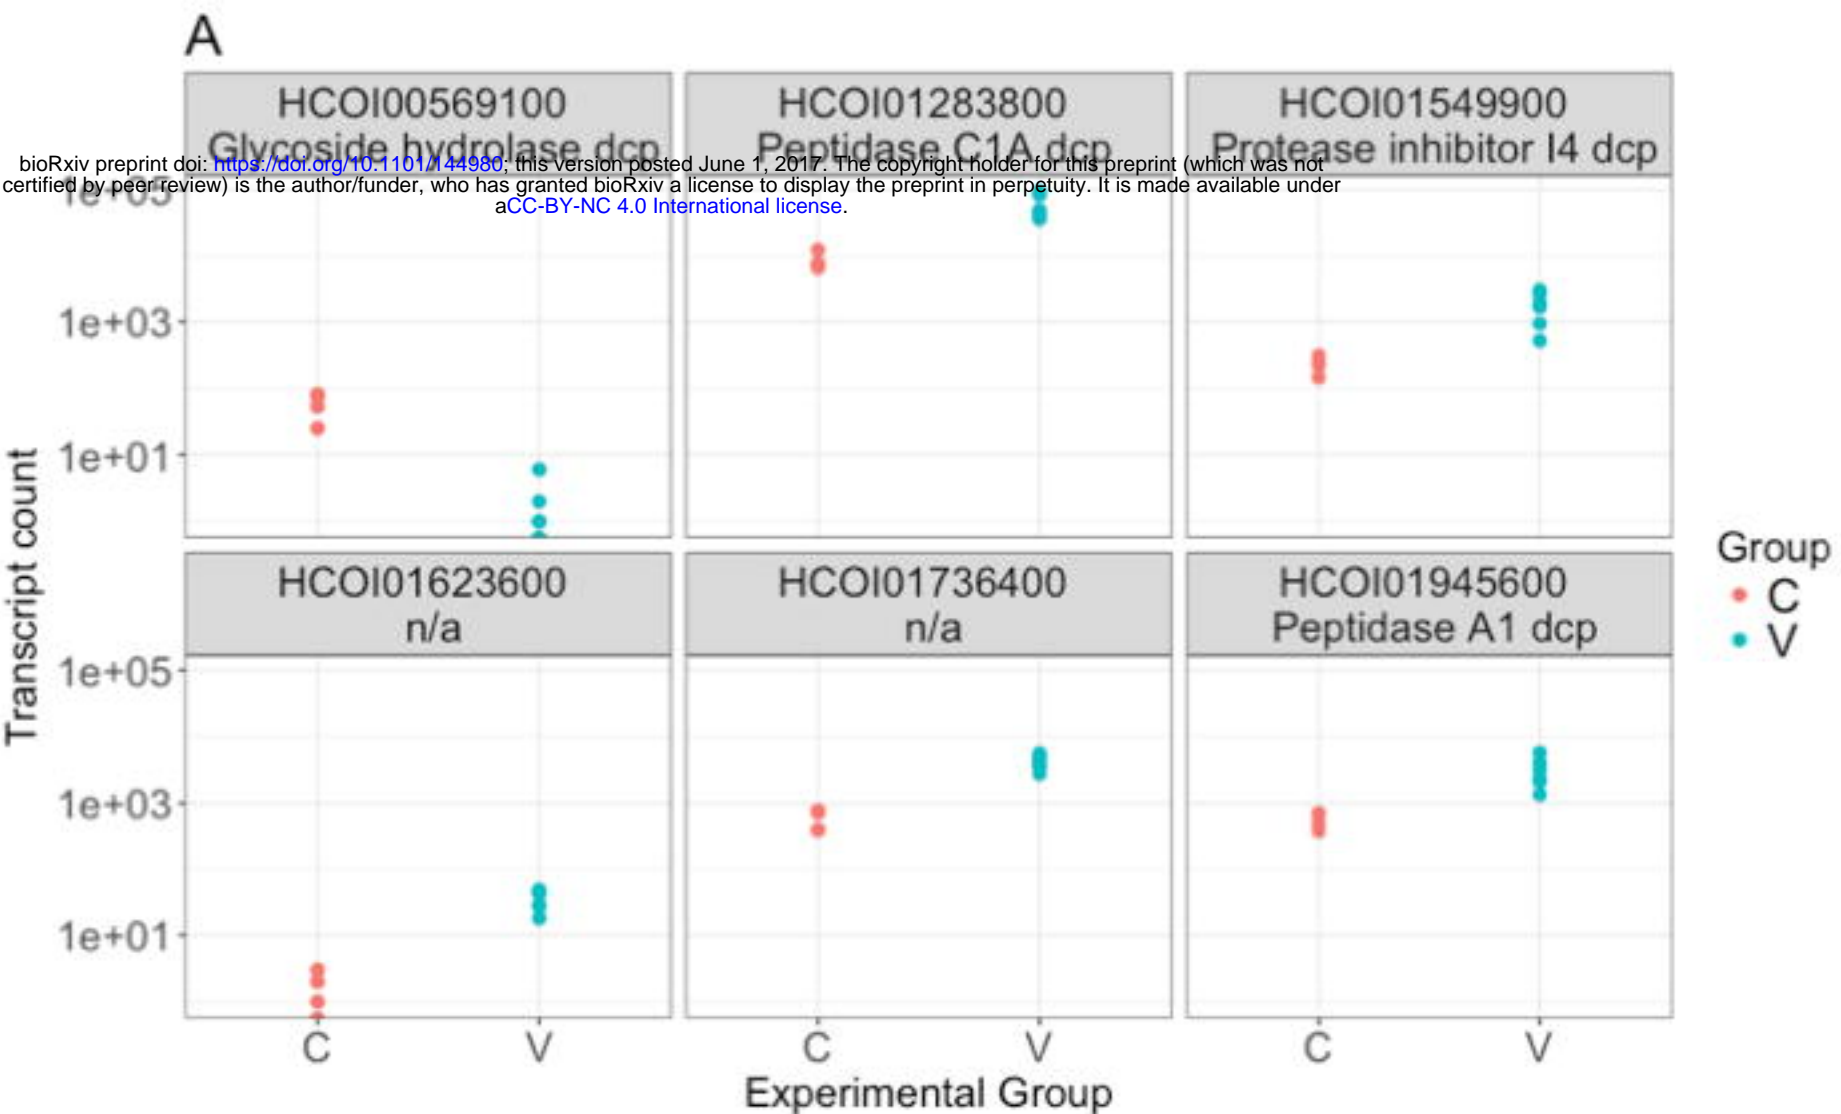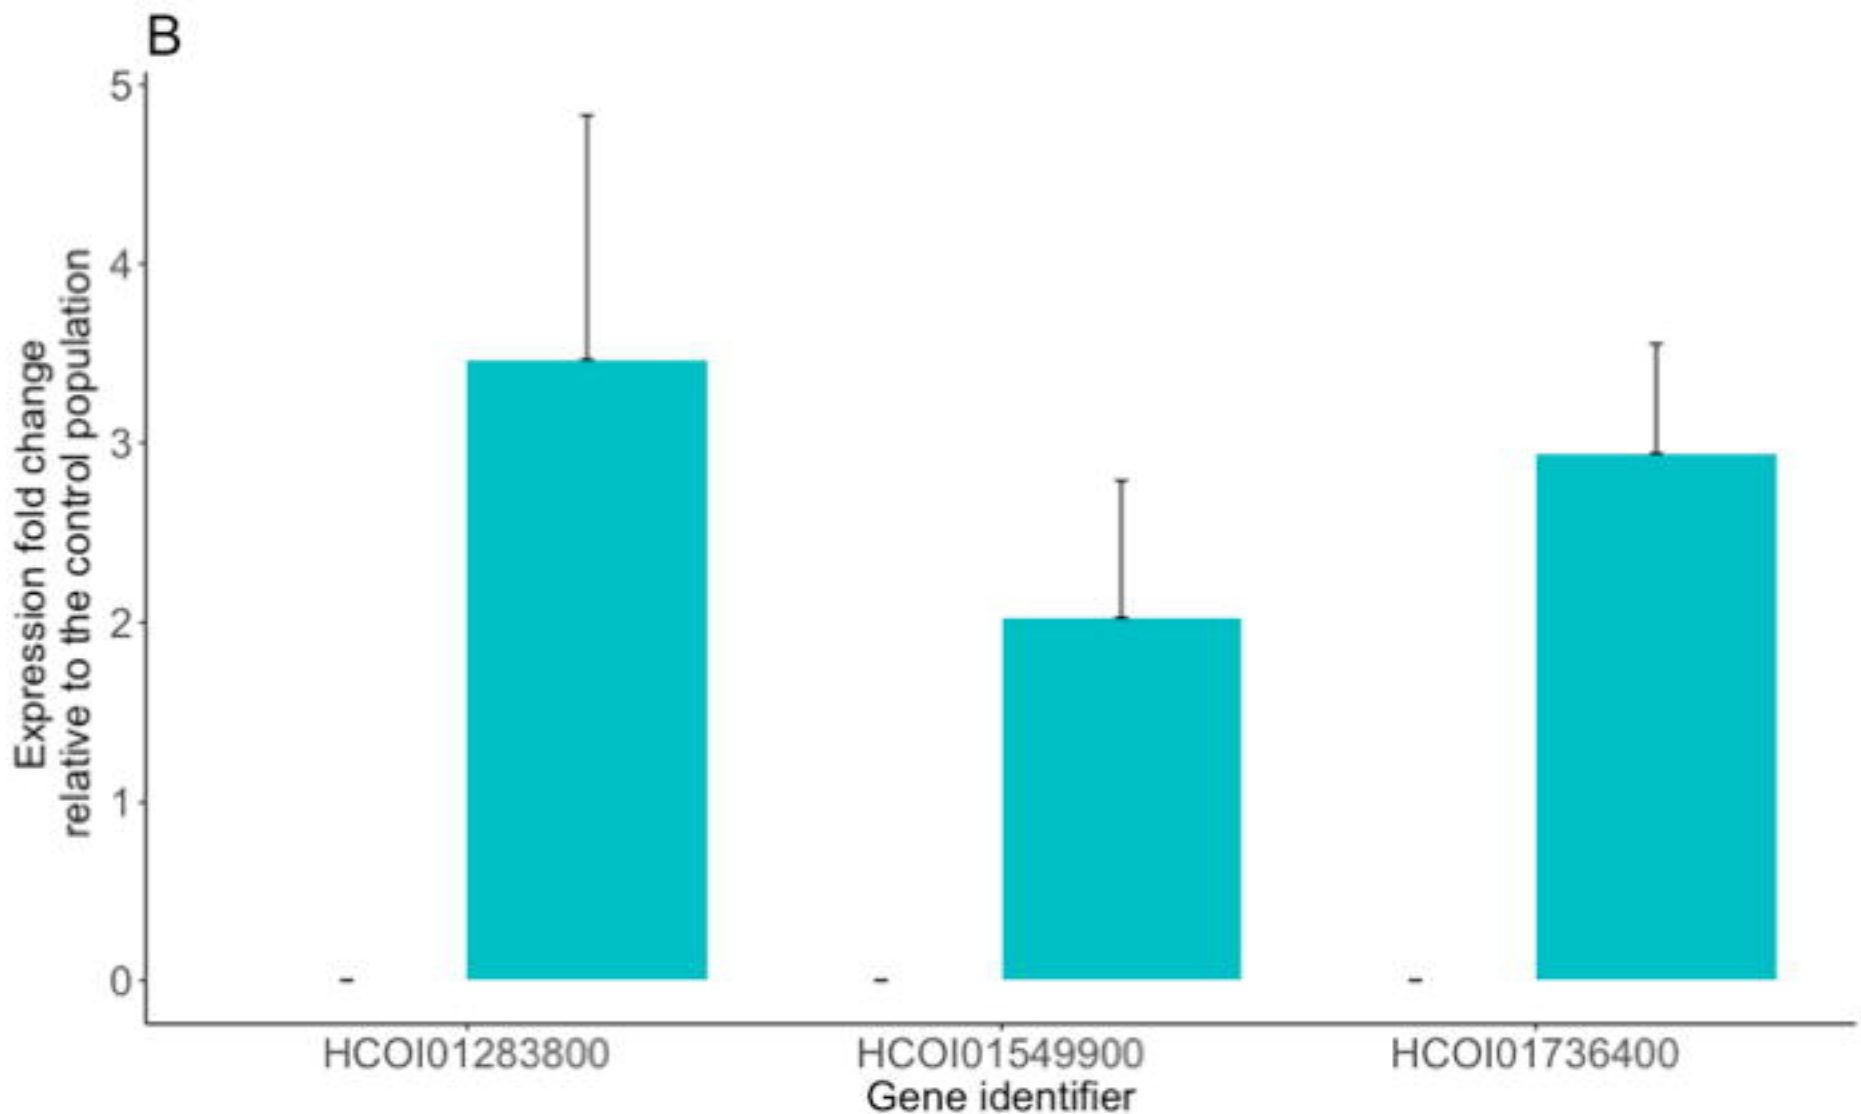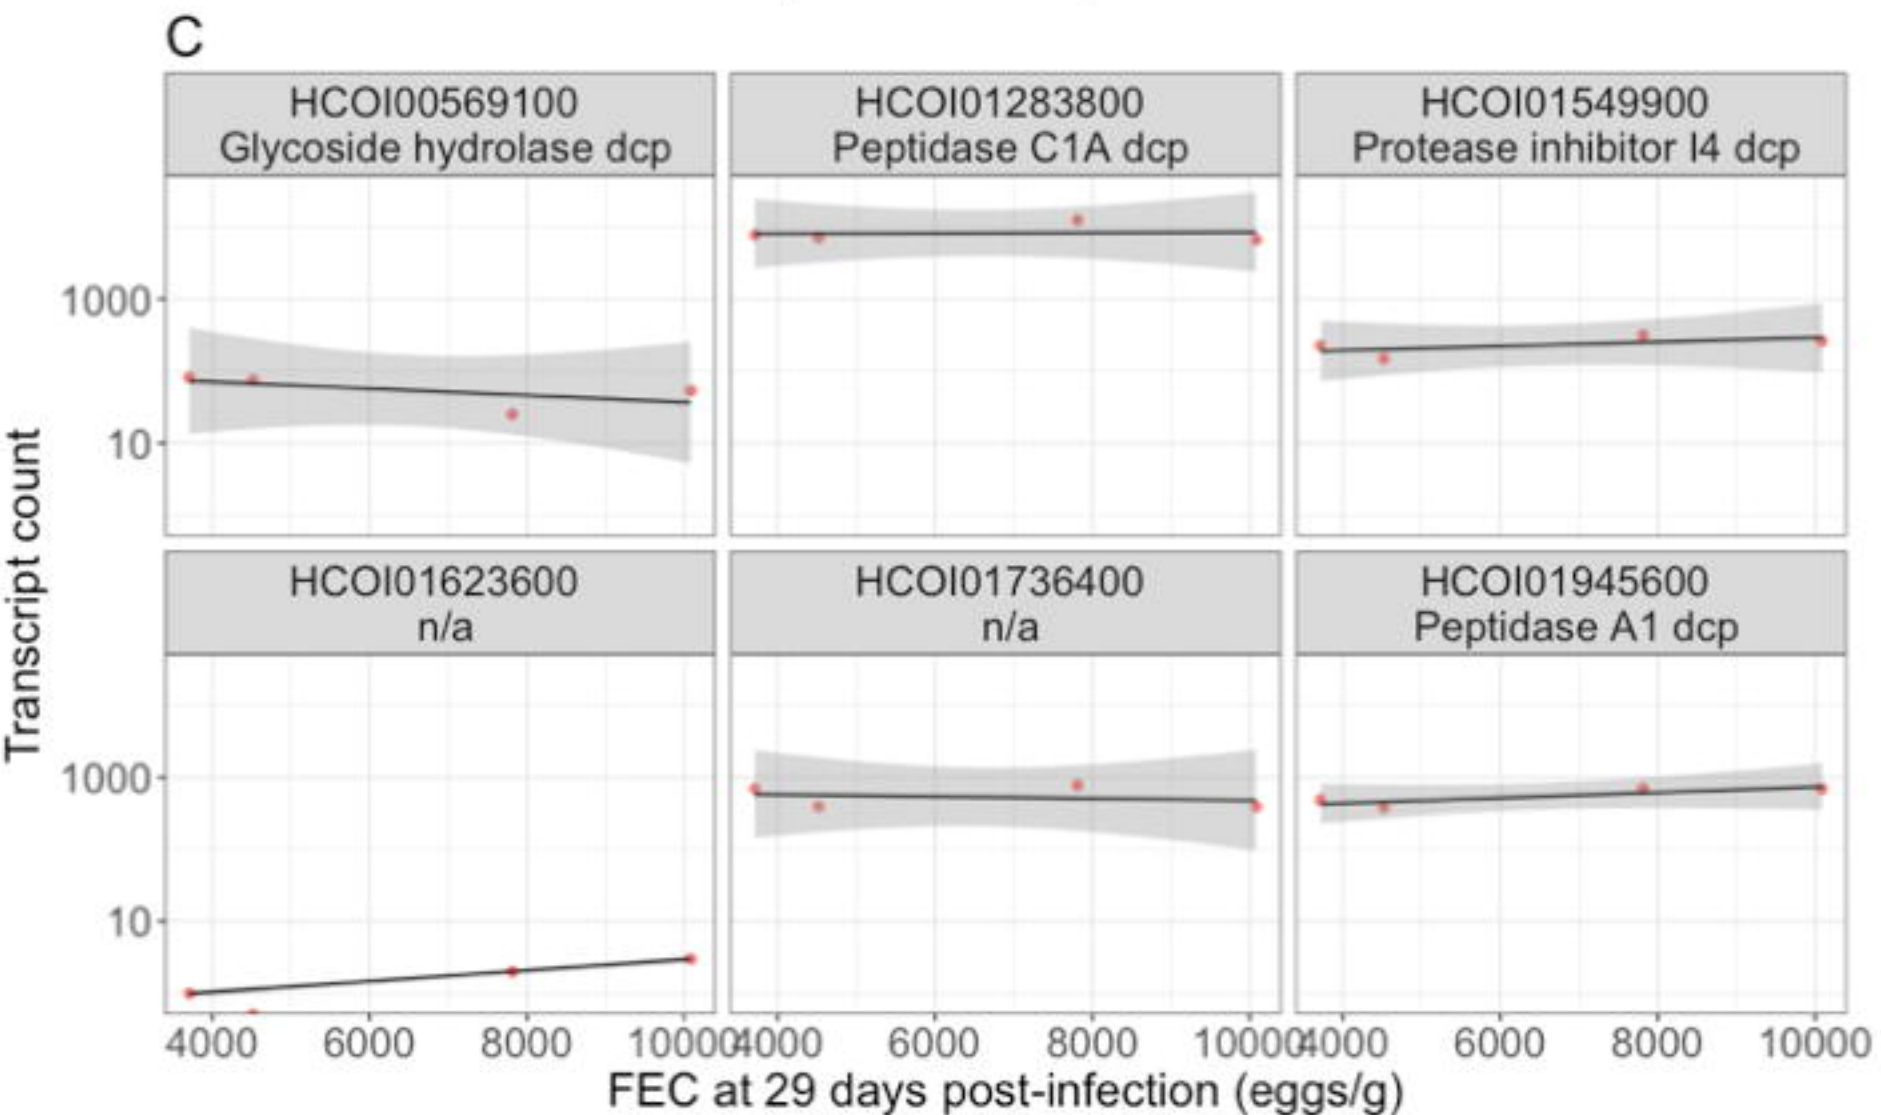

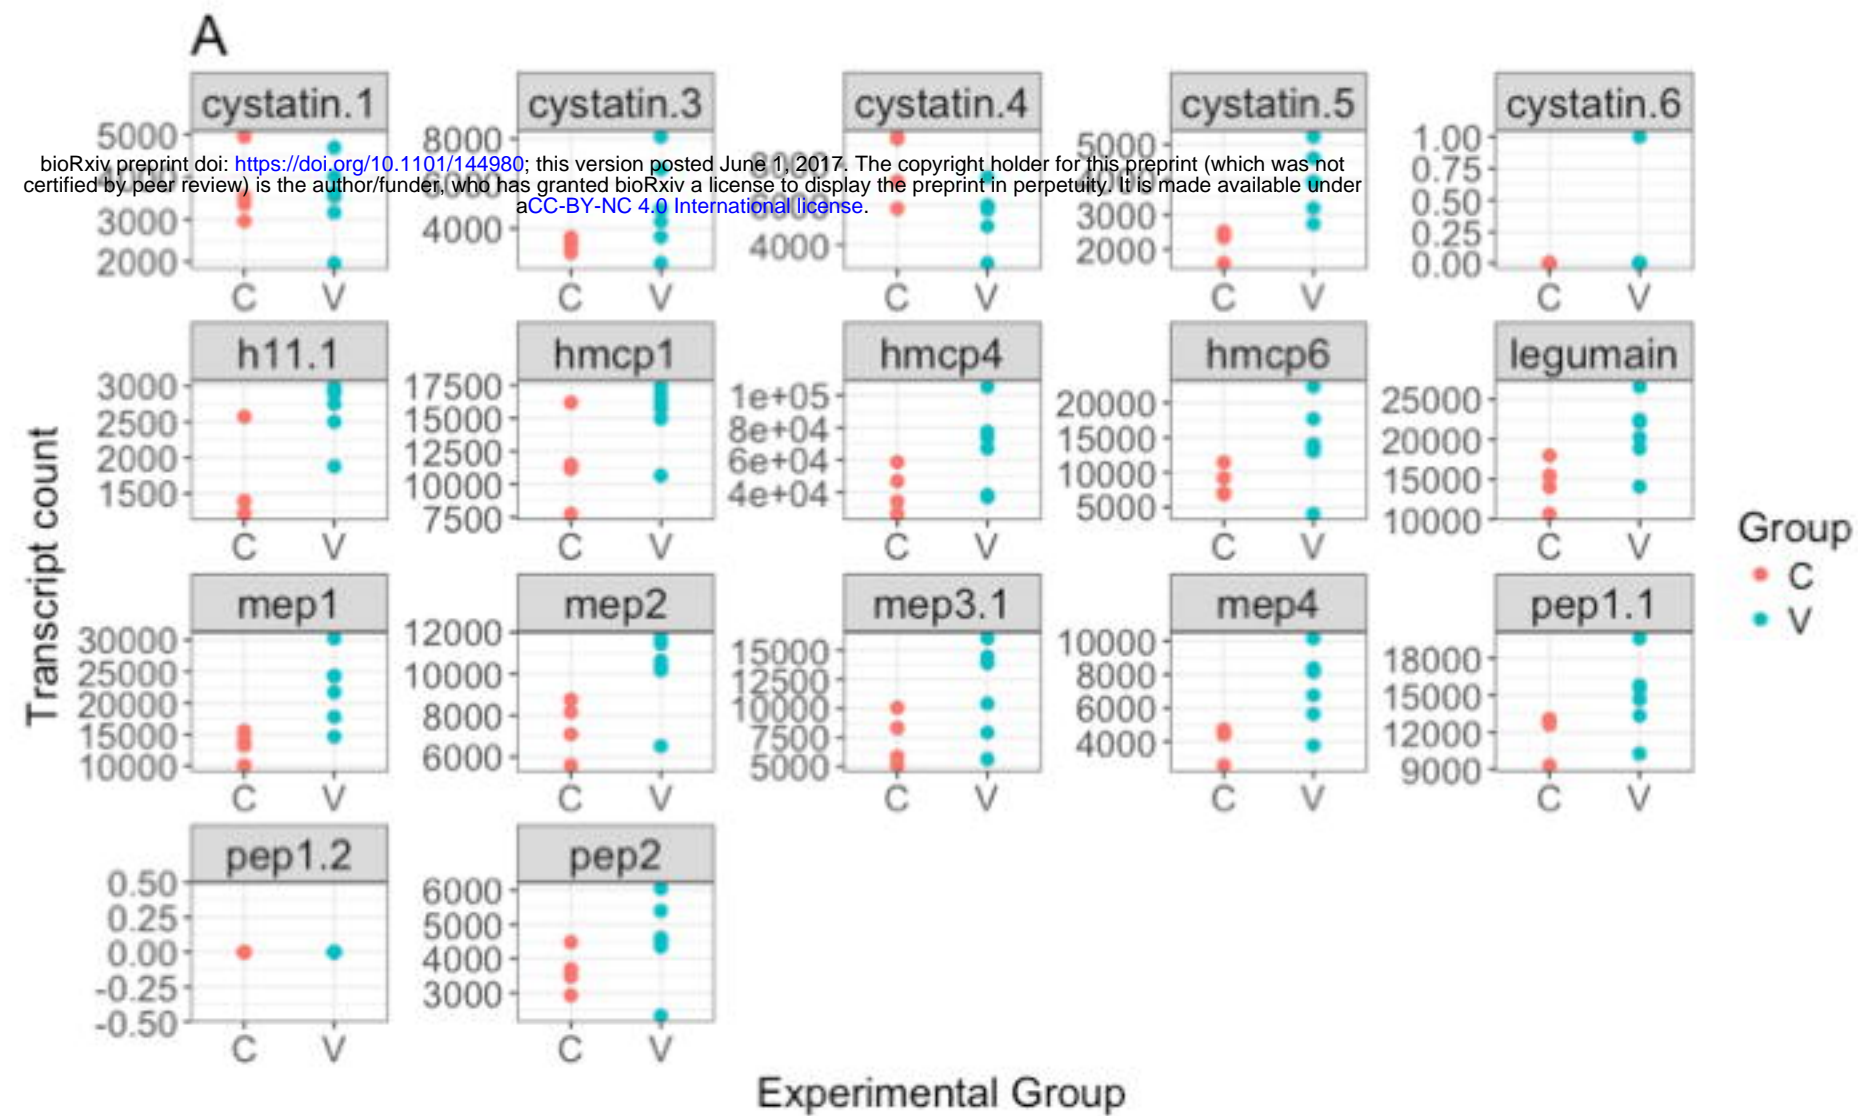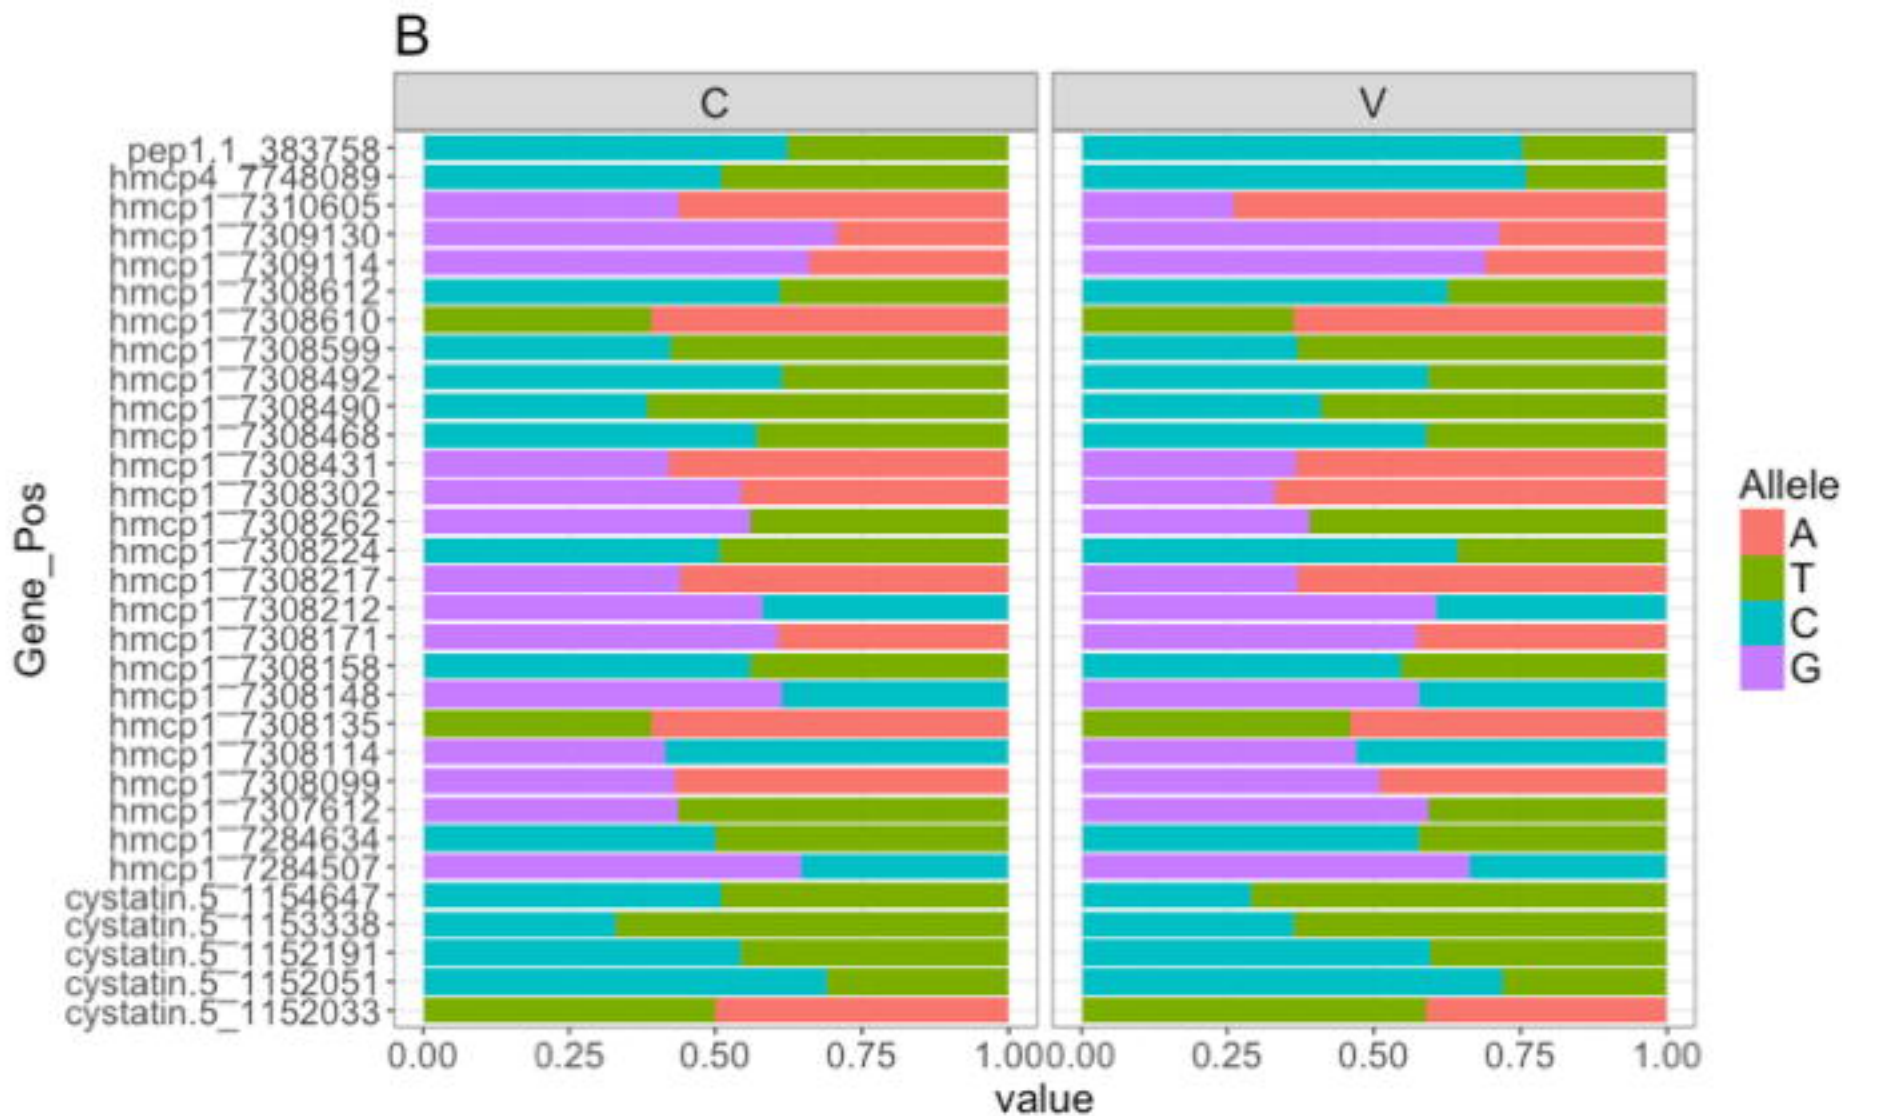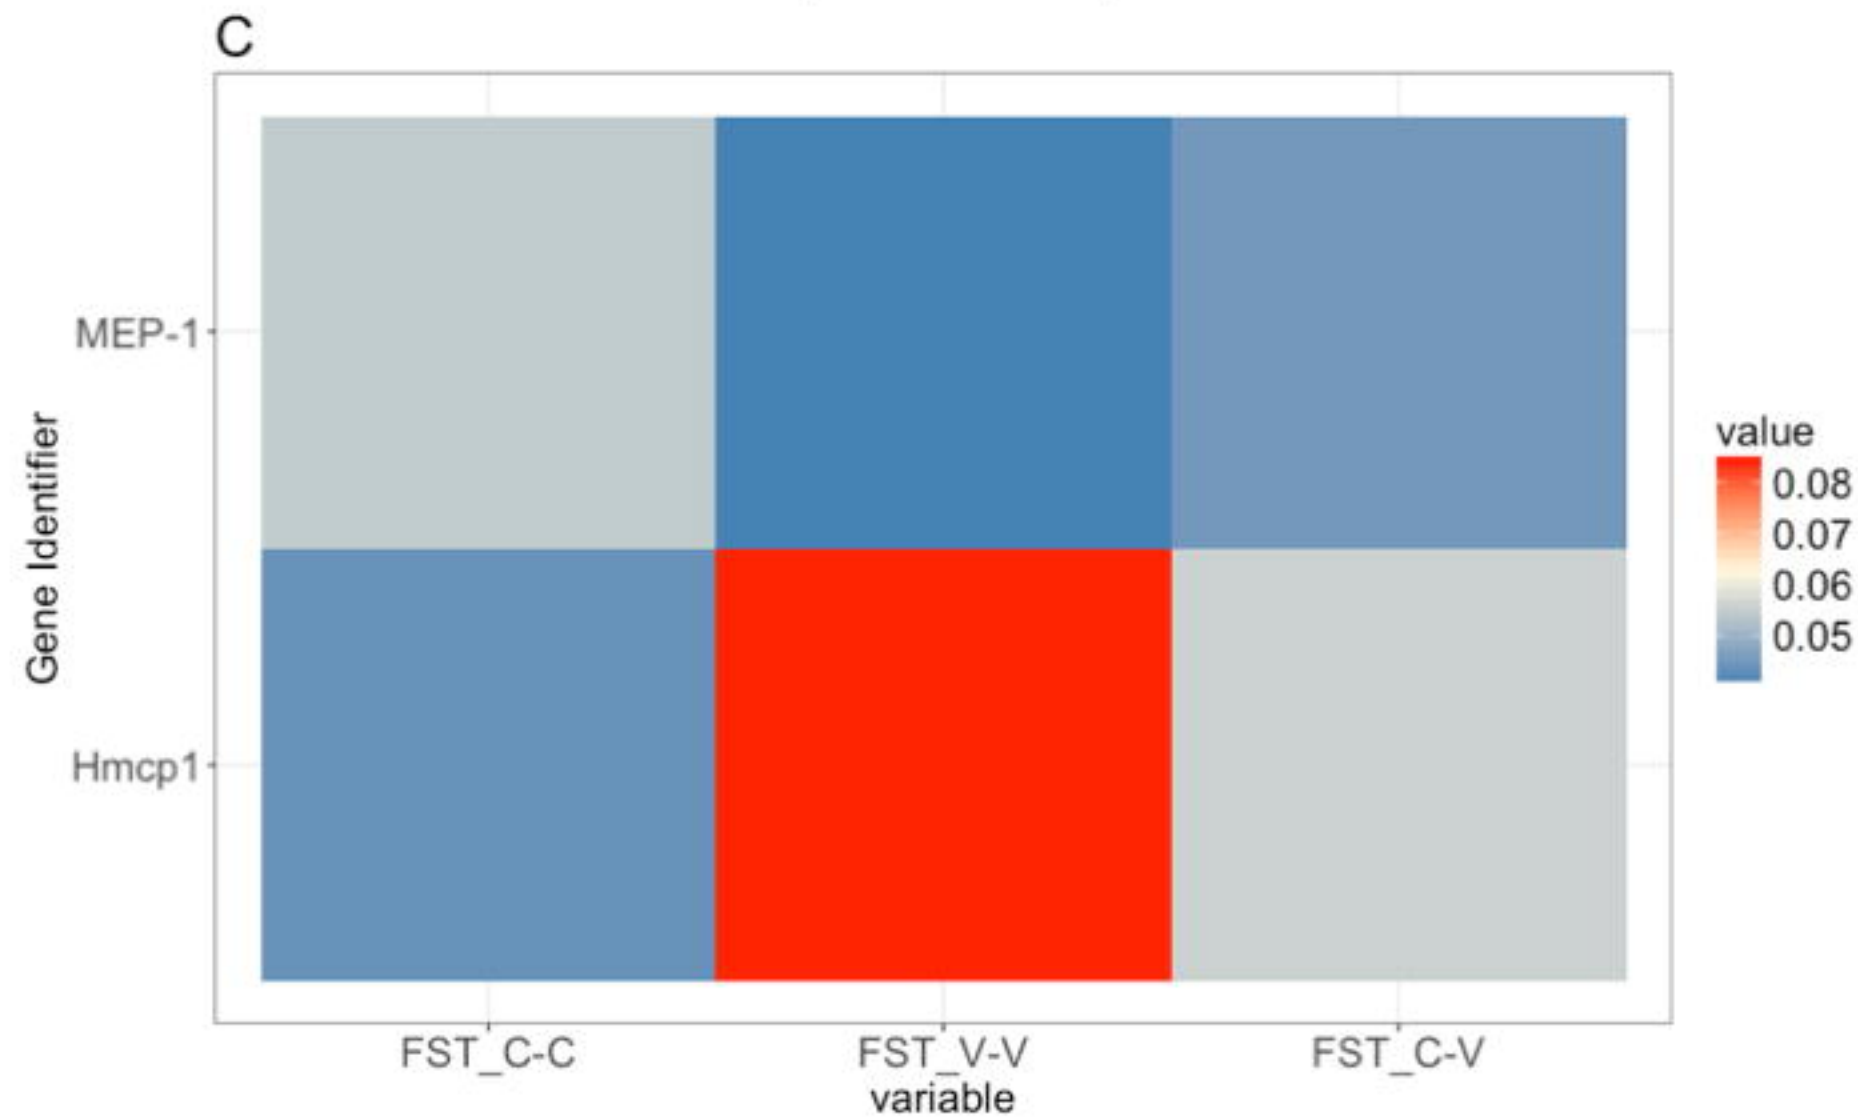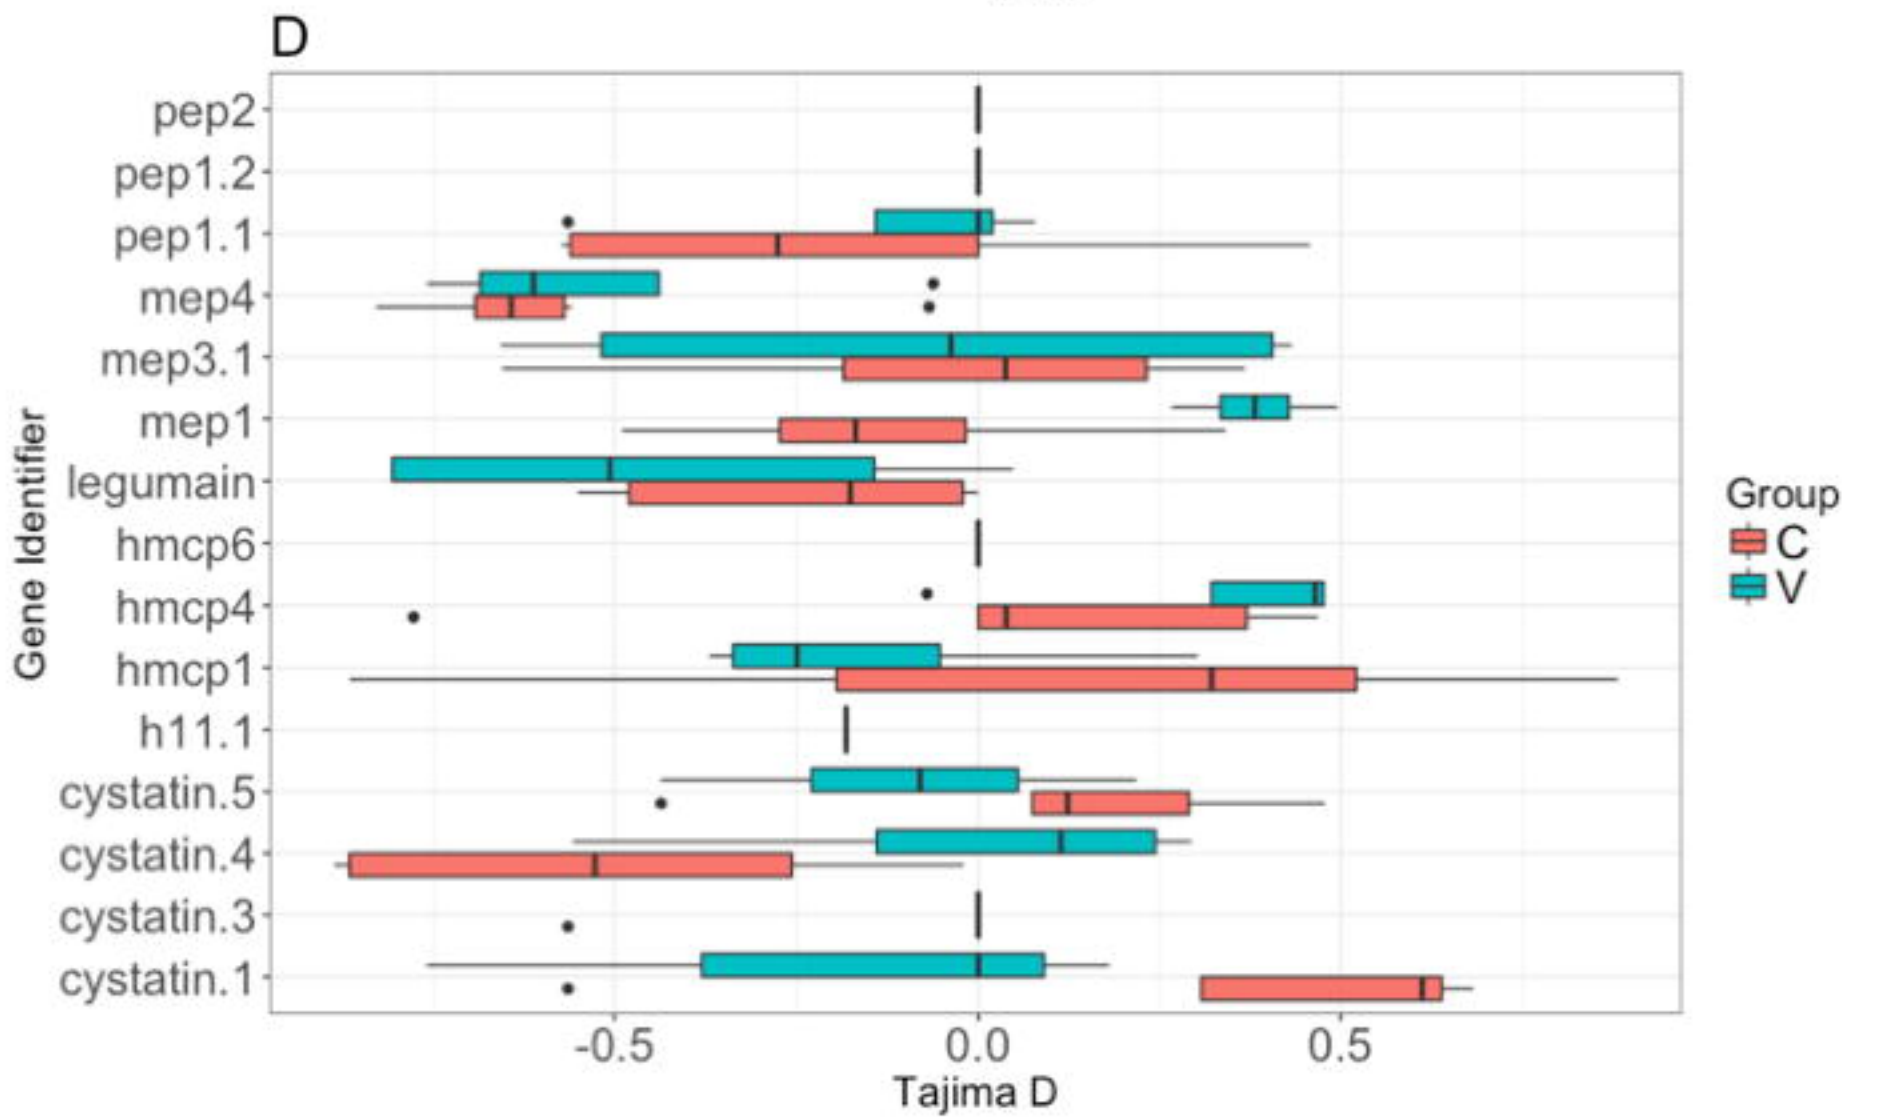

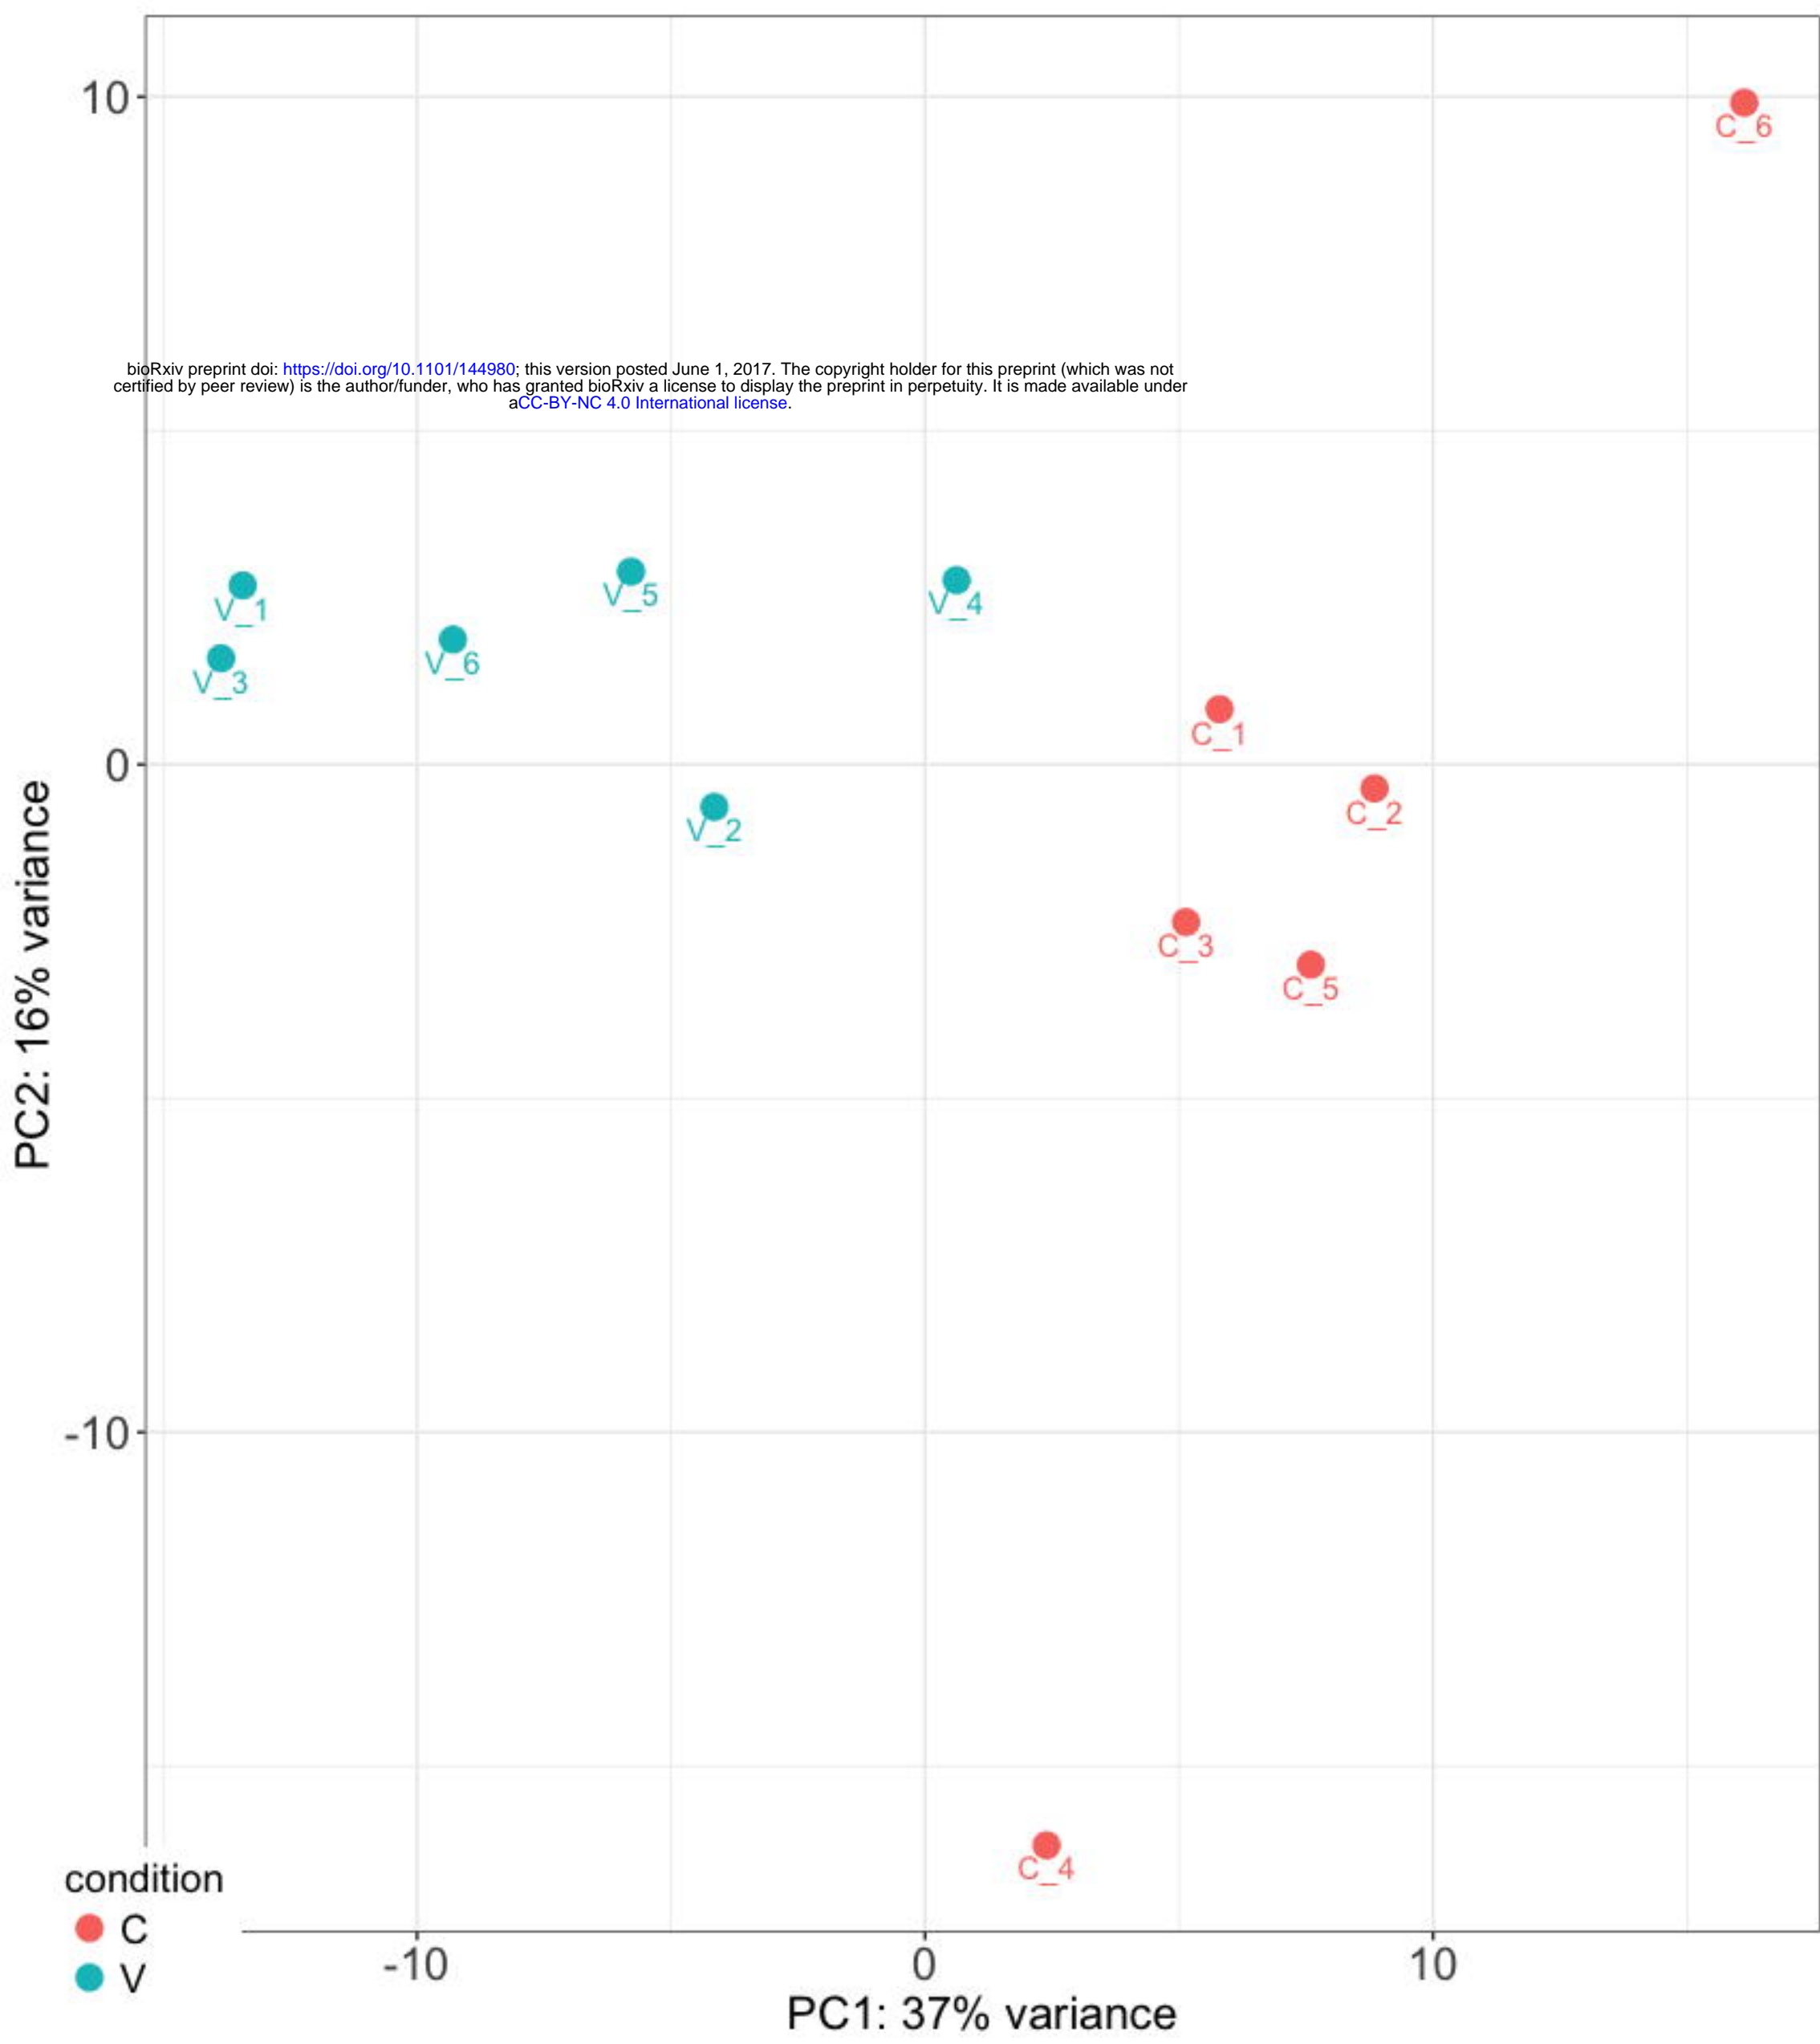



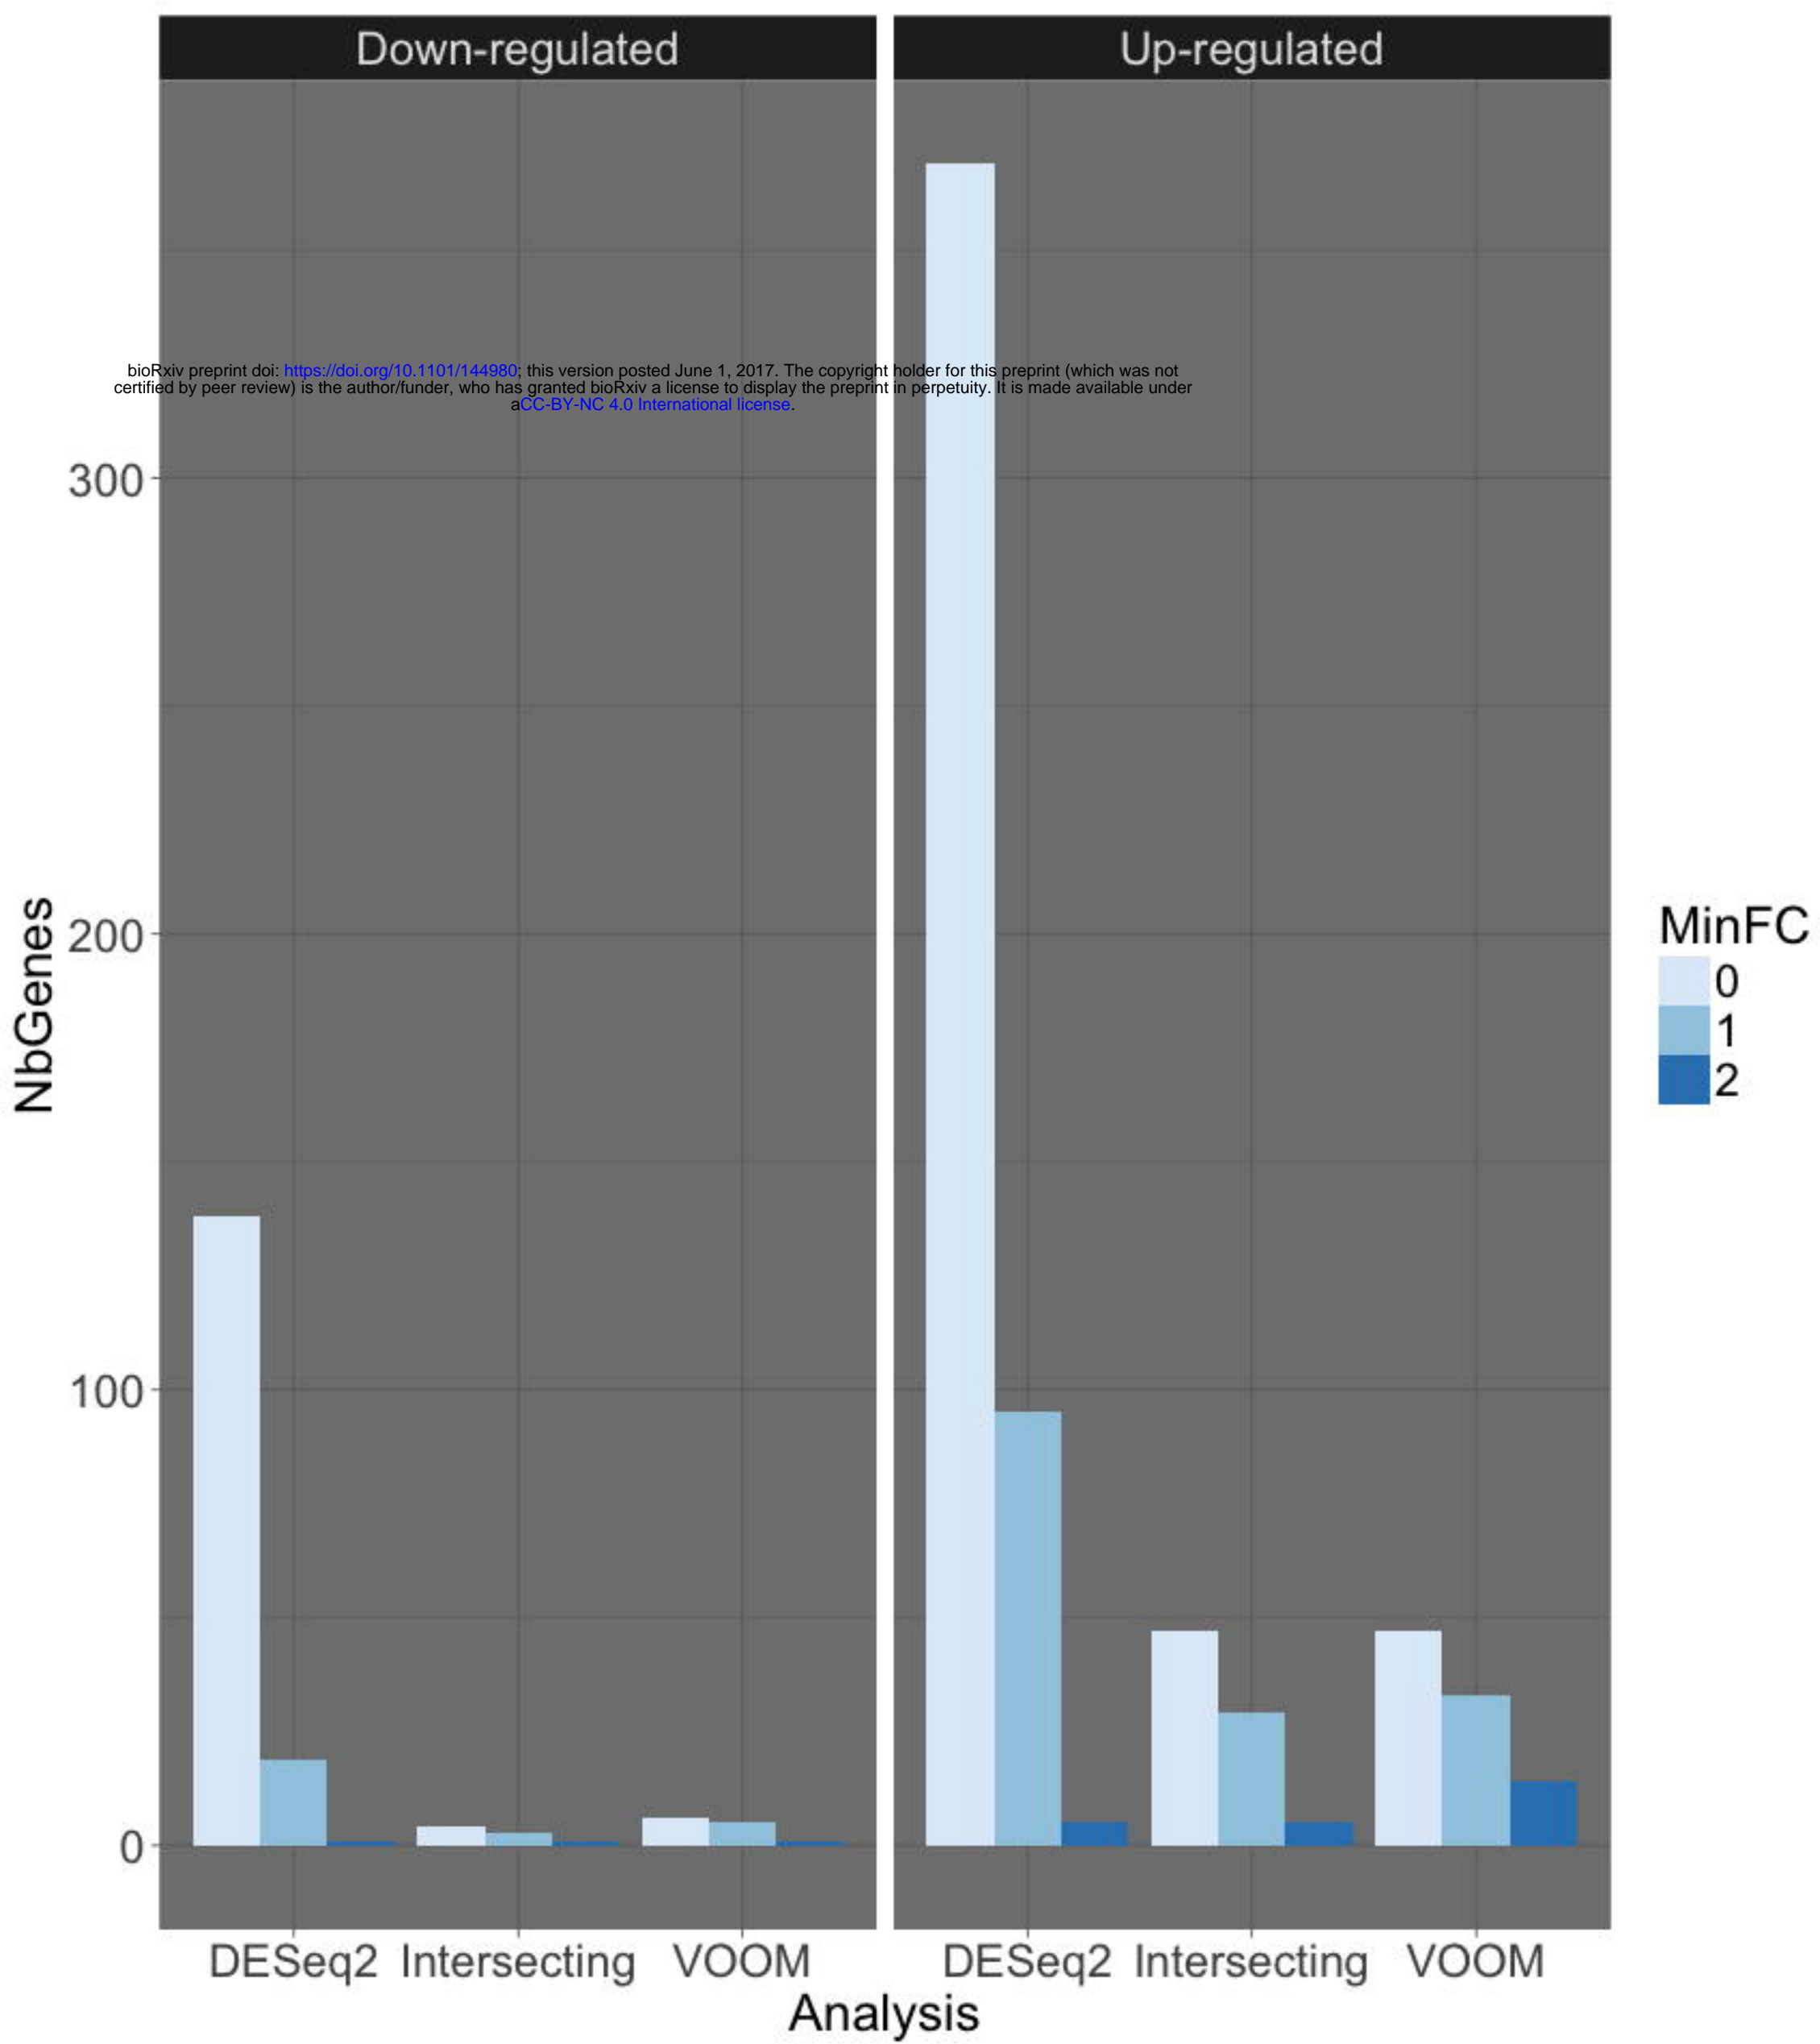

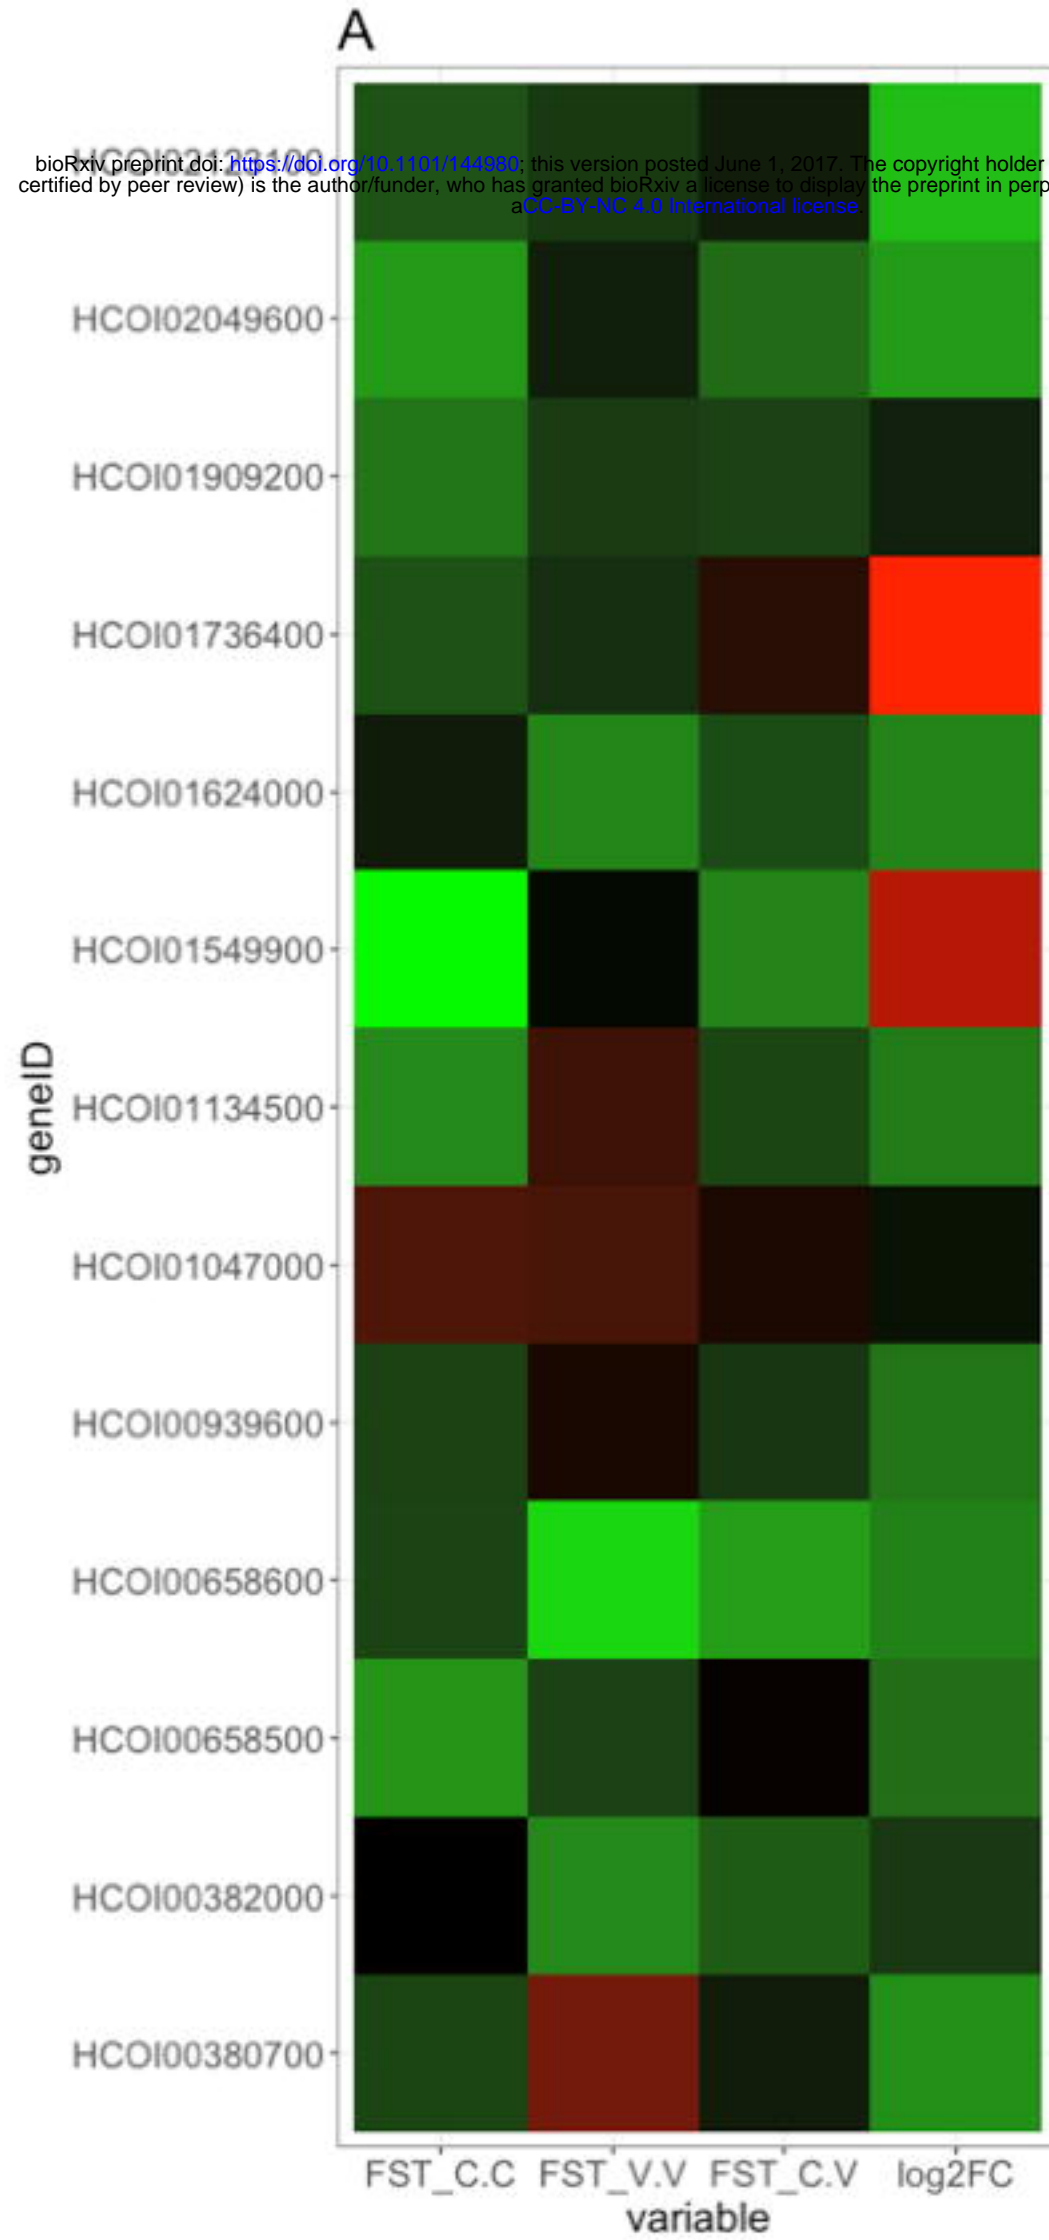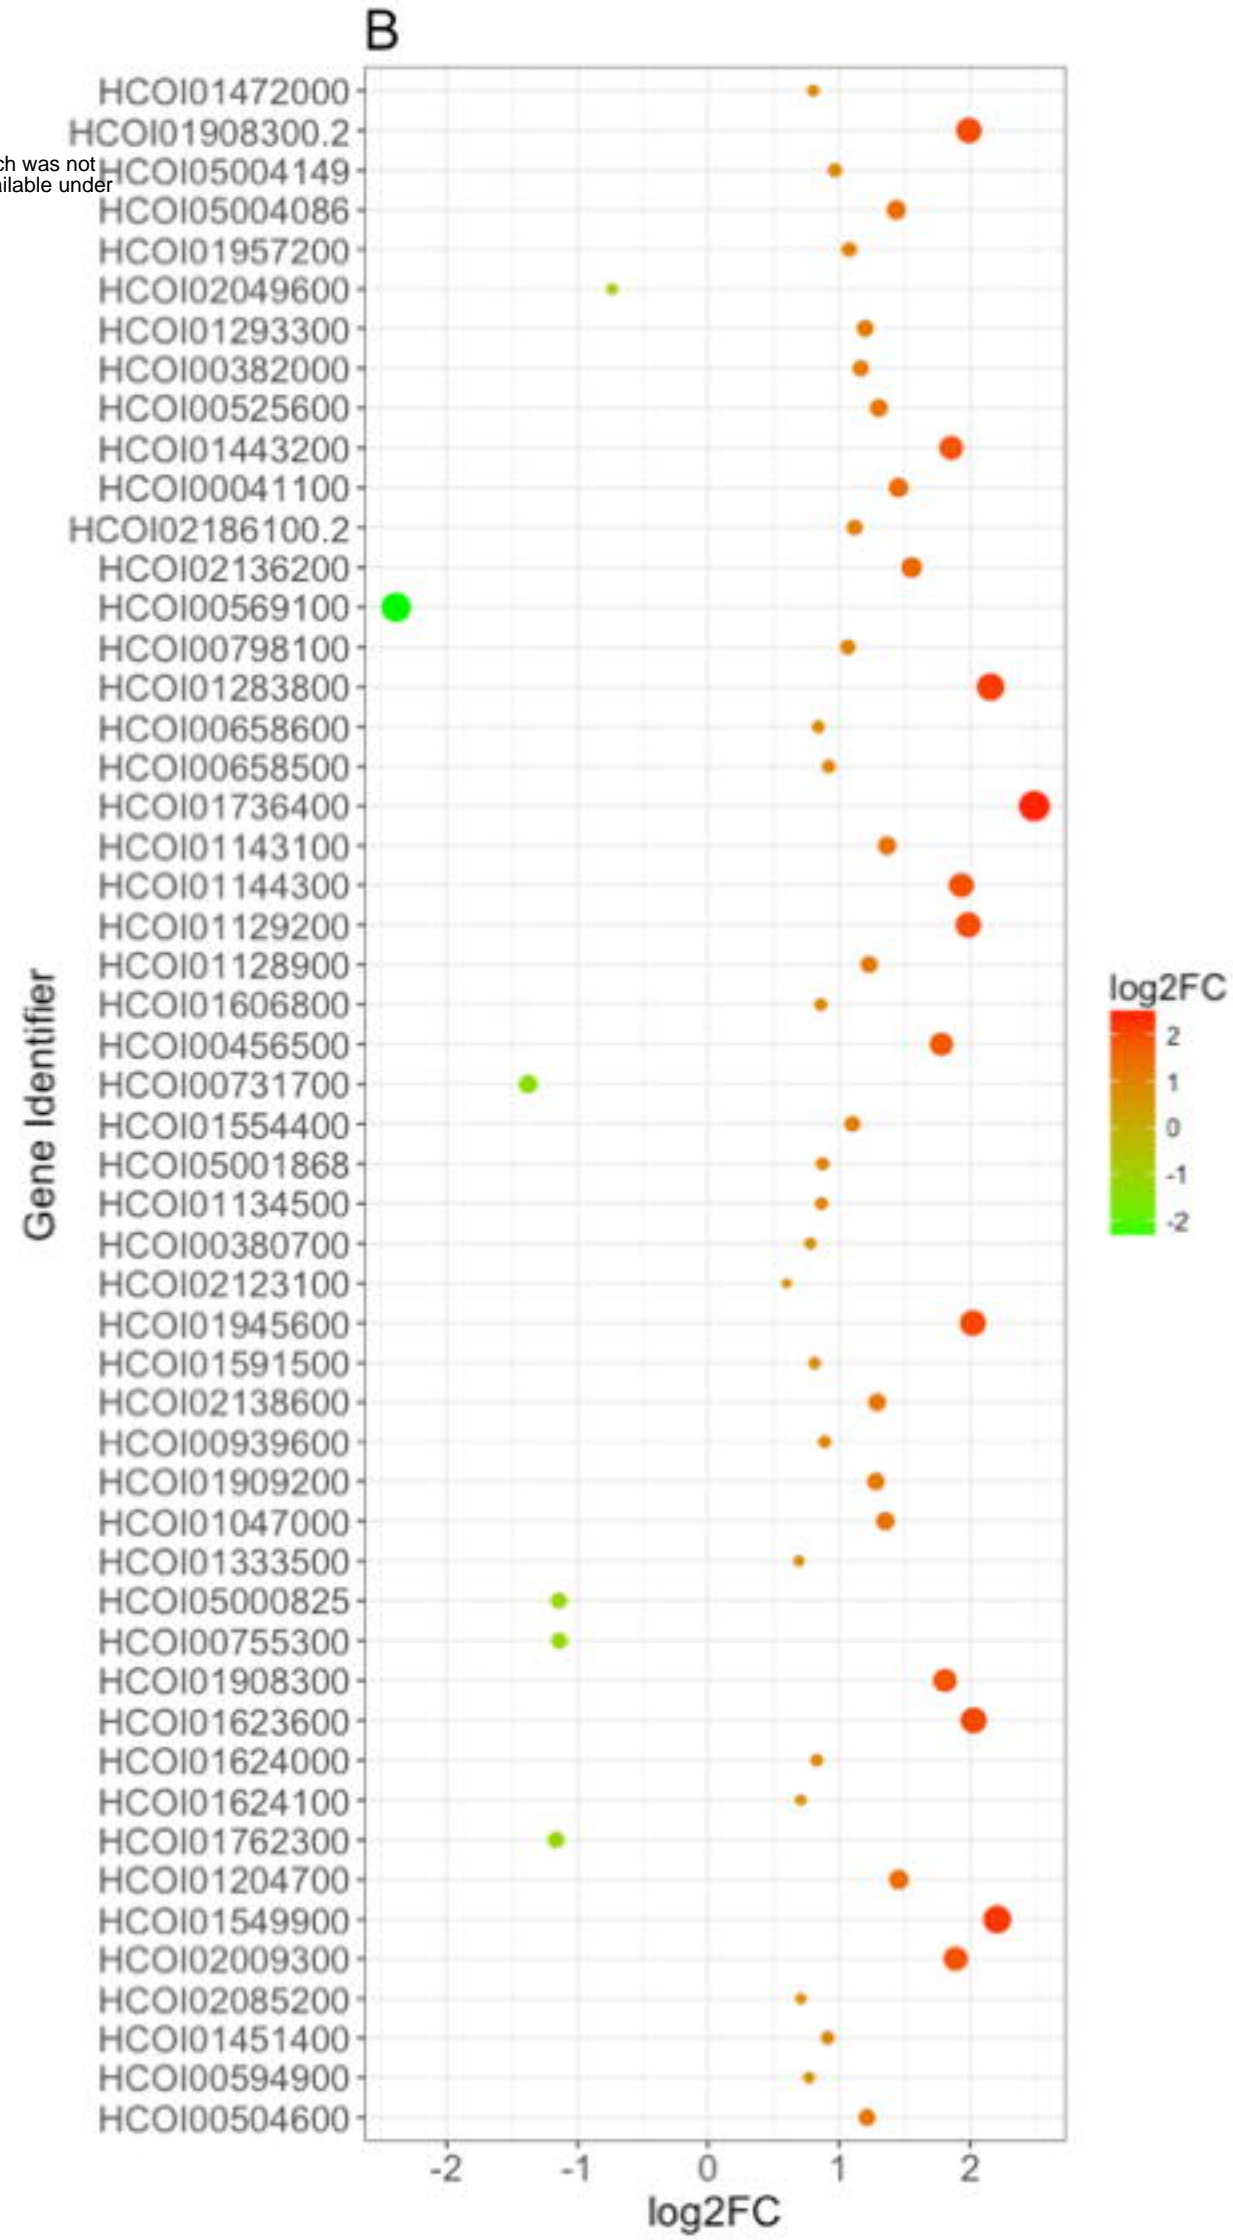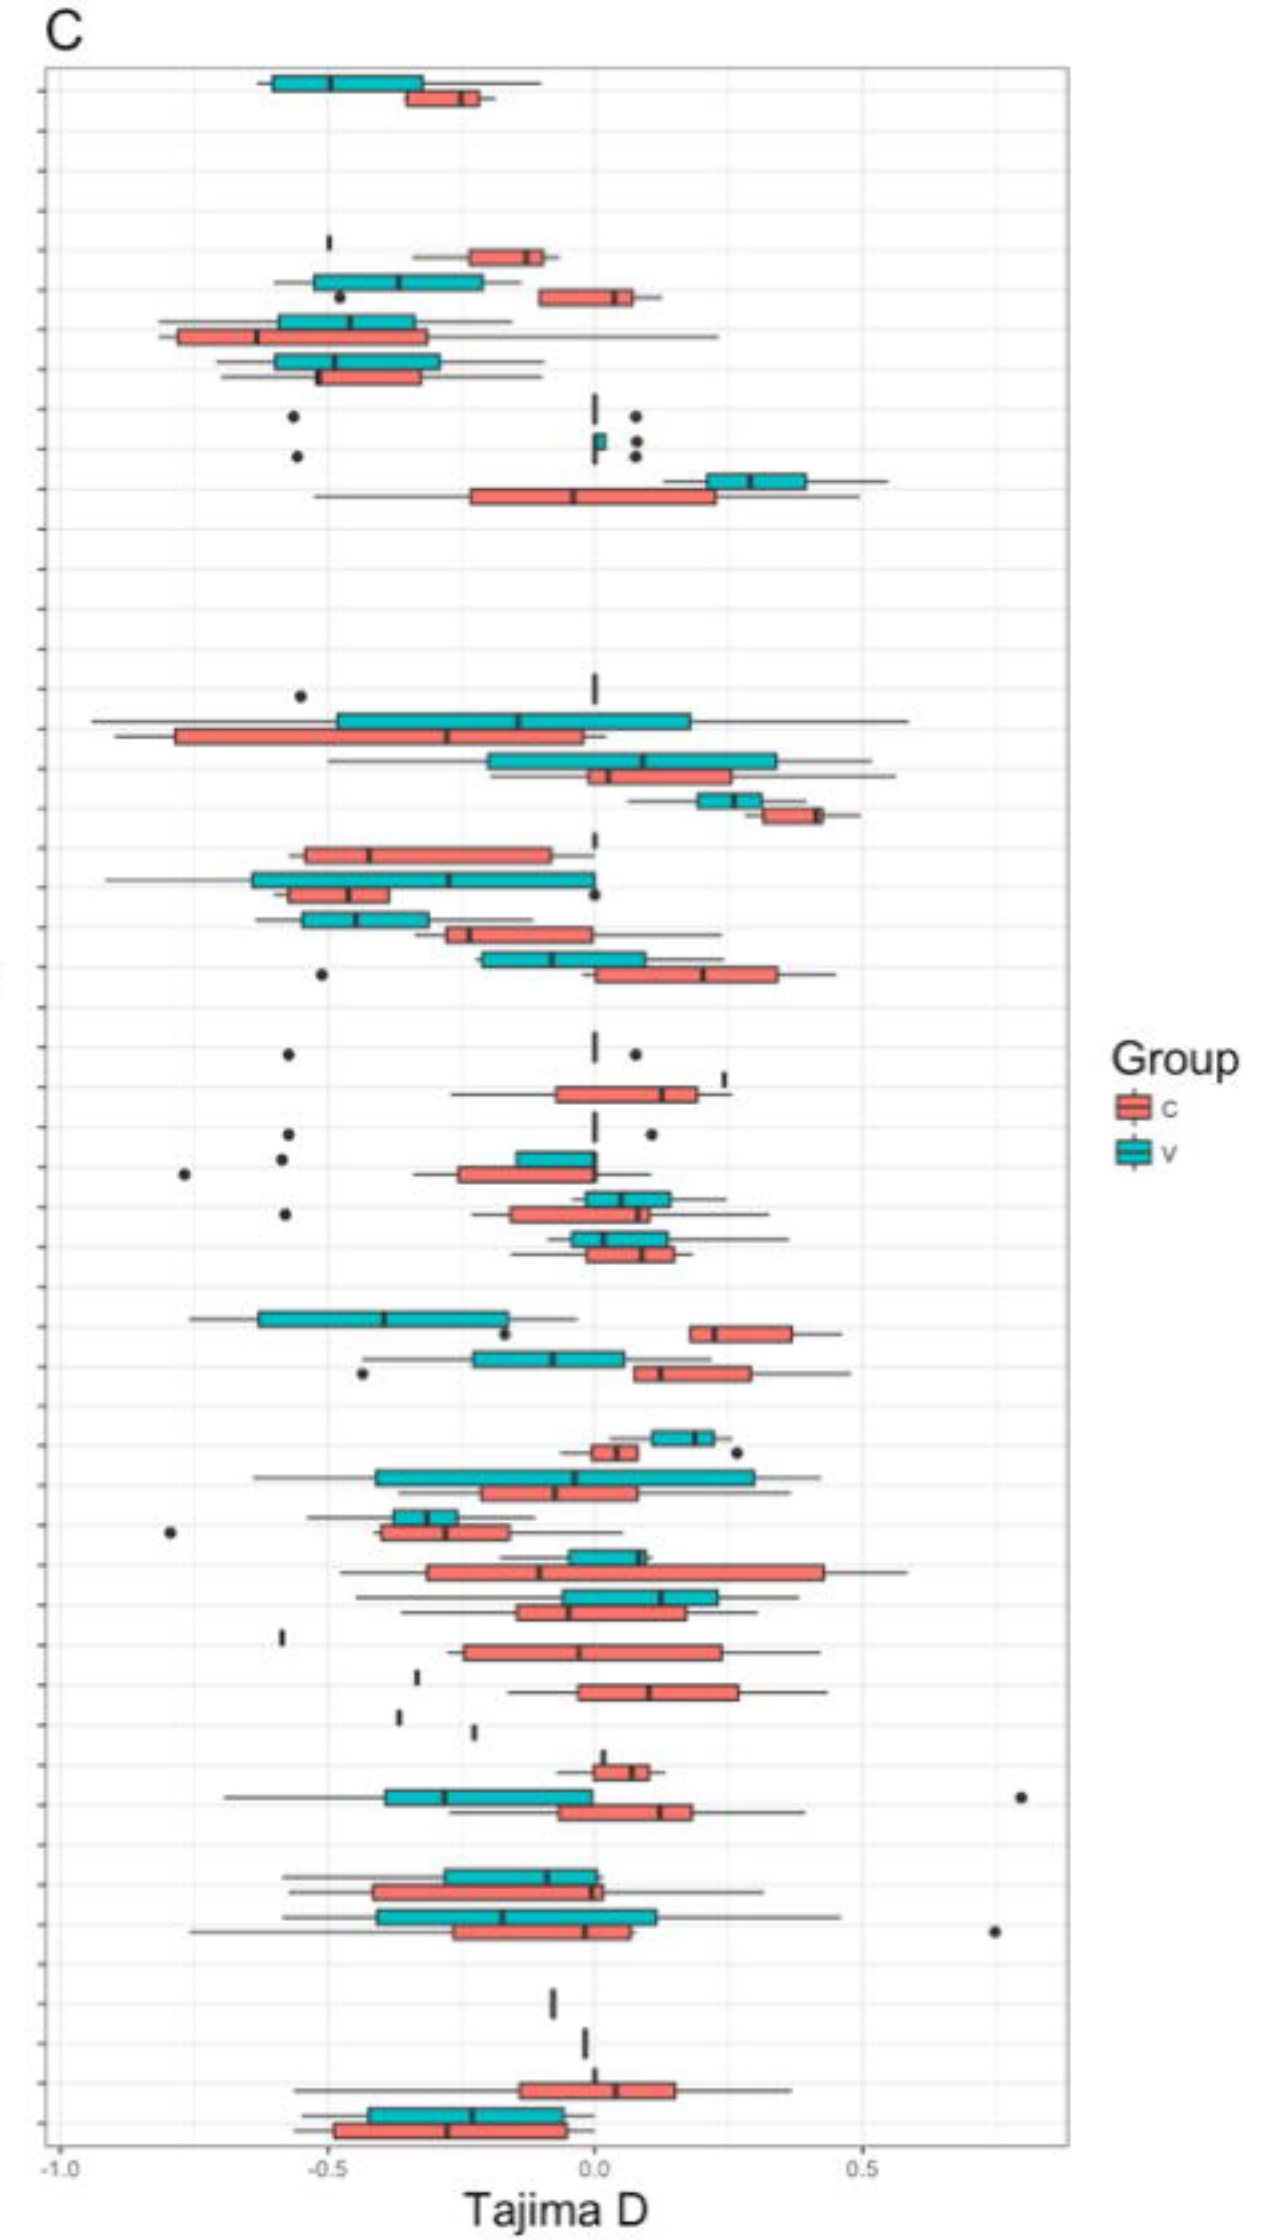

Source: http://biorxiv.org/content/10.1101/144980v1.full.pdf
